# Supplementary material for: Metabolically healthy obese and metabolic syndrome of the lean: the importance of diet quality. Analysis of MAGNETIC cohort
Source: Nutr J. 2020 Feb 25;19:19. doi: 10.1186/s12937-020-00532-0 (PMC7041188; doi:10.1186/s12937-020-00532-0)
Supplement: Supplementary file 3 — Additional file 3. Dataset (imputed data): Dataset with imputed values using random forest algorithm (used for multivariable analysis). [file 12937_2020_532_MOESM3_ESM.csv]

sex	bmi_category	age	fh_cad	fh_dm	buscemi_ms_criteria_no	metabolic_syndrome	cholesterol	ldl	hdl	hdl_proc	trig	glucose	hba1c	bmi	whr	sbp	dbp	smoking	place_of_residence_4_groups	place_of_residence_city_over_20	financial_situation_3_groups	above_average_financial_situation	low_physical_activity_leisure_time	education_higher	nutrition_knowledge	central_obesity	waist	pHDI_100	nHDI_100	RC1	RC2	RC3	tertile_western_dp	tertile_prudent_dp	tertile_sweets_and_snacks_dp	nHDI_100_10	pHDI_100_10
m	overweight	29.69041096	TRUE	FALSE	0	0	4.1	2.53	1.18	29	0.89	5	5	27.46481071	0.990740741	121	72	TRUE	city_below_20	FALSE	average	FALSE	TRUE	FALSE	10	TRUE	107	18.7	21.78571429	0.503350721	-1.331161231	1.733090839	[ 0.387, 3.526]	[-2.114,-0.505)	[ 0.275, 5.091]	0.61	0.374
m	normal weight	18.06027397	TRUE	FALSE	2	1	4.05	2.46	1.31	32	1.51	6	5.5	19.17039005	0.755102041	134	73	FALSE	city_over_100	TRUE	average	FALSE	FALSE	FALSE	9	FALSE	74	8.2	22	1.334952783	-0.624675253	-0.177392822	[ 0.387, 3.526]	[-2.114,-0.505)	[-0.455, 0.275)	0.616	0.164
f	normal weight	33.33972603	TRUE	TRUE	0	0	6.45	3.91	2.26	35	1.08	4.7	5.2	18.42403628	0.875	100	60	FALSE	city_20_100	TRUE	average	FALSE	FALSE	TRUE	15	FALSE	77	2.6	23.92857143	1.363546568	-1.192193269	-0.615886707	[ 0.387, 3.526]	[-2.114,-0.505)	[-2.656,-0.455)	0.67	0.052
f	normal weight	27.63013699	TRUE	FALSE	0	0	4.58	2.93	1.43	31	1.03	4.6	5.1	20.82	0.810810811	95	60	FALSE	city_over_100	TRUE	average	FALSE	FALSE	TRUE	15	FALSE	60	21.9	13.35714286	-0.512295981	-0.57990722	1.792838405	[-2.231,-0.484)	[-2.114,-0.505)	[ 0.275, 5.091]	0.374	0.438
f	normal weight	24.40273973	TRUE	FALSE	0	0	5.26	3.5	1.35	26	1.48	4.9	5.6	22.46003435	0.819148936	100	60	FALSE	city_over_100	TRUE	average	FALSE	FALSE	FALSE	8	FALSE	77	12	9	-0.698403092	-1.262909222	0.186183684	[-2.231,-0.484)	[-2.114,-0.505)	[-0.455, 0.275)	0.252	0.24
m	overweight	29.62465753	TRUE	FALSE	0	0	4.74	2.95	1.33	28	1.6	4.9	5.3	28.76055035	0.918181818	118	69	FALSE	city_20_100	TRUE	average	FALSE	FALSE	TRUE	12	FALSE	101	18.9	21.28571429	0.985922876	0.443300572	3.247977856	[ 0.387, 3.526]	[ 0.266, 5.061]	[ 0.275, 5.091]	0.596	0.378
m	overweight	30.78356164	TRUE	TRUE	2	1	5.51	3.89	1.22	22	1.22	5.1	5.3	25.74694432	0.901960784	130	76	TRUE	city_below_20	FALSE	average	FALSE	FALSE	FALSE	11	FALSE	92	10.4	20.78571429	-0.243957177	-1.442404678	-0.200584192	[-0.484, 0.387)	[-2.114,-0.505)	[-0.455, 0.275)	0.582	0.208
m	overweight	31.11232877	TRUE	FALSE	1	0	5	3.26	1.59	32	0.73	5	5.2	27.75510204	0.950980392	136	72	FALSE	village	FALSE	average	FALSE	FALSE	FALSE	13	FALSE	97	14.1	26.71428571	0.4387758	-0.728215987	-0.510641773	[ 0.387, 3.526]	[-2.114,-0.505)	[-2.656,-0.455)	0.748	0.282
f	normal weight	27.50684932	TRUE	FALSE	0	0	3.95	2.18	1.62	41	0.59	4.6	4.9	21.77384236	0.761363636	107	71	FALSE	village	FALSE	average	FALSE	FALSE	FALSE	13	FALSE	67	25.6	7.714285714	-0.327460223	-1.091724289	0.029642981	[-0.484, 0.387)	[-2.114,-0.505)	[-0.455, 0.275)	0.216	0.512
f	normal weight	30.74520548	TRUE	FALSE	0	0	4.07	2.37	1.46	36	0.6	5.2	5.1	20.9572742	0.722222222	111	63	TRUE	city_below_20	FALSE	above_average	TRUE	FALSE	TRUE	11	FALSE	65	18.4	21.5	0.143876594	-1.337494922	-0.933971987	[-0.484, 0.387)	[-2.114,-0.505)	[-2.656,-0.455)	0.602	0.368
m	overweight	26.27671233	TRUE	TRUE	5	1	5.88	4.49	0.9	15	1.72	5.6	5.3	29.96161169	0.96039604	143	71	FALSE	city_20_100	TRUE	above_average	TRUE	FALSE	FALSE	14	FALSE	97	34.2	9.5	-0.077587671	2.721371048	0.2412166	[-0.484, 0.387)	[ 0.266, 5.061]	[-0.455, 0.275)	0.266	0.684
f	normal weight	20.67123288	TRUE	FALSE	0	0	4.81	2.69	2.01	42	0.74	5	5	20.57	0.870588235	112	74	FALSE	city_20_100	TRUE	average	FALSE	FALSE	FALSE	11	FALSE	74	22	17.5	0.767860073	-0.80270706	0.768948971	[ 0.387, 3.526]	[-2.114,-0.505)	[ 0.275, 5.091]	0.49	0.44
m	normal weight	34.59178082	TRUE	FALSE	2	1	5.82	3.92	1.67	29	0.97	5.4	5.3	24.15881797	0.852631579	130	75	FALSE	city_20_100	TRUE	average	FALSE	FALSE	TRUE	13	FALSE	81	10.9	17.85714286	-0.688271666	-1.472110227	-0.095871534	[-2.231,-0.484)	[-2.114,-0.505)	[-0.455, 0.275)	0.5	0.218
m	normal weight	35.6630137	TRUE	FALSE	1	0	7.64	5.94	1.58	21	0.8	5.3	5.7	22.56659513	0.907216495	129	80	FALSE	city_over_100	TRUE	average	FALSE	FALSE	TRUE	8	FALSE	88	15.6	17.28571429	-0.664734978	-0.340309846	-0.430194702	[-2.231,-0.484)	[-0.505, 0.266)	[-0.455, 0.275)	0.484	0.312
m	obese	30.4630137	TRUE	TRUE	5	1	5.82	3.97	0.93	16	2.78	5.7	5.2	30.75636776	0.927927928	140	90	FALSE	city_20_100	TRUE	average	FALSE	FALSE	FALSE	8	TRUE	103	21.2	33.07142857	0.208226306	-1.007756879	0.256778617	[-0.484, 0.387)	[-2.114,-0.505)	[-0.455, 0.275)	0.926	0.424
m	obese	27.28219178	TRUE	FALSE	2	1	6.64	5.25	1.13	17	1.55	5	5.2	38.50523924	0.983193277	142	86	FALSE	village	FALSE	average	FALSE	TRUE	TRUE	5	TRUE	117	5.7	18.21428571	0.376794845	-1.334349675	-1.133278455	[-0.484, 0.387)	[-2.114,-0.505)	[-2.656,-0.455)	0.51	0.114
f	overweight	35.59726027	TRUE	FALSE	1	0	5.03	3.29	1.46	29	1.09	5.4	5.3	26.21882086	0.847619048	132	83	FALSE	city_over_100	TRUE	average	FALSE	TRUE	FALSE	14	TRUE	89	23.9	12.57142857	-0.177729675	1.195658613	-0.037171844	[-0.484, 0.387)	[ 0.266, 5.061]	[-0.455, 0.275)	0.352	0.478
m	obese	33.72328767	TRUE	FALSE	3	1	6.02	4.23	1.08	18	3.29	5.7	5.6	34.08660523	0.99137931	119	81	FALSE	city_over_100	TRUE	average	FALSE	TRUE	FALSE	11	TRUE	115	15.8	19.85714286	0.350814164	0.476121799	-1.783098724	[-0.484, 0.387)	[ 0.266, 5.061]	[-2.656,-0.455)	0.556	0.316
f	normal weight	22.55616438	TRUE	TRUE	0	0	5.47	3.49	1.72	32	0.7	5.2	5.3	19.95728441	0.717171717	111	63	TRUE	city_over_100	TRUE	average	FALSE	TRUE	FALSE	10	FALSE	71	12.5	27.42857143	1.750765759	-0.41737068	-0.37396733	[ 0.387, 3.526]	[-0.505, 0.266)	[-0.455, 0.275)	0.768	0.25
m	normal weight	20.49589041	TRUE	FALSE	0	0	3.97	2.5	1.38	35	0.76	5.1	5	23.27	0.879120879	128	70	FALSE	city_20_100	TRUE	average	FALSE	FALSE	FALSE	11	FALSE	80	16.9	8.5	0.068296472	-0.515926645	-0.151020688	[-0.484, 0.387)	[-2.114,-0.505)	[-0.455, 0.275)	0.238	0.338
m	obese	32.63835616	TRUE	FALSE	3	1	6.82	4.87	0.97	14	3.61	5.2	5.5	33.69005153	1	118	64	FALSE	village	FALSE	average	FALSE	FALSE	TRUE	11	TRUE	109	24.2	29.71428571	0.190392844	-0.375889467	2.18110268	[-0.484, 0.387)	[-0.505, 0.266)	[ 0.275, 5.091]	0.832	0.484
f	normal weight	35.53972603	TRUE	FALSE	1	0	5.48	3.29	1.93	35	0.9	5.4	5.4	24.44180209	0.787234043	144	84	FALSE	city_below_20	FALSE	above_average	TRUE	FALSE	TRUE	13	FALSE	74	35.9	5.928571429	-0.87323419	2.17571787	-2.167119998	[-2.231,-0.484)	[ 0.266, 5.061]	[-2.656,-0.455)	0.166	0.718
m	normal weight	21.68493151	TRUE	TRUE	1	0	5.63	3.73	1.7	30	1.05	5.1	5.4	23.30109483	1.010526316	114	64	TRUE	city_over_100	TRUE	average	FALSE	FALSE	FALSE	14	FALSE	96	23.4	17.42857143	0.496891816	-0.231482476	0.839024765	[ 0.387, 3.526]	[-0.505, 0.266)	[ 0.275, 5.091]	0.488	0.468
m	obese	32.29315068	TRUE	FALSE	2	1	5.17	3.34	1.46	28	1.03	6	5.5	35.93864134	1.043478261	140	90	TRUE	city_20_100	TRUE	average	FALSE	TRUE	TRUE	9	TRUE	120	16.9	26	2.128826999	0.112437956	-0.49589971	[ 0.387, 3.526]	[-0.505, 0.266)	[-2.656,-0.455)	0.728	0.338
m	overweight	32.9369863	TRUE	FALSE	3	1	6.65	4.48	1.54	23	2.18	4.7	5.2	27.75510204	0.979166667	135	87	FALSE	village	FALSE	average	FALSE	FALSE	TRUE	15	FALSE	94	37.5	22.14285714	1.387570306	2.44953701	1.040626907	[ 0.387, 3.526]	[ 0.266, 5.061]	[ 0.275, 5.091]	0.62	0.75
m	overweight	34.26575342	TRUE	FALSE	2	1	6.88	4.97	1.12	16	3.01	4.6	4.8	28.09	0.939393939	128	81	FALSE	city_over_100	TRUE	average	FALSE	TRUE	TRUE	10	FALSE	93	15.5	20	0.306715774	-0.104704453	-0.808857232	[-0.484, 0.387)	[-0.505, 0.266)	[-2.656,-0.455)	0.56	0.31
m	obese	31.66027397	TRUE	FALSE	1	0	3.38	2.07	1.01	30	1.17	5.1	5.1	32.72461651	0.928571429	128	69	FALSE	village	FALSE	below_average	FALSE	FALSE	FALSE	8	TRUE	104	21.3	24.85714286	1.919071979	-0.246010239	1.649116836	[ 0.387, 3.526]	[-0.505, 0.266)	[ 0.275, 5.091]	0.696	0.426
f	normal weight	24.2630137	TRUE	TRUE	2	1	5.01	3.45	1.26	25	1.81	4.9	5.3	23.42355741	0.817204301	122	80	FALSE	village	FALSE	average	FALSE	FALSE	TRUE	15	FALSE	76	30.9	7.571428571	-1.063036939	1.161027486	0.221779182	[-2.231,-0.484)	[ 0.266, 5.061]	[-0.455, 0.275)	0.212	0.618
f	overweight	21.14520548	TRUE	TRUE	2	1	4.16	2.7	1.23	30	1.1	5.1	5.5	28.71047932	0.82	125	89	FALSE	village	FALSE	average	FALSE	TRUE	FALSE	12	FALSE	82	12.6	22	-0.30747833	-1.264802217	-0.148657826	[-0.484, 0.387)	[-2.114,-0.505)	[-0.455, 0.275)	0.616	0.252
f	obese	25.31232877	TRUE	TRUE	4	1	5.15	3.63	0.94	18	2.38	6.4	5.2	38.75839487	0.96124031	130	80	FALSE	city_over_100	TRUE	average	FALSE	FALSE	FALSE	13	TRUE	124	23.7	8.428571429	-0.896364402	-0.480874842	0.235282916	[-2.231,-0.484)	[-0.505, 0.266)	[-0.455, 0.275)	0.236	0.474
m	overweight	27.43013699	TRUE	TRUE	2	1	5.36	3.96	0.96	18	1.18	4.7	5.1	28.72112107	0.927835052	107	60	FALSE	village	FALSE	average	FALSE	FALSE	TRUE	12	FALSE	90	8.2	18.64285714	0.39688998	-0.315957989	-1.041364601	[ 0.387, 3.526]	[-0.505, 0.266)	[-2.656,-0.455)	0.522	0.164
m	obese	35.79452055	TRUE	FALSE	4	1	7.11	4.69	1.21	17	5.6	7.2	6.3	32.27	1	156	101	FALSE	city_20_100	TRUE	average	FALSE	FALSE	FALSE	12	TRUE	102	6.8	15.35714286	-0.457064988	-1.494166444	-0.821702764	[-0.484, 0.387)	[-2.114,-0.505)	[-2.656,-0.455)	0.43	0.136
m	normal weight	33.93972603	TRUE	FALSE	2	1	6.28	4.37	1.58	25	0.98	5.4	4.8	24.16172246	0.863157895	146	85	FALSE	village	FALSE	average	FALSE	TRUE	FALSE	10	FALSE	82	17.4	18.14285714	0.870035686	-1.065843575	0.992023402	[ 0.387, 3.526]	[-2.114,-0.505)	[ 0.275, 5.091]	0.508	0.348
f	normal weight	30.81643836	FALSE	FALSE	0	0	3.97	1.86	2	50	0.6	4.6	5.1	21.88	0.88	102	65	FALSE	city_over_100	TRUE	above_average	TRUE	TRUE	TRUE	19	FALSE	66	34.2	9.285714286	-1.196002636	0.86329863	-0.997657487	[-2.231,-0.484)	[ 0.266, 5.061]	[-2.656,-0.455)	0.26	0.684
m	overweight	30.78082192	TRUE	FALSE	3	1	5.73	3.79	1.62	28	1.06	5.8	5.1	26.51180407	0.97029703	138	75	TRUE	city_20_100	TRUE	average	FALSE	FALSE	FALSE	9	FALSE	98	11.6	19.92857143	1.252386605	0.375492497	-1.248163327	[ 0.387, 3.526]	[ 0.266, 5.061]	[-2.656,-0.455)	0.558	0.232
m	obese	29.88493151	TRUE	TRUE	3	1	6.45	4.72	1.05	16	3.28	5.2	5.5	31.30907372	0.923809524	154	83	FALSE	city_over_100	TRUE	average	FALSE	FALSE	FALSE	13	FALSE	97	34.2	25.14285714	0.527905151	0.195578408	0.683457832	[ 0.387, 3.526]	[-0.505, 0.266)	[ 0.275, 5.091]	0.704	0.684
f	normal weight	25.00821918	TRUE	FALSE	0	0	5.82	3.27	2.47	42	0.85	4.2	5	21.35930625	0.891566265	120	70	TRUE	city_20_100	TRUE	average	FALSE	TRUE	TRUE	13	FALSE	74	23.8	18.92857143	0.218688061	-0.502703354	0.337419002	[-0.484, 0.387)	[-0.505, 0.266)	[ 0.275, 5.091]	0.53	0.476
m	obese	35.66575342	TRUE	FALSE	2	1	5.92	4.08	1.49	25	1.34	5.3	5.3	34.25605536	1.00990099	146	95	FALSE	city_over_100	TRUE	average	FALSE	FALSE	TRUE	13	TRUE	102	19.6	23.57142857	-1.013721937	-1.13811055	-0.419510985	[-2.231,-0.484)	[-2.114,-0.505)	[-0.455, 0.275)	0.66	0.392
m	obese	32.73150685	TRUE	FALSE	3	1	5.35	3.86	0.72	13	2.74	4.7	5.2	38.31417625	1.019230769	118	66	TRUE	city_20_100	TRUE	average	FALSE	TRUE	FALSE	2	TRUE	106	10.5	23.28571429	0.148888334	-1.870036865	-0.407270967	[-0.484, 0.387)	[-2.114,-0.505)	[-0.455, 0.275)	0.652	0.21
m	overweight	21.3260274	TRUE	FALSE	3	1	5.35	3.59	1.23	23	1.69	5	5.5	25.88057064	0.921348315	141	87	TRUE	city_over_100	TRUE	average	FALSE	FALSE	FALSE	6	FALSE	82	13.5	20	0.506146753	-1.600019957	-0.252148879	[ 0.387, 3.526]	[-2.114,-0.505)	[-0.455, 0.275)	0.56	0.27
m	overweight	27.17534247	TRUE	FALSE	1	0	4.61	3.22	0.98	21	1.29	5.2	5.4	25.79591837	0.898876404	113	66	TRUE	city_below_20	FALSE	average	FALSE	FALSE	FALSE	8	FALSE	80	16.5	22.14285714	1.806842547	-0.739420883	0.719842355	[ 0.387, 3.526]	[-2.114,-0.505)	[ 0.275, 5.091]	0.62	0.33
m	normal weight	29.18356164	TRUE	FALSE	3	1	5.53	4.11	1.02	18	1.37	5.5	5	23.58983547	0.860215054	154	82	FALSE	city_over_100	TRUE	average	FALSE	FALSE	TRUE	12	FALSE	80	38.9	19.78571429	0.975781355	2.322174455	1.72421368	[ 0.387, 3.526]	[ 0.266, 5.061]	[ 0.275, 5.091]	0.554	0.778
m	overweight	29.18630137	TRUE	FALSE	0	0	4.33	2.69	1.39	32	0.92	5.2	5.1	29.03673779	0.946808511	123	71	FALSE	village	FALSE	average	FALSE	FALSE	FALSE	7	FALSE	89	17.6	13.07142857	0.106988959	-0.519938666	-0.956874262	[-0.484, 0.387)	[-2.114,-0.505)	[-2.656,-0.455)	0.366	0.352
f	normal weight	29.88219178	TRUE	TRUE	0	0	5.52	3.39	1.8	33	1.41	5.1	5.1	19.65105601	0.87804878	120	70	TRUE	city_20_100	TRUE	average	FALSE	FALSE	FALSE	8	FALSE	72	18.4	26.57142857	0.386621517	0.180290151	-0.926181628	[ 0.387, 3.526]	[-0.505, 0.266)	[-2.656,-0.455)	0.744	0.368
f	normal weight	33.57260274	TRUE	FALSE	0	0	3.39	1.41	2.07	61	0.48	4.9	5	19.89143367	0.720430108	116	67	FALSE	city_over_100	TRUE	average	FALSE	FALSE	TRUE	15	FALSE	67	19.5	13	-0.465665839	-1.253839301	0.258689431	[-0.484, 0.387)	[-2.114,-0.505)	[-0.455, 0.275)	0.364	0.39
m	normal weight	23.88767123	TRUE	FALSE	0	0	4.56	2.77	1.73	38	0.71	5.2	5.2	20.37037037	0.82	128	82	FALSE	city_20_100	TRUE	above_average	TRUE	FALSE	FALSE	6	FALSE	82	2.9	26.57142857	0.965031654	-1.930211858	0.081762264	[ 0.387, 3.526]	[-2.114,-0.505)	[-0.455, 0.275)	0.744	0.058
m	normal weight	27.80547945	FALSE	TRUE	2	1	6.68	4.59	1.56	23	2.62	5.3	5.3	21.15	1.061538462	115	69	TRUE	city_20_100	TRUE	average	FALSE	TRUE	TRUE	9	FALSE	69	11.1	18.07142857	0.354946969	-0.374084318	-0.818802159	[-0.484, 0.387)	[-0.505, 0.266)	[-2.656,-0.455)	0.506	0.222
m	obese	31.5260274	TRUE	TRUE	3	1	6.34	4.1	1.7	27	1.43	6.2	5.4	31.21748179	0.953271028	135	50	FALSE	city_over_100	TRUE	average	FALSE	FALSE	TRUE	19	TRUE	102	31.2	24.42857143	2.485680294	1.361594118	-1.308065484	[ 0.387, 3.526]	[ 0.266, 5.061]	[-2.656,-0.455)	0.684	0.624
f	overweight	32.58082192	TRUE	TRUE	1	0	5.85	3.44	1.98	34	1.02	4.7	5.1	25.09666865	0.82	138	100	TRUE	city_over_100	TRUE	average	FALSE	TRUE	TRUE	15	FALSE	82	20.9	10.92857143	-0.869162774	-0.234093822	-0.247038175	[-2.231,-0.484)	[-0.505, 0.266)	[-0.455, 0.275)	0.306	0.418
m	overweight	23.61917808	TRUE	TRUE	1	0	4.21	2.64	1.27	30	1.37	5.4	5.1	28.75434028	0.888888889	134	77	TRUE	city_over_100	TRUE	average	FALSE	FALSE	TRUE	8	FALSE	88	14.3	14.42857143	0.473547595	-0.31045368	-1.430325795	[ 0.387, 3.526]	[-0.505, 0.266)	[-2.656,-0.455)	0.404	0.286
m	overweight	23.66849315	TRUE	FALSE	0	0	4.35	2.54	1.51	33	1.24	4.8	5.2	25.49913194	0.93814433	123	67	TRUE	city_below_20	FALSE	average	FALSE	FALSE	FALSE	9	FALSE	91	20.2	18.14285714	-0.118661961	-0.417246164	0.26533792	[-0.484, 0.387)	[-0.505, 0.266)	[-0.455, 0.275)	0.508	0.404
m	normal weight	35.97534247	TRUE	FALSE	3	1	5.33	3.45	0.83	16	3.2	5.1	5.1	22.54595907	0.967032967	127	70	FALSE	city_over_100	TRUE	average	FALSE	FALSE	TRUE	22	FALSE	88	18	13.57142857	-0.384551329	0.916252547	-0.630724007	[-0.484, 0.387)	[ 0.266, 5.061]	[-2.656,-0.455)	0.38	0.36
m	normal weight	20.33150685	FALSE	FALSE	0	0	3.99	2.51	1.16	29	1.18	4.7	5.1	21.84	0.857142857	125	66	FALSE	city_over_100	TRUE	above_average	TRUE	FALSE	FALSE	15	FALSE	78	9.7	14.42857143	1.051538573	0.034671776	-0.630597768	[ 0.387, 3.526]	[-0.505, 0.266)	[-2.656,-0.455)	0.404	0.194
f	normal weight	22.61369863	TRUE	TRUE	0	0	4.46	2.51	1.75	39	0.61	4.6	4.8	20.90419501	0.727272727	116	74	FALSE	village	FALSE	average	FALSE	FALSE	FALSE	15	FALSE	72	48.5	12.21428571	-0.710082947	1.536968108	-0.987333242	[-2.231,-0.484)	[ 0.266, 5.061]	[-2.656,-0.455)	0.342	0.97
f	normal weight	20.79726027	TRUE	FALSE	0	0	3.79	2.07	1.51	40	0.73	4.4	5	20.703125	0.852941176	112	69	FALSE	city_20_100	TRUE	below_average	FALSE	TRUE	FALSE	7	FALSE	58	20	13.21428571	0.543817369	-0.667776805	0.774421645	[ 0.387, 3.526]	[-2.114,-0.505)	[ 0.275, 5.091]	0.37	0.4
m	overweight	29.55890411	TRUE	FALSE	3	1	6.06	3.96	1.02	17	2.69	5	5.5	26.86120692	0.925531915	126	71	TRUE	city_20_100	TRUE	average	FALSE	FALSE	TRUE	12	FALSE	87	24.5	34.28571429	1.551163807	-0.48604761	2.024991475	[ 0.387, 3.526]	[-0.505, 0.266)	[ 0.275, 5.091]	0.96	0.49
m	overweight	22.31232877	TRUE	TRUE	0	0	3.94	2.49	1.16	29	1.22	5.4	5.2	26.22874135	0.902912621	108	52	FALSE	city_over_100	TRUE	average	FALSE	TRUE	FALSE	7	FALSE	93	3.5	10.28571429	0.743783703	-1.727304068	-0.028538492	[ 0.387, 3.526]	[-2.114,-0.505)	[-0.455, 0.275)	0.288	0.07
m	normal weight	29.11506849	TRUE	FALSE	2	1	4.47	3.09	0.99	22	0.81	5.6	5.2	22.64219297	0.965517241	125	68	FALSE	city_below_20	FALSE	average	FALSE	TRUE	FALSE	12	FALSE	84	8.4	19.21428571	0.67712604	-0.463335646	0.060239749	[ 0.387, 3.526]	[-0.505, 0.266)	[-0.455, 0.275)	0.538	0.168
f	overweight	29.59452055	TRUE	FALSE	0	0	4.21	2.57	1.48	35	0.44	5.5	5.1	27.23922448	0.833333333	113	62	FALSE	city_below_20	FALSE	average	FALSE	FALSE	TRUE	6	FALSE	75	14	18.28571429	0.161809547	-0.707292084	0.66638678	[-0.484, 0.387)	[-2.114,-0.505)	[ 0.275, 5.091]	0.512	0.28
f	normal weight	33.99726027	TRUE	FALSE	0	0	7.87	5.1	2.35	30	1.24	4.5	5.1	21.18	0.693877551	123	80	FALSE	city_over_100	TRUE	average	FALSE	FALSE	TRUE	15	FALSE	68	32.4	7.928571429	-1.6047391	0.366643485	-0.427717419	[-2.231,-0.484)	[ 0.266, 5.061]	[-0.455, 0.275)	0.222	0.648
m	normal weight	35.30410959	TRUE	FALSE	0	0	4.97	3.15	1.55	31	0.8	4.6	5.5	24.61810377	0.841584158	127	59	TRUE	village	FALSE	average	FALSE	FALSE	TRUE	12	FALSE	85	19.8	31.21428571	0.834519117	0.175555634	1.546696966	[ 0.387, 3.526]	[-0.505, 0.266)	[ 0.275, 5.091]	0.874	0.396
f	overweight	25.25479452	TRUE	FALSE	0	0	4.81	3.03	1.51	31	0.71	4.6	5.5	25.95155709	0.833333333	123	71	FALSE	village	FALSE	average	FALSE	FALSE	TRUE	12	FALSE	80	21.6	15.35714286	-0.479558383	0.598241683	0.753131711	[-0.484, 0.387)	[ 0.266, 5.061]	[ 0.275, 5.091]	0.43	0.432
m	overweight	34.94246575	TRUE	FALSE	2	1	5.15	3.68	1	19	1.39	5.5	5.4	27.77442338	0.916666667	146	82	TRUE	city_20_100	TRUE	average	FALSE	TRUE	TRUE	11	FALSE	88	7.9	26.07142857	0.644235485	-1.082549889	-0.931033886	[ 0.387, 3.526]	[-2.114,-0.505)	[-2.656,-0.455)	0.73	0.158
m	overweight	30.40273973	TRUE	TRUE	3	1	5.41	3.92	1.03	19	1.13	4.8	5.3	29.75778547	1	142	81	TRUE	city_over_100	TRUE	average	FALSE	TRUE	FALSE	10	FALSE	96	13.4	32.21428571	1.355290342	-0.259338956	0.846157913	[ 0.387, 3.526]	[-0.505, 0.266)	[ 0.275, 5.091]	0.902	0.268
m	normal weight	26.07671233	TRUE	FALSE	3	1	6.11	4.27	1.23	20	2.51	4.9	5.1	23.58983547	0.886597938	134	85	FALSE	city_over_100	TRUE	above_average	TRUE	TRUE	TRUE	13	FALSE	86	23.4	13.42857143	0.123842188	-0.133134767	-0.521174748	[-0.484, 0.387)	[-0.505, 0.266)	[-2.656,-0.455)	0.376	0.468
f	normal weight	31.30136986	TRUE	FALSE	1	0	5.79	4	1.41	24	1.51	4.5	5.1	19.57168128	0.764705882	115	87	TRUE	city_20_100	TRUE	above_average	TRUE	FALSE	TRUE	17	FALSE	65	35.6	11.35714286	-0.812257678	2.56119383	-0.184200802	[-2.231,-0.484)	[ 0.266, 5.061]	[-0.455, 0.275)	0.318	0.712
f	normal weight	35.26027397	TRUE	FALSE	0	0	5.05	2.99	1.92	38	0.57	4.3	4.9	24.06404739	0.797752809	99	68	FALSE	city_over_100	TRUE	average	FALSE	FALSE	TRUE	11	FALSE	71	26.3	14.78571429	-0.74924973	0.926399996	0.285161046	[-2.231,-0.484)	[ 0.266, 5.061]	[ 0.275, 5.091]	0.414	0.526
m	normal weight	29.81369863	TRUE	FALSE	0	0	4.16	2.26	1.59	38	1.45	5.3	5.5	22.84332169	0.794117647	120	80	FALSE	city_over_100	TRUE	average	FALSE	FALSE	TRUE	10	FALSE	81	33.1	5.642857143	-1.044418723	0.212045059	1.035238558	[-2.231,-0.484)	[-0.505, 0.266)	[ 0.275, 5.091]	0.158	0.662
f	normal weight	18.06575342	TRUE	FALSE	0	0	3.93	2.21	1.44	37	1.01	4.8	4.9	20.43816558	0.87654321	115	72	FALSE	city_20_100	TRUE	average	FALSE	FALSE	FALSE	13	FALSE	71	24.5	21.5	1.309365987	0.686801033	-0.387434611	[ 0.387, 3.526]	[ 0.266, 5.061]	[-0.455, 0.275)	0.602	0.49
m	obese	25.57808219	TRUE	FALSE	2	1	5.89	4.15	1.3	22	1.27	5	5.5	34.56708127	0.93495935	142	93	FALSE	village	FALSE	average	FALSE	FALSE	FALSE	9	TRUE	115	7.5	9.428571429	0.076203889	-1.369064378	-0.682639471	[-0.484, 0.387)	[-2.114,-0.505)	[-2.656,-0.455)	0.264	0.15
m	normal weight	18.68767123	TRUE	FALSE	1	0	3.95	2.16	1.4	35	1.51	5.1	5.2	22.69401893	0.88372093	131	74	TRUE	city_20_100	TRUE	average	FALSE	FALSE	FALSE	17	FALSE	76	20.5	20	1.089466852	-0.492285116	0.951598849	[ 0.387, 3.526]	[-0.505, 0.266)	[ 0.275, 5.091]	0.56	0.41
f	obese	30.16164384	TRUE	FALSE	2	1	4.8	3.02	1.24	26	1.46	5.1	5.1	32.32323232	0.95	140	90	FALSE	city_20_100	TRUE	average	FALSE	TRUE	TRUE	13	TRUE	95	17.2	10.71428571	-0.196406231	-0.745672045	1.302654533	[-0.484, 0.387)	[-2.114,-0.505)	[ 0.275, 5.091]	0.3	0.344
m	normal weight	24.36438356	TRUE	FALSE	0	0	4.79	3.27	1.27	27	0.75	4.9	5.1	24.56931437	0.927835052	121	66	TRUE	village	FALSE	average	FALSE	FALSE	FALSE	12	FALSE	90	14.4	36.35714286	1.79713962	0.460619611	-0.212421017	[ 0.387, 3.526]	[ 0.266, 5.061]	[-0.455, 0.275)	1.018	0.288
m	normal weight	19.77808219	TRUE	FALSE	0	0	4.63	2.46	1.89	41	0.83	5.1	5.1	23.28203117	0.930693069	116	75	FALSE	city_20_100	TRUE	average	FALSE	FALSE	FALSE	14	FALSE	94	12.6	24.64285714	1.524588735	-0.314024023	0.70253896	[ 0.387, 3.526]	[-0.505, 0.266)	[ 0.275, 5.091]	0.69	0.252
f	normal weight	32.35068493	TRUE	FALSE	0	0	5.53	3.63	1.6	29	0.61	4.6	5.3	20.82999519	0.792682927	110	72	FALSE	city_over_100	TRUE	average	FALSE	FALSE	TRUE	11	FALSE	65	31.4	6.285714286	-1.292395094	-0.342324641	-0.941896435	[-2.231,-0.484)	[-0.505, 0.266)	[-2.656,-0.455)	0.176	0.628
m	normal weight	31.97808219	TRUE	FALSE	1	0	6.4	4.2	1.88	29	0.72	4.6	5.2	24.09907753	0.825242718	108	72	FALSE	village	FALSE	above_average	TRUE	TRUE	TRUE	10	FALSE	85	15.5	19.57142857	-0.196795125	-0.838311172	-0.082631209	[-0.484, 0.387)	[-2.114,-0.505)	[-0.455, 0.275)	0.548	0.31
f	normal weight	29.85205479	TRUE	FALSE	0	0	4.45	2.5	1.84	41	0.66	4.1	4.9	20.07733492	0.866666667	120	75	FALSE	city_20_100	TRUE	above_average	TRUE	FALSE	TRUE	15	FALSE	78	22.3	20	0.370582535	0.264465576	-0.019990334	[-0.484, 0.387)	[-0.505, 0.266)	[-0.455, 0.275)	0.56	0.446
m	obese	28.58356164	TRUE	FALSE	1	0	5.22	3.42	1.28	25	1.68	4.7	5.2	30.79338244	0.819672131	119	63	FALSE	city_over_100	TRUE	above_average	TRUE	FALSE	TRUE	11	FALSE	100	23.4	14.92857143	-1.514084254	0.454268103	-0.81688282	[-2.231,-0.484)	[ 0.266, 5.061]	[-2.656,-0.455)	0.418	0.468
f	overweight	32.65205479	TRUE	TRUE	1	0	5.39	3.41	1.65	31	1.84	5	5.2	28.58	0.869158879	120	65	FALSE	city_over_100	TRUE	above_average	TRUE	FALSE	FALSE	10	TRUE	93	28.7	5.285714286	-1.499100069	-0.093705212	0.074321005	[-2.231,-0.484)	[-0.505, 0.266)	[-0.455, 0.275)	0.148	0.574
m	overweight	25.05205479	TRUE	FALSE	0	0	3.52	2.02	1.34	38	0.74	5	5	26.52851035	0.880434783	125	64	TRUE	city_over_100	TRUE	average	FALSE	FALSE	FALSE	9	FALSE	81	23.1	20.5	1.159988784	0.549722551	1.621254628	[ 0.387, 3.526]	[ 0.266, 5.061]	[ 0.275, 5.091]	0.574	0.462
m	normal weight	22.38630137	TRUE	FALSE	2	1	4.79	3.41	1	21	1.3	5	5.4	24.61810377	0.902173913	138	80	FALSE	city_over_100	TRUE	above_average	TRUE	FALSE	FALSE	15	FALSE	83	19.9	25.71428571	0.920675755	0.414806961	-0.935989132	[ 0.387, 3.526]	[ 0.266, 5.061]	[-2.656,-0.455)	0.72	0.398
m	overweight	32.07123288	TRUE	FALSE	1	0	6.17	4.58	1.33	22	1.12	4.8	5.1	25.82644628	1.020618557	123	75	FALSE	city_over_100	TRUE	above_average	TRUE	FALSE	TRUE	15	FALSE	99	19.9	11.85714286	-0.35202351	1.114511242	-0.392720771	[-0.484, 0.387)	[ 0.266, 5.061]	[-0.455, 0.275)	0.332	0.398
m	overweight	25.28219178	TRUE	TRUE	1	0	4.78	3.29	1.23	26	1.2	5.1	5.4	27.76979795	0.958762887	135	81	TRUE	city_over_100	TRUE	average	FALSE	FALSE	FALSE	10	FALSE	93	12.3	41.64285714	1.797423353	-0.926973019	-0.563060683	[ 0.387, 3.526]	[-2.114,-0.505)	[-2.656,-0.455)	1.166	0.246
m	obese	32.93424658	TRUE	FALSE	3	1	3.91	2.33	0.89	23	2.93	5.4	4.9	31.13	0.905660377	147	77	FALSE	city_over_100	TRUE	above_average	TRUE	FALSE	TRUE	13	FALSE	96	32.5	6.285714286	-1.484984194	2.173941111	-1.016332188	[-2.231,-0.484)	[ 0.266, 5.061]	[-2.656,-0.455)	0.176	0.65
m	obese	33.35342466	TRUE	FALSE	4	1	6.57	4.91	0.96	15	2.3	5.2	5.2	35.4442344	1.064814815	174	110	TRUE	city_20_100	TRUE	average	FALSE	TRUE	FALSE	10	TRUE	115	15.2	45.35714286	1.970281658	-0.477419558	-1.287656939	[ 0.387, 3.526]	[-0.505, 0.266)	[-2.656,-0.455)	1.27	0.304
m	normal weight	29.7260274	TRUE	FALSE	0	0	3.58	2.17	1.16	32	0.58	4.7	5.1	23.12406059	0.833333333	124	76	FALSE	city_over_100	TRUE	above_average	TRUE	FALSE	TRUE	7	FALSE	85	39.2	16.14285714	-0.203356476	1.149723682	0.593358326	[-0.484, 0.387)	[ 0.266, 5.061]	[ 0.275, 5.091]	0.452	0.784
f	normal weight	26.8630137	TRUE	FALSE	0	0	3.88	1.68	2.02	52	0.73	5.1	5	21.51385851	0.724489796	116	84	FALSE	city_over_100	TRUE	average	FALSE	FALSE	TRUE	14	FALSE	71	24.5	9.5	-1.548819681	-1.178712753	0.079372915	[-2.231,-0.484)	[-2.114,-0.505)	[-0.455, 0.275)	0.266	0.49
f	normal weight	23.63287671	TRUE	FALSE	0	0	5.03	2.95	1.97	39	0.59	4.5	4.9	20.90419501	0.729411765	115	72	FALSE	city_below_20	FALSE	average	FALSE	FALSE	TRUE	6	FALSE	62	14.8	23.35714286	0.304239074	-0.914816822	-0.251555707	[-0.484, 0.387)	[-2.114,-0.505)	[-0.455, 0.275)	0.654	0.296
m	normal weight	20.45753425	TRUE	FALSE	1	0	4.14	2.54	1.42	34	0.48	4.3	4.8	23.88844098	0.81	140	70	FALSE	city_below_20	FALSE	above_average	TRUE	FALSE	FALSE	9	FALSE	81	10.9	13.57142857	0.753935712	-0.267882708	0.035810062	[ 0.387, 3.526]	[-0.505, 0.266)	[-0.455, 0.275)	0.38	0.218
m	normal weight	25.4	TRUE	FALSE	1	0	4.92	3	1.82	37	0.5	4.8	5.1	22.09680791	0.757281553	124	89	FALSE	city_20_100	TRUE	above_average	TRUE	FALSE	TRUE	13	FALSE	78	18.4	17.14285714	0.269712937	-0.659334166	0.139905735	[-0.484, 0.387)	[-2.114,-0.505)	[-0.455, 0.275)	0.48	0.368
f	obese	30.7260274	TRUE	TRUE	2	1	4.05	2.7	1.08	27	1.01	5.4	5.6	39.44636678	0.858267717	145	90	TRUE	city_over_100	TRUE	average	FALSE	FALSE	TRUE	14	TRUE	109	26	10.92857143	-1.366354753	1.356486982	0.147445586	[-2.231,-0.484)	[ 0.266, 5.061]	[-0.455, 0.275)	0.306	0.52
f	normal weight	24.80273973	TRUE	FALSE	0	0	4.82	2.71	2.01	42	0.64	5.1	5.1	22.69387755	0.766990291	117	77	FALSE	city_over_100	TRUE	average	FALSE	TRUE	TRUE	12	FALSE	79	14.5	20.78571429	0.123972321	-0.525250779	-0.020204461	[-0.484, 0.387)	[-2.114,-0.505)	[-0.455, 0.275)	0.582	0.29
m	normal weight	31.45479452	TRUE	FALSE	1	0	6.19	4.49	1.41	23	1.01	5.2	5.2	22.63467632	0.875	128	77	FALSE	city_over_100	TRUE	above_average	TRUE	FALSE	TRUE	12	FALSE	91	26.7	18.78571429	0.31572179	1.450241346	-0.108142014	[-0.484, 0.387)	[ 0.266, 5.061]	[-0.455, 0.275)	0.526	0.534
m	normal weight	28.29041096	TRUE	FALSE	0	0	3.72	1.91	1.66	45	0.69	5.4	4.7	22.34351559	0.91011236	119	79	FALSE	city_over_100	TRUE	average	FALSE	FALSE	TRUE	8	FALSE	81	20.1	15.42857143	0.099155212	-0.793177314	0.372630918	[-0.484, 0.387)	[-2.114,-0.505)	[ 0.275, 5.091]	0.432	0.402
m	overweight	24.77808219	TRUE	FALSE	1	0	3.78	2.31	1.1	29	2	4.7	4.9	27.45288684	0.923076923	125	56	FALSE	city_over_100	TRUE	average	FALSE	FALSE	TRUE	5	FALSE	96	23.5	19.07142857	-0.035005997	0.893187026	-0.140237389	[-0.484, 0.387)	[ 0.266, 5.061]	[-0.455, 0.275)	0.534	0.47
m	normal weight	27.88219178	TRUE	TRUE	1	0	5.75	3.62	1.75	30	0.51	5.1	4.9	22.59143813	0.967032967	118	71	FALSE	village	FALSE	average	FALSE	FALSE	TRUE	9	FALSE	88	16.6	17.71428571	0.426656295	0.099684116	0.82480502	[ 0.387, 3.526]	[-0.505, 0.266)	[ 0.275, 5.091]	0.496	0.332
f	normal weight	30.60547945	TRUE	TRUE	0	0	4.98	2.64	2.18	44	0.61	4.7	5.1	16.70620468	0.823529412	120	70	FALSE	city_20_100	TRUE	average	FALSE	FALSE	TRUE	12	FALSE	70	23.8	7.071428571	-0.886560852	0.123193029	0.196605982	[-2.231,-0.484)	[-0.505, 0.266)	[-0.455, 0.275)	0.198	0.476
m	overweight	34.1260274	TRUE	FALSE	0	0	4.88	3.27	1.23	25	1.26	4.9	5.3	25.88057064	0.927835052	129	74	FALSE	city_over_100	TRUE	average	FALSE	FALSE	TRUE	12	FALSE	90	34.6	22.07142857	0.894310755	0.138307508	2.416318572	[ 0.387, 3.526]	[-0.505, 0.266)	[ 0.275, 5.091]	0.618	0.692
f	normal weight	25.23561644	TRUE	FALSE	0	0	4.06	2.37	1.34	33	0.77	5.1	5	20.51913409	0.923913043	124	72	FALSE	city_20_100	TRUE	average	FALSE	FALSE	TRUE	9	FALSE	85	12.4	25.14285714	-0.212256939	-1.43638753	-0.545664979	[-0.484, 0.387)	[-2.114,-0.505)	[-2.656,-0.455)	0.704	0.248
m	overweight	27.0109589	TRUE	FALSE	1	0	4.08	2.52	1.13	28	1.43	4.5	5	26.21882086	0.9	133	84	FALSE	city_over_100	TRUE	above_average	TRUE	TRUE	TRUE	13	FALSE	81	16.2	14.35714286	0.045132284	-0.086811459	-0.653440563	[-0.484, 0.387)	[-0.505, 0.266)	[-2.656,-0.455)	0.402	0.324
m	normal weight	23.27123288	TRUE	FALSE	0	0	4.89	3.14	1.56	32	0.7	4.8	5.2	20.67	0.778947368	115	71	FALSE	city_20_100	TRUE	above_average	TRUE	FALSE	FALSE	13	FALSE	74	11.2	38.42857143	1.591085053	-0.578988111	1.37490796	[ 0.387, 3.526]	[-2.114,-0.505)	[ 0.275, 5.091]	1.076	0.224
m	overweight	33.0739726	TRUE	FALSE	3	1	5.98	3.94	1.6	27	0.79	5.6	5.4	28.08901095	0.846938776	135	76	TRUE	city_20_100	TRUE	average	FALSE	FALSE	FALSE	7	FALSE	83	12.3	25	1.546577917	0.655169022	0.817632913	[ 0.387, 3.526]	[ 0.266, 5.061]	[ 0.275, 5.091]	0.7	0.246
m	overweight	33.72054795	TRUE	FALSE	1	0	4.41	2.86	1.37	31	0.51	5.2	4.6	26.30901656	0.95959596	152	81	FALSE	city_20_100	TRUE	below_average	FALSE	FALSE	FALSE	11	FALSE	95	15.5	21.71428571	1.339010202	1.175075889	-0.220774701	[ 0.387, 3.526]	[ 0.266, 5.061]	[-0.455, 0.275)	0.608	0.31
m	normal weight	20.30410959	TRUE	FALSE	0	0	4.61	2.59	1.72	37	0.8	5.2	5.2	24.28026361	0.884210526	119	61	FALSE	city_over_100	TRUE	average	FALSE	FALSE	FALSE	15	FALSE	84	11.1	12.28571429	0.584487902	-0.831426966	-0.335805343	[ 0.387, 3.526]	[-2.114,-0.505)	[-0.455, 0.275)	0.344	0.222
m	normal weight	26.79726027	TRUE	FALSE	1	0	6.19	4.52	1.32	21	1.07	5	5.1	23.0400202	0.821782178	117	69	TRUE	city_over_100	TRUE	average	FALSE	FALSE	FALSE	9	FALSE	83	10.1	33.14285714	1.833778926	-1.536837461	0.484847087	[ 0.387, 3.526]	[-2.114,-0.505)	[ 0.275, 5.091]	0.928	0.202
f	obese	30.77534247	TRUE	FALSE	1	0	4.7	2.69	1.84	39	1.03	5	5.1	31.22	0.830508475	130	70	FALSE	city_20_100	TRUE	below_average	FALSE	TRUE	FALSE	9	TRUE	98	15.5	8.571428571	-0.858715255	-1.187142947	-0.40183289	[-2.231,-0.484)	[-2.114,-0.505)	[-0.455, 0.275)	0.24	0.31
f	normal weight	18.42739726	TRUE	FALSE	0	0	4.02	2.27	1.59	40	0.53	4.6	5.1	17.52781588	0.820512821	115	69	FALSE	city_below_20	FALSE	average	FALSE	FALSE	FALSE	11	FALSE	64	13.4	25.14285714	1.366650268	0.305336091	-0.463513688	[ 0.387, 3.526]	[ 0.266, 5.061]	[-2.656,-0.455)	0.704	0.268
f	normal weight	18.09041096	TRUE	FALSE	0	0	4.11	2.38	1.71	42	0.73	4.7	5.3	18.80920625	0.823529412	111	62	FALSE	city_over_100	TRUE	average	FALSE	TRUE	FALSE	13	FALSE	70	12.5	20.21428571	0.339493982	-1.165906532	-0.09500422	[-0.484, 0.387)	[-2.114,-0.505)	[-0.455, 0.275)	0.566	0.25
m	normal weight	29.89863014	TRUE	FALSE	1	0	6.31	4.45	1.54	24	1.57	5.3	5.1	24.85795455	0.865384615	125	75	FALSE	village	FALSE	average	FALSE	TRUE	TRUE	7	FALSE	90	12.7	23.57142857	0.618724209	-0.798266245	1.188640823	[ 0.387, 3.526]	[-2.114,-0.505)	[ 0.275, 5.091]	0.66	0.254
m	overweight	18.41369863	TRUE	FALSE	0	0	4.57	2.86	1.51	33	1.21	5	5.2	28.72112107	0.980769231	117	69	FALSE	village	FALSE	average	FALSE	TRUE	FALSE	13	TRUE	102	5.6	11.85714286	0.590592962	-1.643260082	0.140473515	[ 0.387, 3.526]	[-2.114,-0.505)	[-0.455, 0.275)	0.332	0.112
f	normal weight	35.48493151	FALSE	FALSE	2	1	3.65	2.37	1.22	33	0.71	5.4	5	21.08	0.710784314	134	85	FALSE	city_20_100	TRUE	average	FALSE	FALSE	TRUE	17	FALSE	72.5	22.2	26.42857143	-0.401193058	0.493799603	-0.918277447	[-0.484, 0.387)	[ 0.266, 5.061]	[-2.656,-0.455)	0.74	0.444
f	obese	23.41917808	TRUE	FALSE	1	0	4.72	2.15	2.1	44	0.94	5.2	4.9	40.35	0.77443609	158	92	TRUE	village	FALSE	average	FALSE	FALSE	FALSE	11	TRUE	103	28.7	17.14285714	-0.118831198	-1.410752391	0.385307732	[-0.484, 0.387)	[-2.114,-0.505)	[ 0.275, 5.091]	0.48	0.574
m	obese	29.62191781	TRUE	FALSE	3	1	6.52	4.23	1.28	20	3.55	5.4	5.5	34.5600303	0.974137931	140	76	FALSE	city_20_100	TRUE	below_average	FALSE	FALSE	FALSE	9	TRUE	113	9.3	30.5	0.542708329	-1.266014962	0.489357248	[ 0.387, 3.526]	[-2.114,-0.505)	[ 0.275, 5.091]	0.854	0.186
f	overweight	32.91780822	TRUE	FALSE	0	0	5.59	3.95	1.29	23	1.13	4.9	5.1	26.19772472	0.65	110	80	TRUE	village	FALSE	average	FALSE	FALSE	FALSE	10	FALSE	65	21	9.142857143	-0.208499264	-0.320769026	-0.446355107	[-0.484, 0.387)	[-0.505, 0.266)	[-0.455, 0.275)	0.256	0.42
m	normal weight	27.03287671	TRUE	FALSE	1	0	4.59	3.32	1	22	1.07	5.2	4.8	22.85714286	0.791208791	123	71	FALSE	village	FALSE	average	FALSE	FALSE	FALSE	12	FALSE	72	16.8	16.35714286	0.480673038	-0.15943328	0.595923985	[ 0.387, 3.526]	[-0.505, 0.266)	[ 0.275, 5.091]	0.458	0.336
m	obese	26.5260274	TRUE	FALSE	3	1	5.71	4.2	1.28	22	1.56	6.2	4.9	37.37024221	0.966386555	160	108	FALSE	village	FALSE	average	FALSE	FALSE	FALSE	11	TRUE	115	12.4	22.28571429	0.178452178	-1.548771938	0.931610562	[-0.484, 0.387)	[-2.114,-0.505)	[ 0.275, 5.091]	0.624	0.248
m	normal weight	17.89315068	FALSE	FALSE	1	0	5.9	3.91	1.72	29	1.13	5.2	5.1	22.44	0.754901961	124	81	FALSE	city_below_20	FALSE	average	FALSE	FALSE	FALSE	13	FALSE	77	12.2	19	0.802636561	0.040279167	-0.60231432	[ 0.387, 3.526]	[-0.505, 0.266)	[-2.656,-0.455)	0.532	0.244
m	obese	28.59178082	FALSE	FALSE	1	0	4.36	2.93	1.04	24	1.56	4.3	5.4	31.41	0.86440678	138	75	FALSE	city_20_100	TRUE	average	FALSE	TRUE	TRUE	10	TRUE	102	17	19.64285714	-0.597569143	-0.121337226	-0.63314195	[-2.231,-0.484)	[-0.505, 0.266)	[-2.656,-0.455)	0.55	0.34
m	normal weight	27.97534247	TRUE	FALSE	2	1	5.39	2.89	2.21	41	0.86	4.7	4.9	24.42478899	0.830188679	130	87	FALSE	city_20_100	TRUE	average	FALSE	FALSE	TRUE	11	FALSE	88	32.8	16	-0.169189168	0.740080399	-0.053841681	[-0.484, 0.387)	[ 0.266, 5.061]	[-0.455, 0.275)	0.448	0.656
m	normal weight	32.18356164	FALSE	TRUE	1	0	3.76	2.28	1.38	37	0.8	5.1	4.9	24.86	0.924731183	138	80	FALSE	village	FALSE	average	FALSE	FALSE	TRUE	8	FALSE	86	16.6	31.07142857	1.664907431	-0.580283438	-0.578954144	[ 0.387, 3.526]	[-2.114,-0.505)	[-2.656,-0.455)	0.87	0.332
m	overweight	31.47945205	FALSE	FALSE	4	1	8.79	3.55	1.24	14	12.52	5.6	5.1	29	1	202	127	TRUE	city_20_100	TRUE	average	FALSE	TRUE	FALSE	8	FALSE	97	6	9.714285714	-0.349060526	-0.676537091	-0.834825797	[-0.484, 0.387)	[-2.114,-0.505)	[-2.656,-0.455)	0.272	0.12
m	normal weight	34.96986301	FALSE	FALSE	1	0	4.81	3.2	1.52	32	0.61	4.8	5	23.51	0.871287129	133	81	FALSE	city_over_100	TRUE	average	FALSE	TRUE	FALSE	10	FALSE	88	28.7	26.14285714	1.087518648	-0.296549275	-0.189210821	[ 0.387, 3.526]	[-0.505, 0.266)	[-0.455, 0.275)	0.732	0.574
m	overweight	34.11780822	FALSE	TRUE	1	0	4.53	3.01	1.42	31	0.59	5	5.1	27.78	0.818181818	125	88	FALSE	city_over_100	TRUE	above_average	TRUE	FALSE	TRUE	13	FALSE	90	13.4	17.21428571	0.183435854	-0.127800899	-0.281753945	[-0.484, 0.387)	[-0.505, 0.266)	[-0.455, 0.275)	0.482	0.268
m	normal weight	35.04657534	TRUE	FALSE	0	0	4.29	2.83	1.44	34	0.63	4.9	5.1	24.19081032	0.897196262	117	79	FALSE	city_over_100	TRUE	average	FALSE	FALSE	TRUE	12	FALSE	96	15.9	13.57142857	0.102756064	-0.739860922	-0.407700803	[-0.484, 0.387)	[-2.114,-0.505)	[-0.455, 0.275)	0.38	0.318
m	overweight	29.34794521	FALSE	FALSE	3	1	4.39	2.91	0.79	18	2.1	5.4	5.3	27.16	0.947916667	123	88	FALSE	city_over_100	TRUE	average	FALSE	FALSE	TRUE	13	FALSE	91	19.5	23.14285714	0.039925048	1.452458669	-0.870556756	[-0.484, 0.387)	[ 0.266, 5.061]	[-2.656,-0.455)	0.648	0.39
m	overweight	34.72054795	FALSE	FALSE	4	1	6.84	4.59	0.94	14	4.37	5.2	5.3	26.88	0.95049505	157	100	TRUE	city_over_100	TRUE	average	FALSE	TRUE	FALSE	6	FALSE	96	26.2	17.14285714	0.316816708	0.059792845	-0.796677367	[-0.484, 0.387)	[-0.505, 0.266)	[-2.656,-0.455)	0.48	0.524
m	normal weight	27.8109589	FALSE	FALSE	0	0	4.92	2.57	2.05	42	1.19	5.1	5.6	23.41	0.853932584	126	84	FALSE	city_over_100	TRUE	above_average	TRUE	FALSE	TRUE	16	FALSE	76	46.4	13.21428571	-0.203771797	3.448384395	0.564763283	[-0.484, 0.387)	[ 0.266, 5.061]	[ 0.275, 5.091]	0.37	0.928
m	obese	26.55342466	FALSE	FALSE	2	1	5.41	3.84	1.15	21	1.28	5.6	5.1	31.52	0.95412844	129	75	FALSE	city_over_100	TRUE	above_average	TRUE	TRUE	FALSE	8	TRUE	104	16.3	19.35714286	0.517415202	-0.766384348	-0.731169566	[ 0.387, 3.526]	[-2.114,-0.505)	[-2.656,-0.455)	0.542	0.326
m	overweight	33.4739726	FALSE	FALSE	1	0	5.94	4.21	1.36	23	1.5	5.3	5.1	27.17	0.916666667	128	79	TRUE	city_over_100	TRUE	average	FALSE	FALSE	FALSE	1	FALSE	88	12.2	23.07142857	2.456605381	0.421310457	-0.352825562	[ 0.387, 3.526]	[ 0.266, 5.061]	[-0.455, 0.275)	0.646	0.244
m	normal weight	23.12328767	TRUE	FALSE	3	1	5.46	3.83	1.34	25	0.79	5.7	5.1	24.16291615	0.778846154	137	83	FALSE	city_below_20	FALSE	average	FALSE	FALSE	FALSE	12	FALSE	81	14.5	19.71428571	0.966352713	-0.926755049	0.915344672	[ 0.387, 3.526]	[-2.114,-0.505)	[ 0.275, 5.091]	0.552	0.29
m	normal weight	34.54794521	FALSE	FALSE	1	0	4.46	2.42	1.86	42	0.75	5.4	4.6	24.69	0.944444444	149	90	FALSE	city_over_100	TRUE	average	FALSE	FALSE	TRUE	12	FALSE	85	8.3	33.57142857	0.779395858	-0.772802538	-1.242672799	[ 0.387, 3.526]	[-2.114,-0.505)	[-2.656,-0.455)	0.94	0.166
m	normal weight	23.63013699	TRUE	FALSE	0	0	3.85	2.51	1.11	29	0.68	4.4	4.5	23.30109483	0.852631579	124	61	FALSE	city_over_100	TRUE	average	FALSE	FALSE	TRUE	5	FALSE	81	15.6	26.71428571	0.425783281	-0.655700854	-0.266639056	[ 0.387, 3.526]	[-2.114,-0.505)	[-0.455, 0.275)	0.748	0.312
m	overweight	27.12876712	FALSE	FALSE	0	0	4.62	3.07	1.06	23	0.77	5.1	5.1	27.76	0.947916667	116	66	FALSE	village	FALSE	average	FALSE	TRUE	TRUE	12	FALSE	91	13	28.42857143	0.563122716	-0.059910994	0.259439135	[ 0.387, 3.526]	[-0.505, 0.266)	[-0.455, 0.275)	0.796	0.26
m	obese	31.71780822	TRUE	FALSE	3	1	7.52	2.35	0.6	8	13.58	5.4	5.1	36.03497164	1	129	84	TRUE	city_over_100	TRUE	average	FALSE	TRUE	FALSE	13	TRUE	109	8	15.85714286	-0.87208703	-1.311907575	0.258534761	[-2.231,-0.484)	[-2.114,-0.505)	[-0.455, 0.275)	0.444	0.16
f	normal weight	26.09589041	TRUE	TRUE	0	0	5.11	3.18	1.76	34	0.79	5.2	5.3	20.54988662	0.673469388	111	82	FALSE	city_over_100	TRUE	average	FALSE	FALSE	TRUE	10	FALSE	66	27.4	16.92857143	0.866708383	0.071261331	1.458342921	[ 0.387, 3.526]	[-0.505, 0.266)	[ 0.275, 5.091]	0.474	0.548
m	normal weight	28.16438356	FALSE	FALSE	2	1	4.47	2.99	1.02	23	0.66	6.1	5.4	23.44	0.815533981	108	70	TRUE	village	FALSE	average	FALSE	FALSE	FALSE	2	FALSE	84	6.2	31.64285714	0.897739867	-1.104080719	-1.42653685	[ 0.387, 3.526]	[-2.114,-0.505)	[-2.656,-0.455)	0.886	0.124
m	normal weight	32.42465753	FALSE	FALSE	1	0	6.27	4.11	1.62	26	0.53	5.5	5.3	23.67	0.934065934	111	73	FALSE	village	FALSE	average	FALSE	FALSE	FALSE	10	FALSE	85	3.8	20.5	0.511189957	-1.314885113	-1.406005886	[ 0.387, 3.526]	[-2.114,-0.505)	[-2.656,-0.455)	0.574	0.076
f	overweight	19.34520548	TRUE	FALSE	0	0	3.43	1.69	1.44	42	0.75	4.9	5.1	25.82644628	0.72972973	117	74	TRUE	city_over_100	TRUE	average	FALSE	FALSE	TRUE	9	FALSE	81	19.2	13.07142857	-0.120063811	-0.049641369	2.319168399	[-0.484, 0.387)	[-0.505, 0.266)	[ 0.275, 5.091]	0.366	0.384
m	overweight	28.80273973	TRUE	FALSE	2	1	4.75	2.94	1.21	25	1.92	5.3	5.3	28.40818411	0.876190476	146	91	FALSE	city_over_100	TRUE	above_average	TRUE	FALSE	TRUE	11	FALSE	92	10.5	20.64285714	0.062813109	-0.245407983	-1.305327347	[-0.484, 0.387)	[-0.505, 0.266)	[-2.656,-0.455)	0.578	0.21
m	normal weight	20.19452055	TRUE	FALSE	1	0	4.61	2.82	1.44	31	0.87	5.1	5.1	22.75830678	0.844444444	148	98	FALSE	city_over_100	TRUE	above_average	TRUE	FALSE	FALSE	11	FALSE	76	21.9	19	0.422343794	-0.205363099	-0.641670194	[ 0.387, 3.526]	[-0.505, 0.266)	[-2.656,-0.455)	0.532	0.438
m	normal weight	32.47945205	FALSE	FALSE	1	0	4.35	2.77	1.26	29	0.75	5.2	4.9	19.95	0.804347826	128	93	FALSE	city_below_20	FALSE	average	FALSE	TRUE	TRUE	13	FALSE	74	12.3	25.64285714	-0.387377826	-1.094725172	-0.297941804	[-0.484, 0.387)	[-2.114,-0.505)	[-0.455, 0.275)	0.718	0.246
m	normal weight	25.47123288	FALSE	FALSE	2	1	3.62	2.03	0.96	27	1.81	5.3	5.2	19.93	0.816326531	126	68	TRUE	city_20_100	TRUE	average	FALSE	TRUE	TRUE	7	FALSE	80	5.5	16.42857143	-0.384632822	-1.362098094	-0.646044	[-0.484, 0.387)	[-2.114,-0.505)	[-2.656,-0.455)	0.46	0.11
f	normal weight	32.47945205	TRUE	FALSE	1	0	4.01	2.17	1.58	39	0.79	5.6	4.8	19.27055864	0.779069767	100	68	TRUE	city_over_100	TRUE	above_average	TRUE	TRUE	TRUE	14	FALSE	67	21.2	10.07142857	-1.156606232	-0.400215025	0.26105728	[-2.231,-0.484)	[-0.505, 0.266)	[-0.455, 0.275)	0.282	0.424
m	normal weight	32.36438356	TRUE	TRUE	1	0	5.21	3.43	1.31	25	1.03	5.3	5.3	23.8898727	0.873684211	128	79	TRUE	city_over_100	TRUE	average	FALSE	FALSE	FALSE	12	FALSE	83	10.8	33.14285714	1.834578952	-0.175852218	0.627166887	[ 0.387, 3.526]	[-0.505, 0.266)	[ 0.275, 5.091]	0.928	0.216
m	obese	32.70410959	FALSE	FALSE	1	0	4.82	2.86	1.55	32	0.99	4.9	4.5	30	0.881818182	135	85	FALSE	city_over_100	TRUE	above_average	TRUE	FALSE	TRUE	11	FALSE	97	34.385975	5.214285714	-0.914188329	2.623186018	-0.621041548	[-2.231,-0.484)	[ 0.266, 5.061]	[-2.656,-0.455)	0.146	0.688823
f	normal weight	21.67123288	TRUE	FALSE	0	0	3.82	1.84	1.77	46	0.5	4.6	5	16.97465376	0.710843373	119	71	TRUE	city_over_100	TRUE	average	FALSE	FALSE	FALSE	5	FALSE	59	5.3	28.92857143	0.724534484	-0.811593115	1.897220152	[ 0.387, 3.526]	[-2.114,-0.505)	[ 0.275, 5.091]	0.81	0.106
f	normal weight	29.3890411	TRUE	TRUE	1	0	5.05	3.04	1.64	32	0.7	5	5.3	19.75987053	0.813953488	128	86	FALSE	village	FALSE	average	FALSE	FALSE	TRUE	11	FALSE	70	13.4	19.71428571	0.491528337	-0.034561086	-0.038762075	[ 0.387, 3.526]	[-0.505, 0.266)	[-0.455, 0.275)	0.552	0.268
m	normal weight	28.22465753	FALSE	FALSE	1	0	6.04	3.06	2.54	42	0.63	4.9	5	22.6	0.848837209	101	76	FALSE	city_below_20	FALSE	above_average	TRUE	FALSE	TRUE	18	FALSE	73	20.1	10.07142857	-0.382639383	1.795793294	-1.327712751	[-0.484, 0.387)	[ 0.266, 5.061]	[-2.656,-0.455)	0.282	0.402
f	normal weight	26.64383562	FALSE	FALSE	1	0	4.59	2.55	1.71	37	0.74	5.6	4.8	18.59	0.795180723	111	75	FALSE	city_20_100	TRUE	average	FALSE	TRUE	TRUE	13	FALSE	66	21.3	30.42857143	1.362258743	-0.50484841	-0.28660593	[ 0.387, 3.526]	[-0.505, 0.266)	[-0.455, 0.275)	0.852	0.426
m	normal weight	29.59726027	FALSE	FALSE	2	1	5	3.26	1.37	27	0.94	5.6	5.3	24.45	0.988888889	145	79	FALSE	city_over_100	TRUE	above_average	TRUE	TRUE	TRUE	0	FALSE	89	11.9	14.64285714	0.103992228	-0.100346984	-1.246047932	[-0.484, 0.387)	[-0.505, 0.266)	[-2.656,-0.455)	0.41	0.238
m	obese	32.6109589	FALSE	FALSE	5	1	6.14	4.19	0.79	13	3.81	5.9	5.2	38.64	1.018181818	144	86	FALSE	city_over_100	TRUE	average	FALSE	FALSE	TRUE	13	TRUE	112	14.2	14.14285714	-1.321219382	-1.3443139	-0.100350846	[-2.231,-0.484)	[-2.114,-0.505)	[-0.455, 0.275)	0.396	0.284
m	overweight	34.08493151	FALSE	FALSE	0	0	4.99	3.36	1.11	22	1.41	5.5	5.1	27.45	0.892156863	116	81	FALSE	city_over_100	TRUE	average	FALSE	TRUE	TRUE	15	FALSE	91	19.4	13.85714286	0.181813054	-0.198338209	-0.994974886	[-0.484, 0.387)	[-0.505, 0.266)	[-2.656,-0.455)	0.388	0.388
f	obese	33.79726027	TRUE	TRUE	2	1	6.24	4.1	1.26	20	2.48	5.1	4.9	31.8359375	0.834080717	125	78	FALSE	city_over_100	TRUE	average	FALSE	TRUE	TRUE	17	TRUE	93	34.2	14.35714286	-0.732790568	0.775772687	-0.398399049	[-2.231,-0.484)	[ 0.266, 5.061]	[-0.455, 0.275)	0.402	0.684
m	overweight	25.23013699	TRUE	FALSE	1	0	6.02	3.95	1.28	21	1.14	5.5	5.1	25.88057064	0.875	121	73	TRUE	city_over_100	TRUE	average	FALSE	FALSE	TRUE	15	FALSE	91	28.5	15.14285714	0.283470279	-0.417364863	0.64304523	[-0.484, 0.387)	[-0.505, 0.266)	[ 0.275, 5.091]	0.424	0.57
m	overweight	24.67945205	TRUE	FALSE	1	0	3.93	2.33	1.14	29	1.23	5.2	5.1	25.88057064	0.867924528	131	90	TRUE	city_over_100	TRUE	average	FALSE	FALSE	FALSE	9	FALSE	92	10.5	14.35714286	-0.146765903	-1.137125492	-0.485179618	[-0.484, 0.387)	[-2.114,-0.505)	[-2.656,-0.455)	0.402	0.21
f	normal weight	34.51506849	FALSE	TRUE	2	1	5.5	2.9	2.04	37	0.87	5.9	5.1	19.49	0.724137931	134	84	FALSE	city_below_20	FALSE	average	FALSE	FALSE	FALSE	15	FALSE	63	17.3	3.857142857	-1.663289161	-0.042583362	0.192955881	[-2.231,-0.484)	[-0.505, 0.266)	[-0.455, 0.275)	0.108	0.346
m	normal weight	35.63835616	TRUE	FALSE	1	0	5.18	2.26	2.79	54	0.85	4.6	5.3	16.37246415	0.802469136	128	82	TRUE	city_over_100	TRUE	average	FALSE	TRUE	FALSE	4	FALSE	65	17.4	45.35714286	1.704163278	-0.228856461	-0.443661448	[ 0.387, 3.526]	[-0.505, 0.266)	[-0.455, 0.275)	1.27	0.348
m	overweight	31.30136986	FALSE	FALSE	2	1	4.73	2.68	1.48	31	1.25	5.6	5.4	28.73	1	135	71	TRUE	village	FALSE	average	FALSE	FALSE	FALSE	13	FALSE	94	12	19.5	1.106309979	-0.041215493	-0.93818599	[ 0.387, 3.526]	[-0.505, 0.266)	[-2.656,-0.455)	0.546	0.24
m	overweight	34.07945205	FALSE	FALSE	0	0	4.43	1.93	2.26	51	0.45	5.4	5.2	26.26	0.947368421	116	77	TRUE	village	FALSE	average	FALSE	FALSE	FALSE	12	FALSE	90	9.4	25.35714286	0.482053644	-0.997526659	0.703573288	[ 0.387, 3.526]	[-2.114,-0.505)	[ 0.275, 5.091]	0.71	0.188
m	overweight	34.52054795	TRUE	TRUE	5	1	7.46	5.35	1.03	14	2.92	6.4	5.6	28.56761001	0.93	150	95	FALSE	city_over_100	TRUE	above_average	TRUE	FALSE	TRUE	7	FALSE	93	7.2	4.357142857	-0.504022755	-0.341546881	0.130965751	[-2.231,-0.484)	[-0.505, 0.266)	[-0.455, 0.275)	0.122	0.144
m	overweight	26.75342466	FALSE	FALSE	2	1	5.6	2.67	2.67	48	0.72	6.3	5.4	26.47	0.945652174	123	69	TRUE	village	FALSE	average	FALSE	TRUE	FALSE	11	FALSE	87	14.4	23.28571429	0.618052504	-0.872854865	-0.157822594	[ 0.387, 3.526]	[-2.114,-0.505)	[-0.455, 0.275)	0.652	0.288
m	normal weight	34.18356164	TRUE	TRUE	3	1	7.9	5.63	1.53	19	2.25	5.5	5.1	23.91581633	0.926315789	130	80	TRUE	city_20_100	TRUE	average	FALSE	FALSE	TRUE	7	FALSE	88	14.2	19.21428571	0.129888771	-1.21009696	-1.219083243	[-0.484, 0.387)	[-2.114,-0.505)	[-2.656,-0.455)	0.538	0.284
m	normal weight	32.16712329	FALSE	FALSE	1	0	4.89	3.4	1.58	32	0.88	5.9	5.2	23.37	0.9	121	79	FALSE	village	FALSE	above_average	TRUE	FALSE	TRUE	15	FALSE	81	9.4	11.85714286	-0.605061748	0.099568202	-2.274326025	[-2.231,-0.484)	[-0.505, 0.266)	[-2.656,-0.455)	0.332	0.188
m	normal weight	23.59178082	TRUE	FALSE	2	1	5.58	3.79	1.47	26	0.52	5.4	5.4	21.97265625	0.906976744	149	81	TRUE	city_20_100	TRUE	average	FALSE	TRUE	FALSE	11	FALSE	78	14.1	19.42857143	0.844456579	-0.91122924	0.351548841	[ 0.387, 3.526]	[-2.114,-0.505)	[ 0.275, 5.091]	0.544	0.282
f	normal weight	28.03835616	TRUE	FALSE	0	0	5.27	3.28	1.68	32	1.01	4.7	4.9	22.63259093	0.896103896	122	73	FALSE	city_over_100	TRUE	average	FALSE	FALSE	TRUE	14	FALSE	69	19.4	5.857142857	-1.859525808	0.306972456	-0.034258475	[-2.231,-0.484)	[ 0.266, 5.061]	[-0.455, 0.275)	0.164	0.388
f	normal weight	21.58356164	FALSE	FALSE	0	0	5.79	3.58	2.06	36	1.03	4.7	4.5	20.69	0.882352941	115	64	FALSE	city_over_100	TRUE	average	FALSE	FALSE	FALSE	15	FALSE	75	28.8	25	0.584912225	0.053564356	1.343057294	[ 0.387, 3.526]	[-0.505, 0.266)	[ 0.275, 5.091]	0.7	0.576
m	obese	35.81917808	TRUE	FALSE	4	1	7.7	4.64	1.02	13	6.04	5.4	5.3	31.97148031	1	133	91	FALSE	village	FALSE	above_average	TRUE	FALSE	TRUE	9	TRUE	115	12.6	45.57142857	2.358604243	0.403584913	-0.863042088	[ 0.387, 3.526]	[ 0.266, 5.061]	[-2.656,-0.455)	1.276	0.252
f	overweight	24.97808219	TRUE	TRUE	0	0	5.2	2.74	2.44	47	0.62	5	5.2	26.33288875	0.837837838	127	71	FALSE	village	FALSE	average	FALSE	TRUE	TRUE	15	TRUE	93	33.8	5.928571429	-1.089006096	0.437954352	-0.315088935	[-2.231,-0.484)	[ 0.266, 5.061]	[-0.455, 0.275)	0.166	0.676
m	normal weight	18.53424658	TRUE	FALSE	0	0	3.65	2	1.44	20	0.57	4.5	5.2	21.383942	0.74742268	120	65	TRUE	city_below_20	FALSE	average	FALSE	FALSE	FALSE	9	FALSE	72.5	2.8	28.42857143	1.18702896	-0.37274032	-1.170078487	[ 0.387, 3.526]	[-0.505, 0.266)	[-2.656,-0.455)	0.796	0.056
m	normal weight	24.51506849	TRUE	FALSE	1	0	3.78	2.39	1.21	32	0.73	5	5.1	24.8791787	0.768867925	145	88	FALSE	city_over_100	TRUE	above_average	TRUE	FALSE	FALSE	23	FALSE	81.5	36.7	14.35714286	-1.337909365	1.220270112	0.875839883	[-2.231,-0.484)	[ 0.266, 5.061]	[ 0.275, 5.091]	0.402	0.734
m	normal weight	22.60273973	TRUE	FALSE	1	0	3.58	1.98	1.38	38	0.76	4.9	4.9	23.81300219	0.82	133	86	FALSE	city_over_100	TRUE	above_average	TRUE	FALSE	TRUE	15	FALSE	82	31.7	7.428571429	-1.104900304	0.825181364	1.230359898	[-2.231,-0.484)	[ 0.266, 5.061]	[ 0.275, 5.091]	0.208	0.634
m	normal weight	35.73424658	TRUE	FALSE	0	0	4.44	2.13	2.3	52	0.46	5	4.8	23.41311134	0.782178218	125	84	FALSE	city_over_100	TRUE	average	FALSE	FALSE	FALSE	14	FALSE	79	20.9	31.92857143	0.312853756	-0.941677464	-0.097149298	[-0.484, 0.387)	[-2.114,-0.505)	[-0.455, 0.275)	0.894	0.418
m	obese	34.85205479	TRUE	FALSE	1	0	4.51	2.16	2.31	51	0.48	5	4.8	32.54800084	0.927272727	135	80	FALSE	city_over_100	TRUE	average	FALSE	FALSE	FALSE	12	TRUE	102	14.9	33.85714286	2.887203691	1.574436426	-1.585282661	[ 0.387, 3.526]	[ 0.266, 5.061]	[-2.656,-0.455)	0.948	0.298
m	normal weight	33.02465753	FALSE	FALSE	0	0	4.84	2.94	1.75	36	0.53	4.8	5.2	18.3	0.879518072	120	65	FALSE	city_20_100	TRUE	average	FALSE	FALSE	TRUE	8	FALSE	73	15.4	16.35714286	0.050384023	0.882615402	0.477563608	[-0.484, 0.387)	[ 0.266, 5.061]	[ 0.275, 5.091]	0.458	0.308
m	obese	25.96986301	TRUE	TRUE	1	0	5.15	3.46	1.15	22	1.67	5.4	5.4	30.78884549	0.908333333	170	90	TRUE	city_over_100	TRUE	average	FALSE	FALSE	FALSE	9	TRUE	109	26.7	8.214285714	-0.499352817	-0.305509075	1.169483744	[-2.231,-0.484)	[-0.505, 0.266)	[ 0.275, 5.091]	0.23	0.534
m	overweight	21.5890411	TRUE	FALSE	3	1	5.27	3.71	1.17	22	1.94	4.8	4.9	25.13593926	0.88172043	130	80	FALSE	city_20_100	TRUE	average	FALSE	FALSE	FALSE	11	FALSE	82	12.4	20.57142857	0.98404895	-0.287505307	-0.516044617	[ 0.387, 3.526]	[-0.505, 0.266)	[-2.656,-0.455)	0.576	0.248
m	overweight	31.81917808	TRUE	FALSE	2	1	5.87	3.97	1.69	29	0.53	5.5	5.3	26.59266967	0.836363636	152	95	FALSE	city_over_100	TRUE	average	FALSE	FALSE	TRUE	12	FALSE	92	30.6	38.35714286	2.720432088	1.157350772	2.003064909	[ 0.387, 3.526]	[ 0.266, 5.061]	[ 0.275, 5.091]	1.074	0.612
m	overweight	34.98630137	TRUE	FALSE	0	0	4.69	2.99	1.52	32	0.71	4.8	5	25.29194126	0.869158879	123	80	FALSE	city_20_100	TRUE	above_average	TRUE	FALSE	TRUE	10	FALSE	93	26.3	16.64285714	-0.910948141	-0.390383271	0.683791012	[-2.231,-0.484)	[-0.505, 0.266)	[ 0.275, 5.091]	0.466	0.526
m	overweight	26.51232877	TRUE	TRUE	2	1	5.36	3.05	2.22	41	0.93	4.3	5	26.0932752	0.828282828	130	58	TRUE	city_over_100	TRUE	average	FALSE	FALSE	TRUE	9	FALSE	82	26.4	11.21428571	-0.383923796	1.434900892	1.307625294	[-0.484, 0.387)	[ 0.266, 5.061]	[ 0.275, 5.091]	0.314	0.528
m	overweight	32.32054795	TRUE	FALSE	2	1	5.27	3.86	0.98	19	1.37	5.3	5.2	25.66	0.839622642	111	79	FALSE	city_over_100	TRUE	above_average	TRUE	TRUE	TRUE	15	FALSE	89	18.3	21.07142857	-0.667041319	-0.259597337	-0.184182898	[-2.231,-0.484)	[-0.505, 0.266)	[-0.455, 0.275)	0.59	0.366
m	overweight	26.16164384	TRUE	FALSE	2	1	5.19	3.54	1.44	28	1.03	6	5.1	25.64024297	0.811320755	115	65	FALSE	city_over_100	TRUE	average	FALSE	TRUE	FALSE	10	FALSE	86	15.2	30.21428571	0.2301916	-0.231247981	0.99050416	[-0.484, 0.387)	[-0.505, 0.266)	[ 0.275, 5.091]	0.846	0.304
m	overweight	27.73424658	TRUE	FALSE	5	1	8.4	5.15	0.9	11	7.45	5.6	5.291	27.17063157	0.948979592	157	97	TRUE	city_below_20	FALSE	average	FALSE	TRUE	FALSE	8	FALSE	93	10.4	10.35714286	-0.440307113	-1.609905271	-0.589906456	[-0.484, 0.387)	[-2.114,-0.505)	[-2.656,-0.455)	0.29	0.208
f	overweight	24.47671233	TRUE	FALSE	1	0	6.25	4.43	1.44	23	1.58	5.1	5.0412	26.7299275	0.845360825	146	100	FALSE	city_below_20	FALSE	average	FALSE	TRUE	TRUE	19	FALSE	82	13.4	16.42857143	0.482701135	-0.596989288	0.33706009	[ 0.387, 3.526]	[-2.114,-0.505)	[ 0.275, 5.091]	0.46	0.268
f	normal weight	32.83013699	TRUE	TRUE	1	0	4.85	3.29	1.22	25	0.88	5.1	4.8	20.07733492	0.9125	120	80	TRUE	city_over_100	TRUE	average	FALSE	FALSE	TRUE	13	FALSE	73	26.3	13.35714286	-0.425394077	-0.028055073	-0.734880005	[-0.484, 0.387)	[-0.505, 0.266)	[-2.656,-0.455)	0.374	0.526
f	normal weight	24.91506849	TRUE	FALSE	0	0	5.8	2.78	2.85	49	0.8	4.9	5	17.63085399	0.820512821	108	74	FALSE	city_over_100	TRUE	above_average	TRUE	FALSE	FALSE	16	FALSE	64	7.7	18.78571429	0.460912946	0.030825007	-0.302023525	[ 0.387, 3.526]	[-0.505, 0.266)	[-0.455, 0.275)	0.526	0.154
m	overweight	23.67123288	TRUE	FALSE	0	0	4.95	2.91	1.69	34	0.54	5.4	5.1	27.59183673	0.819047619	114	75	TRUE	city_over_100	TRUE	average	FALSE	FALSE	TRUE	5	FALSE	86	20.1	16.14285714	-0.43351896	-1.07229477	0.750763209	[-0.484, 0.387)	[-2.114,-0.505)	[ 0.275, 5.091]	0.452	0.402
m	obese	34.32876712	TRUE	FALSE	2	1	4.05	2.61	1.09	27	0.8	6	5.5	30.21885779	0.881818182	140	90	FALSE	village	FALSE	above_average	TRUE	FALSE	TRUE	10	FALSE	97	18.8	9.428571429	-0.409725739	0.066504167	-0.066175711	[-0.484, 0.387)	[-0.505, 0.266)	[-0.455, 0.275)	0.264	0.376
f	normal weight	30.7260274	TRUE	FALSE	1	0	6.14	3.58	2.27	37	0.57	4	4.8	20.28479857	0.720430108	130	85	FALSE	city_over_100	TRUE	average	FALSE	TRUE	FALSE	8	FALSE	67	20.1	19.57142857	-0.070121215	-0.599265379	0.297948528	[-0.484, 0.387)	[-2.114,-0.505)	[ 0.275, 5.091]	0.548	0.402
f	normal weight	22.51232877	TRUE	FALSE	1	0	4.37	2.58	1.44	33	1.18	5.7	5.1	21.71925011	0.722222222	112	72	FALSE	city_20_100	TRUE	average	FALSE	FALSE	TRUE	8	FALSE	65	21.7	7.428571429	-0.89810454	0.213706295	-0.561467111	[-2.231,-0.484)	[-0.505, 0.266)	[-2.656,-0.455)	0.208	0.434
f	normal weight	31.33972603	TRUE	FALSE	1	0	4.47	2.32	1.93	43	1.13	5.2	5.2	23.58832922	0.835051546	128	89	FALSE	city_over_100	TRUE	average	FALSE	FALSE	TRUE	14	FALSE	81	43.5	17.42857143	-0.671681785	0.292673242	2.347098432	[-2.231,-0.484)	[ 0.266, 5.061]	[ 0.275, 5.091]	0.488	0.87
f	normal weight	35.53972603	TRUE	FALSE	0	0	4.26	2.26	1.92	45	0.45	5.2	4.8	23.05175491	0.724489796	109	67	FALSE	village	FALSE	average	FALSE	FALSE	TRUE	11	FALSE	71	27	24.07142857	-0.460924005	0.086187124	0.459230776	[-0.484, 0.387)	[-0.505, 0.266)	[ 0.275, 5.091]	0.674	0.54
f	overweight	26.6739726	TRUE	FALSE	0	0	5.52	3.57	1.67	30	1.11	5	5	25.62195782	0.752380952	127	74	FALSE	city_over_100	TRUE	average	FALSE	FALSE	TRUE	10	FALSE	79	32.7	12.85714286	-0.262977953	0.491279464	-0.835503461	[-0.484, 0.387)	[ 0.266, 5.061]	[-2.656,-0.455)	0.36	0.654
f	normal weight	31.74794521	TRUE	FALSE	1	0	4.58	2.6	1.62	35	0.72	5.2	5	20.8	0.715789474	140	90	TRUE	city_over_100	TRUE	above_average	TRUE	FALSE	TRUE	14	FALSE	68	22.4	17.64285714	-0.754137064	-0.047917664	0.561739815	[-2.231,-0.484)	[-0.505, 0.266)	[ 0.275, 5.091]	0.494	0.448
f	normal weight	22.24109589	TRUE	FALSE	1	0	5.7	3.62	1.75	31	0.73	4.1	4.9	22.37567995	0.75862069	135	91	FALSE	village	FALSE	average	FALSE	FALSE	FALSE	14	FALSE	66	16.2	10	-1.106318294	-0.121600067	-0.331598723	[-2.231,-0.484)	[-0.505, 0.266)	[-0.455, 0.275)	0.28	0.324
f	normal weight	35.92054795	TRUE	FALSE	0	0	4.78	3.04	1.48	31	0.49	5	5	20.01549587	0.744680851	104	71	FALSE	city_20_100	TRUE	average	FALSE	FALSE	TRUE	11	FALSE	70	21.3	12.28571429	-0.249965831	0.022988642	1.420296962	[-0.484, 0.387)	[-0.505, 0.266)	[ 0.275, 5.091]	0.344	0.426
m	normal weight	23.41643836	TRUE	FALSE	0	0	4.34	2.78	1.27	29	1.01	4.7	4.9	24.32098765	0.862745098	127	82	FALSE	village	FALSE	average	FALSE	FALSE	TRUE	8	FALSE	88	14.5	14.29742857	-0.800346085	-1.289741064	-0.146661794	[-2.231,-0.484)	[-2.114,-0.505)	[-0.455, 0.275)	0.40197	0.29
f	normal weight	30.10410959	FALSE	FALSE	1	0	6.05	3.65	2.04	34	0.98	4.9	5.1	19.66	0.673469388	119	91	FALSE	city_over_100	TRUE	average	FALSE	FALSE	TRUE	10	FALSE	66	33.8508	6.642857143	-1.73319841	0.555863903	0.785915496	[-2.231,-0.484)	[ 0.266, 5.061]	[ 0.275, 5.091]	0.186	0.675952
m	normal weight	30.24109589	FALSE	FALSE	0	0	3.99	1.89	1.8	45	1.38	5.1	5.2	20.78	0.81372549	124	83	FALSE	city_below_20	FALSE	above_average	TRUE	FALSE	TRUE	13	FALSE	83	29.6	13.85714286	-0.880723456	0.328996485	1.992348424	[-2.231,-0.484)	[ 0.266, 5.061]	[ 0.275, 5.091]	0.388	0.592
f	normal weight	32.4109589	TRUE	FALSE	0	0	3.39	1.93	2.37	70	0.65	5	5.08	22.65625	0.744897959	104	72	FALSE	city_over_100	TRUE	above_average	TRUE	FALSE	TRUE	12	FALSE	73	23.034275	3.714285714	-1.378438329	-0.212182515	0.339684926	[-2.231,-0.484)	[-0.505, 0.266)	[ 0.275, 5.091]	0.104	0.461648
f	normal weight	22.58082192	TRUE	FALSE	0	0	5.18	3.04	1.98	38	0.2	4.6	4.5	21.37864366	0.766304348	125	81	FALSE	city_20_100	TRUE	average	FALSE	FALSE	TRUE	11	FALSE	70.5	10.6	11.78571429	-1.720318312	-0.585857505	-1.192273186	[-2.231,-0.484)	[-2.114,-0.505)	[-2.656,-0.455)	0.33	0.212
m	normal weight	35.47671233	TRUE	FALSE	3	1	5.4	3.39	1.37	25	2.62	5.5	5.2	20.97370855	0.869565217	174	112	TRUE	city_over_100	TRUE	average	FALSE	FALSE	TRUE	11	FALSE	80	8.7	14.5	0.777333711	-1.576343738	-1.015192403	[ 0.387, 3.526]	[-2.114,-0.505)	[-2.656,-0.455)	0.406	0.174
f	normal weight	24.50136986	TRUE	FALSE	0	0	6.07	4.26	1.55	26	0.69	5.4	5	20.68515024	0.784946237	115	71	FALSE	city_20_100	TRUE	average	FALSE	FALSE	TRUE	13	FALSE	73	10.1	12.5	-0.684283682	-0.957121815	-0.611158931	[-2.231,-0.484)	[-2.114,-0.505)	[-2.656,-0.455)	0.35	0.202
f	obese	30.19178082	TRUE	TRUE	2	1	3.91	2.31	1.13	29	0.81	6.4	5.6	32	0.872881356	119	69	FALSE	city_over_100	TRUE	average	FALSE	FALSE	FALSE	6	TRUE	103	50.3	18.71428571	1.826914689	5.061248999	-2.335124886	[ 0.387, 3.526]	[ 0.266, 5.061]	[-2.656,-0.455)	0.524	1.006
m	overweight	31.76164384	TRUE	TRUE	1	0	5.05	3.14	1.33	26	1.54	5.2	5.5	28.59675713	0.971698113	146	105	TRUE	village	FALSE	average	FALSE	FALSE	FALSE	7	TRUE	103	23.8	15.35714286	2.926113863	2.977779464	-1.815245791	[ 0.387, 3.526]	[ 0.266, 5.061]	[-2.656,-0.455)	0.43	0.476
f	overweight	32.68767123	TRUE	FALSE	3	1	5.67	4.37	1.05	19	1.76	5.1	5.4	26.0930309	0.846153846	125	85	TRUE	city_below_20	FALSE	average	FALSE	TRUE	FALSE	9	TRUE	88	15.5	13.35714286	0.155000859	-0.903437314	-0.822175196	[-0.484, 0.387)	[-2.114,-0.505)	[-2.656,-0.455)	0.374	0.31
m	normal weight	30.08493151	TRUE	FALSE	1	0	4.11	1.66	2.25	55	0.68	5.4	5.3	20.07	0.8125	165	97	TRUE	city_below_20	FALSE	average	FALSE	FALSE	FALSE	15	FALSE	78	12.7	17.71428571	1.634371581	-0.769783025	-0.822722303	[ 0.387, 3.526]	[-2.114,-0.505)	[-2.656,-0.455)	0.496	0.254
m	overweight	33.59452055	TRUE	FALSE	2	1	4.95	3.28	1.38	28	1.53	5.7	5.7	26.51180407	0.913461538	126	89	FALSE	city_20_100	TRUE	average	FALSE	TRUE	FALSE	9	FALSE	95	1.8	6.142857143	1.363053271	-1.938287975	-1.452619384	[ 0.387, 3.526]	[-2.114,-0.505)	[-2.656,-0.455)	0.172	0.036
f	normal weight	32.33150685	TRUE	FALSE	0	0	5.72	2.94	2.45	43	1.13	5.2	5.2	15.14960232	0.844155844	118	79	FALSE	city_over_100	TRUE	average	FALSE	FALSE	TRUE	9	FALSE	65	12.2	8.642857143	-0.630780451	-1.100523352	1.698067655	[-2.231,-0.484)	[-2.114,-0.505)	[ 0.275, 5.091]	0.242	0.244
m	normal weight	33.33972603	FALSE	FALSE	2	1	5.3	3.89	1.12	21	1.42	5	5.3	24.18	0.842592593	131	84	FALSE	village	FALSE	average	FALSE	FALSE	FALSE	13	FALSE	91	19.8	24.64285714	0.370768832	-0.949492925	0.280913312	[-0.484, 0.387)	[-2.114,-0.505)	[ 0.275, 5.091]	0.69	0.396
m	obese	32.64109589	TRUE	FALSE	3	1	7.09	5	1.83	26	1.37	5.6	5	30.86419753	0.980582524	127	87	FALSE	city_20_100	TRUE	above_average	TRUE	FALSE	FALSE	9	FALSE	101	19.5	9.642857143	-0.570749363	0.932219375	0.142158821	[-2.231,-0.484)	[ 0.266, 5.061]	[-0.455, 0.275)	0.27	0.39
f	normal weight	35.73424658	TRUE	FALSE	0	0	4.93	2.88	2.08	42	0.39	5.3	5	19.37919743	0.870588235	127	80	FALSE	city_over_100	TRUE	average	FALSE	TRUE	TRUE	13	FALSE	74	21.5	19.21428571	0.188045289	0.969186712	-1.711920187	[-0.484, 0.387)	[ 0.266, 5.061]	[-2.656,-0.455)	0.538	0.43
m	overweight	30.44109589	TRUE	FALSE	1	0	4.51	2.76	1.33	29	1.09	5	4.4	26.27728508	0.79245283	130	80	FALSE	city_20_100	TRUE	above_average	TRUE	FALSE	TRUE	14	FALSE	84	22.8	6.642857143	-1.009312849	0.272549695	0.248103144	[-2.231,-0.484)	[ 0.266, 5.061]	[-0.455, 0.275)	0.186	0.456
m	overweight	29.38356164	TRUE	FALSE	4	1	5.6	3.95	1.33	24	1.75	5.6	5.2	27.7488727	0.884955752	140	85	FALSE	city_over_100	TRUE	average	FALSE	TRUE	FALSE	16	FALSE	100	14.1	28.5	0.971964468	-1.126370198	-0.247777274	[ 0.387, 3.526]	[-2.114,-0.505)	[-0.455, 0.275)	0.798	0.282
f	normal weight	29.06849315	TRUE	FALSE	0	0	5.33	3.74	1.52	29	0.69	4.7	5	22.94811574	0.747474747	114	84	FALSE	city_over_100	TRUE	above_average	TRUE	FALSE	TRUE	10	FALSE	74	36.3	22.28571429	0.703683375	0.841752154	0.918425347	[ 0.387, 3.526]	[ 0.266, 5.061]	[ 0.275, 5.091]	0.624	0.726
m	obese	28.98356164	TRUE	FALSE	5	1	6.34	4.4	0.96	15	3.9	6.8	5.1	36.33240851	1.036697248	140	95	FALSE	city_20_100	TRUE	average	FALSE	FALSE	FALSE	13	TRUE	113	3.1	13	-0.56489922	-1.762198064	-0.340081362	[-2.231,-0.484)	[-2.114,-0.505)	[-0.455, 0.275)	0.364	0.062
m	normal weight	30.01369863	FALSE	FALSE	2	1	4.5	3	1.37	30	0.68	5.6	5.2	23.5	0.9625	130	90	FALSE	city_over_100	TRUE	above_average	TRUE	FALSE	TRUE	24	FALSE	77	60.3	22.78571429	1.63821562	4.185076044	-0.228410739	[ 0.387, 3.526]	[ 0.266, 5.061]	[-0.455, 0.275)	0.638	1.206
f	normal weight	25.66027397	TRUE	FALSE	1	0	4.53	3.09	1.28	28	0.52	4.9	5.1	23.183391	0.847058824	118	84	TRUE	city_20_100	TRUE	average	FALSE	FALSE	FALSE	10	FALSE	72	33.7	8.785714286	-0.967539877	-0.57667311	-0.015959001	[-2.231,-0.484)	[-2.114,-0.505)	[-0.455, 0.275)	0.246	0.674
f	normal weight	33.07123288	FALSE	FALSE	0	0	4.42	2.56	1.61	36	0.79	5.1	5.1	23.44	0.893939394	111	76	TRUE	city_over_100	TRUE	above_average	TRUE	FALSE	TRUE	7	FALSE	59	32.8	14.92857143	-0.443746468	0.297499963	-0.286572739	[-0.484, 0.387)	[ 0.266, 5.061]	[-0.455, 0.275)	0.418	0.656
f	normal weight	25.32876712	FALSE	FALSE	0	0	5.12	3.52	1.47	29	0.93	5	4.9	21.87	0.877777778	109	76	FALSE	city_over_100	TRUE	average	FALSE	FALSE	TRUE	6	FALSE	79	24.5	14.42857143	-0.591983359	-0.583964171	-0.182003719	[-2.231,-0.484)	[-2.114,-0.505)	[-0.455, 0.275)	0.404	0.49
m	overweight	25.88493151	TRUE	FALSE	2	1	5.44	3.83	1.43	26	0.52	5	5.2	25.18238149	0.882352941	132	79	TRUE	city_20_100	TRUE	above_average	TRUE	TRUE	TRUE	12	FALSE	75	10.8	17.57142857	-0.180070311	-1.224021351	-0.181866935	[-0.484, 0.387)	[-2.114,-0.505)	[-0.455, 0.275)	0.492	0.216
f	normal weight	34.76164384	TRUE	FALSE	1	0	5.14	2.74	2.26	44	0.98	5.6	4.7	20.01836547	0.752688172	123	76	FALSE	village	FALSE	average	FALSE	FALSE	FALSE	15	FALSE	70	17.6	16.85714286	-0.636281674	-1.826841302	2.992249702	[-2.231,-0.484)	[-2.114,-0.505)	[ 0.275, 5.091]	0.472	0.352
m	overweight	34.59178082	TRUE	FALSE	1	0	4.95	3.25	1.36	27	0.77	5.4	5.3	28.85802469	1	139	83	FALSE	city_over_100	TRUE	above_average	TRUE	TRUE	TRUE	15	FALSE	101	15.7	13.5	1.016664399	1.003034409	-2.053728549	[ 0.387, 3.526]	[ 0.266, 5.061]	[-2.656,-0.455)	0.378	0.314
m	overweight	27.11780822	TRUE	FALSE	1	0	2.13	1.68	0.58	27	0.92	3.4	4.9	26.0351054	0.824074074	115	60	TRUE	village	FALSE	above_average	TRUE	FALSE	FALSE	11	FALSE	89	9.7	14.07142857	0.529625533	-1.643940588	0.388204635	[ 0.387, 3.526]	[-2.114,-0.505)	[ 0.275, 5.091]	0.394	0.194
f	normal weight	30.80273973	TRUE	TRUE	0	0	6.57	4.5	1.9	29	0.95	4.8	5	18.54030589	0.681818182	108	73	TRUE	city_20_100	TRUE	average	FALSE	FALSE	FALSE	14	FALSE	60	33.8	6.928571429	-0.730719454	0.036284135	0.499375765	[-2.231,-0.484)	[-0.505, 0.266)	[ 0.275, 5.091]	0.194	0.676
m	overweight	34.02465753	TRUE	TRUE	2	1	5.97	4.32	1.16	19	1.63	5.3	5	25.51020408	0.913043478	141	82	FALSE	city_below_20	FALSE	average	FALSE	FALSE	TRUE	10	FALSE	84	15.2	21	0.226482885	-0.395693085	-0.245031051	[-0.484, 0.387)	[-0.505, 0.266)	[-0.455, 0.275)	0.588	0.304
f	normal weight	19.49315068	TRUE	FALSE	0	0	6.92	5.09	1.44	21	0.86	4.4	4.8	19.15119182	0.806296458	118.563	74.095	FALSE	village	FALSE	above_average	TRUE	FALSE	FALSE	17	FALSE	73.76	33.5	26.42857143	1.476806385	0.465654799	0.615416064	[ 0.387, 3.526]	[ 0.266, 5.061]	[ 0.275, 5.091]	0.74	0.67
m	obese	31.92054795	TRUE	TRUE	5	1	7.35	4.87	0.87	12	5.32	5.9	5.2	33.05760174	0.982142857	170	111	FALSE	city_over_100	TRUE	above_average	TRUE	TRUE	TRUE	16	TRUE	110	36.4	22.64285714	0.802778186	0.797739356	1.043170143	[ 0.387, 3.526]	[ 0.266, 5.061]	[ 0.275, 5.091]	0.634	0.728
m	overweight	24.69863014	TRUE	FALSE	1	0	4.91	3.05	1.47	30	0.81	5.5	4.9	26.44628099	0.836538462	147	92	FALSE	city_20_100	TRUE	average	FALSE	TRUE	FALSE	5	FALSE	87	32.1	30.78571429	1.565862762	0.388636206	0.155819985	[ 0.387, 3.526]	[ 0.266, 5.061]	[-0.455, 0.275)	0.862	0.642
m	normal weight	29.49863014	TRUE	TRUE	1	0	3.69	1.71	1.93	52	0.37	5	4.8	20.89795918	1.2	117	88	TRUE	city_over_100	TRUE	average	FALSE	TRUE	FALSE	11	FALSE	96	14.4	28.14285714	1.393372592	0.315131272	-1.132474354	[ 0.387, 3.526]	[ 0.266, 5.061]	[-2.656,-0.455)	0.788	0.288
f	normal weight	28.07945205	TRUE	TRUE	0	0	3.98	1.73	1.85	46	1.14	5.3	4.8	22.72189349	0.762886598	129	84	TRUE	city_over_100	TRUE	average	FALSE	TRUE	FALSE	12	FALSE	74	22	6.285714286	-0.548758334	-0.47245664	0.185233996	[-2.231,-0.484)	[-0.505, 0.266)	[-0.455, 0.275)	0.176	0.44
f	normal weight	22.43835616	TRUE	FALSE	0	0	4.9	1.85	2.48	51	1.11	4.9	4.6	21.78996599	0.712871287	119	72	FALSE	village	FALSE	average	FALSE	FALSE	FALSE	10	FALSE	72	12.5	7.428571429	-1.059142158	-0.428509909	-0.798612576	[-2.231,-0.484)	[-0.505, 0.266)	[-2.656,-0.455)	0.208	0.25
f	normal weight	23.61917808	TRUE	TRUE	1	0	5.48	2.95	1.73	32	2.34	4.7	4.8	22.93337068	0.76	121	74	TRUE	city_20_100	TRUE	average	FALSE	TRUE	TRUE	10	FALSE	76	19.3	14.35714286	-0.289381053	0.220692555	-0.096177581	[-0.484, 0.387)	[-0.505, 0.266)	[-0.455, 0.275)	0.402	0.386
m	overweight	25.03013699	TRUE	FALSE	2	1	4.93	3.12	1.08	22	2.24	5	4.8	29.13295496	0.948453608	134	80	FALSE	city_over_100	TRUE	average	FALSE	FALSE	TRUE	15	FALSE	92	13.1	10.78571429	-0.750895489	0.477492008	-0.0678811	[-2.231,-0.484)	[ 0.266, 5.061]	[-0.455, 0.275)	0.302	0.262
f	overweight	34.77260274	TRUE	FALSE	0	0	6.54	4.16	2.02	31	0.77	5.4	5	26.42356982	0.836734694	122	82	FALSE	city_over_100	TRUE	above_average	TRUE	FALSE	TRUE	13	FALSE	82	33.9	11.78571429	-0.508441038	1.424987922	-0.849365103	[-2.231,-0.484)	[ 0.266, 5.061]	[-2.656,-0.455)	0.33	0.678
m	normal weight	23.98630137	TRUE	TRUE	0	0	4.79	2.6	1.97	41	1.13	5	4.7	24.85795455	1.166666667	122	74	FALSE	city_20_100	TRUE	average	FALSE	FALSE	TRUE	11	FALSE	70	19.8	13.35714286	-1.151701491	-1.019650698	-0.000206025	[-2.231,-0.484)	[-2.114,-0.505)	[-0.455, 0.275)	0.374	0.396
f	normal weight	33.02465753	TRUE	FALSE	0	0	5.68	3.16	2.23	39	1.56	4.9	4.7	20.76124567	0.855421687	104	75	FALSE	city_over_100	TRUE	above_average	TRUE	FALSE	TRUE	15	FALSE	71	24.1	15.35714286	-0.212403403	0.217264873	-0.420526286	[-0.484, 0.387)	[-0.505, 0.266)	[-0.455, 0.275)	0.43	0.482
f	normal weight	27.3890411	TRUE	FALSE	1	0	3.93	1.6	1.9	48	0.6	5	5.1	24.22	0.894117647	149	103	FALSE	city_over_100	TRUE	average	FALSE	FALSE	FALSE	15	FALSE	76	23.1	6.642857143	-1.43840606	1.205633142	-0.889279932	[-2.231,-0.484)	[ 0.266, 5.061]	[-2.656,-0.455)	0.186	0.462
f	normal weight	34.63287671	TRUE	FALSE	0	0	4	2.37	1.46	36	0.44	4.9	4.7	19.66	0.85	127	84	FALSE	village	FALSE	average	FALSE	FALSE	TRUE	9	FALSE	68	21.3	24.85714286	0.169737596	1.418508934	1.801613243	[-0.484, 0.387)	[ 0.266, 5.061]	[ 0.275, 5.091]	0.696	0.426
m	normal weight	24.49315068	TRUE	FALSE	1	0	3.9	2.45	1.11	28	0.79	4.9	4.6	20.38156971	0.779069767	142	88	TRUE	city_over_100	TRUE	average	FALSE	FALSE	FALSE	9	FALSE	67	22.4	22.07142857	0.299221425	0.339946939	1.817269793	[-0.484, 0.387)	[ 0.266, 5.061]	[ 0.275, 5.091]	0.618	0.448
m	obese	31.09589041	TRUE	TRUE	3	1	5.62	3.65	1.2	21	2.14	4.9	5	34.91596779	1.074074074	134	93	FALSE	village	FALSE	average	FALSE	TRUE	FALSE	13	TRUE	116	5.8	22.85714286	1.507405744	-0.62083035	-0.712608076	[ 0.387, 3.526]	[-2.114,-0.505)	[-2.656,-0.455)	0.64	0.116
f	normal weight	31.66027397	FALSE	FALSE	1	0	4.38	2.62	1.18	27	1.11	5.1	4.7	21.19	0.825581395	107	67	FALSE	city_over_100	TRUE	average	FALSE	FALSE	TRUE	12	FALSE	71	32.4	14.14285714	-1.263344691	1.421097012	0.393841208	[-2.231,-0.484)	[ 0.266, 5.061]	[ 0.275, 5.091]	0.396	0.648
f	normal weight	30.1890411	TRUE	FALSE	1	0	4.22	2.05	1.87	44	0.46	5	4.8	19.06771066	0.732954545	119	91	FALSE	city_20_100	TRUE	average	FALSE	FALSE	TRUE	8	FALSE	64.5	19.4	11.35714286	-1.350097243	-1.56176675	-0.764746285	[-2.231,-0.484)	[-2.114,-0.505)	[-2.656,-0.455)	0.318	0.388
m	obese	33.77534247	TRUE	FALSE	3	1	6.61	4.87	1.18	18	1.09	5.9	5.3	31.31456612	0.961904762	126	86	TRUE	village	FALSE	average	FALSE	FALSE	FALSE	6	FALSE	101	9.1	12.28571429	-1.150136122	-1.634820828	-0.222598331	[-2.231,-0.484)	[-2.114,-0.505)	[-0.455, 0.275)	0.344	0.182
m	overweight	33.51232877	TRUE	FALSE	2	1	5.57	4.08	0.98	18	1.23	4.8	4.9	29.42507922	0.98	116	62	TRUE	city_over_100	TRUE	average	FALSE	FALSE	FALSE	12	FALSE	98	17	13.28571429	-0.248870668	1.112221936	-1.337731768	[-0.484, 0.387)	[ 0.266, 5.061]	[-2.656,-0.455)	0.372	0.34
f	normal weight	24.0630137	TRUE	TRUE	0	0	4.99	2.58	2.15	43	0.45	5	5.5	20.5078125	0.764044944	114.826	71.913	FALSE	city_below_20	FALSE	average	FALSE	FALSE	TRUE	14	FALSE	68	22.4	11.14285714	-1.084561544	-0.8625843	-0.243588938	[-2.231,-0.484)	[-2.114,-0.505)	[-0.455, 0.275)	0.312	0.448
m	normal weight	27.33424658	TRUE	FALSE	1	0	5.45	3.56	1.66	30	1.11	5.2	5	24.91531592	0.894230769	122	79	TRUE	city_over_100	TRUE	average	FALSE	TRUE	FALSE	10	FALSE	93	8.4	10.28571429	-0.855283795	-0.691893251	-0.861066094	[-2.231,-0.484)	[-2.114,-0.505)	[-2.656,-0.455)	0.288	0.168
m	normal weight	22.12328767	TRUE	TRUE	0	0	4.91	2.67	2.1	43	0.58	4.9	5.1	23.22162451	0.778350515	115	60	FALSE	city_below_20	FALSE	average	FALSE	FALSE	FALSE	13	FALSE	75.5	19.1	6.357142857	-1.722380551	-0.454365352	-0.491881995	[-2.231,-0.484)	[-0.505, 0.266)	[-2.656,-0.455)	0.178	0.382
f	obese	23.66849315	TRUE	TRUE	2	1	3.31	1.95	1.18	36	0.6	5.1	5.3	31.55365915	0.741666667	136	79	FALSE	village	FALSE	average	FALSE	FALSE	TRUE	8	TRUE	89	14.9	18.78571429	-0.183124849	-0.276606934	0.241238041	[-0.484, 0.387)	[-0.505, 0.266)	[-0.455, 0.275)	0.526	0.298
m	overweight	33.29315068	TRUE	FALSE	3	1	6.04	4.18	1.09	18	2.11	5.9	5.5	28.73192149	1	92	50	FALSE	city_20_100	TRUE	above_average	TRUE	TRUE	TRUE	11	FALSE	100	46.7	25.35714286	-0.218784725	-0.554753359	0.788419433	[-0.484, 0.387)	[-2.114,-0.505)	[ 0.275, 5.091]	0.71	0.934
m	overweight	35.03835616	TRUE	TRUE	0	0	5.04	3.11	1.53	30	1.41	5.5	5.3	27.16644791	0.86407767	121.64	72.891	FALSE	city_20_100	TRUE	average	FALSE	FALSE	FALSE	10	FALSE	89	16.6	20.78571429	1.179931481	0.406818297	1.446587803	[ 0.387, 3.526]	[ 0.266, 5.061]	[ 0.275, 5.091]	0.582	0.332
m	overweight	26.36164384	TRUE	FALSE	0	0	4.3	2.23	1.72	40	1.04	5.1	4.7	27.27918388	0.970588235	119.857	74.889	FALSE	city_below_20	FALSE	above_average	TRUE	FALSE	TRUE	10	FALSE	99	13.5	11.14285714	-0.624098384	-1.183114914	1.631405608	[-2.231,-0.484)	[-2.114,-0.505)	[ 0.275, 5.091]	0.312	0.27
f	normal weight	32.66575342	TRUE	FALSE	0	0	4.02	2.01	1.7	42	0.61	5.1	5	21.79944511	0.844444444	114.51425	74.08090476	FALSE	city_20_100	TRUE	average	FALSE	FALSE	TRUE	10	FALSE	76	21.7	13.85714286	-0.720242028	-0.794849116	-0.400923631	[-2.231,-0.484)	[-2.114,-0.505)	[-0.455, 0.275)	0.388	0.434
m	normal weight	31.23561644	TRUE	FALSE	0	0	4.33	2.51	1.64	38	0.97	5.4	5.5	23.1419272	0.811111111	119.583	74.478	TRUE	village	FALSE	average	FALSE	FALSE	TRUE	8	FALSE	73	15.6	16.92857143	0.755496941	0.666631068	-1.004567474	[ 0.387, 3.526]	[ 0.266, 5.061]	[-2.656,-0.455)	0.474	0.312
m	overweight	21.68767123	TRUE	FALSE	0	0	3.73	1.66	1.97	53	0.35	4.6	4.9	25.2493372	0.888888889	122.272	73.934	FALSE	city_below_20	FALSE	average	FALSE	FALSE	FALSE	14	FALSE	80	14.5	26.21428571	-0.194220302	-0.107452514	-0.916761403	[-0.484, 0.387)	[-0.505, 0.266)	[-2.656,-0.455)	0.734	0.29
m	normal weight	35.93972603	TRUE	FALSE	3	1	7.2	5.3	1.09	15	1.96	6	5.6	23.12467037	0.836956522	134.256	82.598	TRUE	city_below_20	FALSE	average	FALSE	FALSE	FALSE	7	FALSE	77	8.2	19.57142857	1.813688572	-0.16251787	0.129765142	[ 0.387, 3.526]	[-0.505, 0.266)	[-0.455, 0.275)	0.548	0.164
m	overweight	25.62191781	FALSE	FALSE	0	0	3.78	2.23	1.29	34	0.83	5.4	5.1	25.68007405	0.833333333	124	78	FALSE	city_over_100	TRUE	average	FALSE	TRUE	FALSE	12.252	FALSE	90	21.44318333	15.35342857	-0.321485757	0.321823363	-1.171876131	[-0.484, 0.387)	[ 0.266, 5.061]	[-2.656,-0.455)	0.432197333	0.434666
m	normal weight	28.96164384	TRUE	FALSE	1	0	4.9	3.06	1.66	34	1.06	5.1	4.8	24.81096408	0.932692308	130	88	FALSE	city_20_100	TRUE	average	FALSE	FALSE	TRUE	11	FALSE	97	18.1	17.92857143	0.113296215	0.531614675	-0.300349787	[-0.484, 0.387)	[ 0.266, 5.061]	[-0.455, 0.275)	0.502	0.362
m	overweight	32.5890411	TRUE	TRUE	1	0	4.97	3.27	1.3	26	1.34	5.6	5	26.57589059	0.911214953	120	70	FALSE	city_over_100	TRUE	above_average	TRUE	FALSE	TRUE	10	FALSE	97.5	14.8	27.71428571	2.126789643	0.491405346	-0.461135679	[ 0.387, 3.526]	[ 0.266, 5.061]	[-2.656,-0.455)	0.776	0.296
f	normal weight	28.96438356	TRUE	FALSE	0	0	4.49	2.98	1.41	31	0.84	4.9	4.9	23.28577091	0.79	118.27225	74.604	FALSE	city_20_100	TRUE	average	FALSE	FALSE	TRUE	13	FALSE	79	36.7	7.214285714	-1.336407257	0.732968217	-0.44596287	[-2.231,-0.484)	[ 0.266, 5.061]	[-0.455, 0.275)	0.202	0.734
f	normal weight	33.28219178	TRUE	FALSE	0	0	4.71	3.15	1.4	30	0.82	5.2	5.2	17.27	0.774725275	112.944	71.709	FALSE	city_over_100	TRUE	average	FALSE	FALSE	TRUE	11	FALSE	70.5	19.3	15.71428571	0.390270241	-0.273905612	-0.033824377	[ 0.387, 3.526]	[-0.505, 0.266)	[-0.455, 0.275)	0.44	0.386
f	normal weight	20.21917808	TRUE	FALSE	0	0	4.12	2.72	1.3	32	0.63	4.5	5.2	18.12523512	0.677419355	117.0303333	71.723	FALSE	city_over_100	TRUE	above_average	TRUE	FALSE	FALSE	13	FALSE	63	3.9	5.642857143	-1.112134795	-1.588477328	-0.565560306	[-2.231,-0.484)	[-2.114,-0.505)	[-2.656,-0.455)	0.158	0.078
m	overweight	22.37260274	FALSE	FALSE	0	0	4.4	2.54	1.84	42	0.35	5.4	4.8	28.73	0.775700935	122.383	75.807	FALSE	village	FALSE	above_average	TRUE	FALSE	FALSE	10	FALSE	83	21.9	26.28571429	-0.070990441	0.047394475	-1.407652146	[-0.484, 0.387)	[-0.505, 0.266)	[-2.656,-0.455)	0.736	0.438
f	normal weight	30.43835616	TRUE	FALSE	0	0	3.94	2.25	1.41	36	1.04	4.8	4.7	21.484375	0.741935484	115.929	73.623	FALSE	city_over_100	TRUE	average	FALSE	FALSE	TRUE	10	FALSE	69	19.1	10.35714286	-0.851252573	-0.592853991	-0.333367926	[-2.231,-0.484)	[-2.114,-0.505)	[-0.455, 0.275)	0.29	0.382
m	normal weight	24.42465753	TRUE	FALSE	0	0	3.72	2.29	1.21	33	0.7	4.3	4.8	23.51557907	0.836538462	121.914	73.464	FALSE	city_over_100	TRUE	average	FALSE	FALSE	FALSE	9	FALSE	87	5.4	16.92857143	0.334243505	-1.064661231	0.575916118	[-0.484, 0.387)	[-2.114,-0.505)	[ 0.275, 5.091]	0.474	0.108
f	normal weight	27.37260274	TRUE	FALSE	0	0	4.75	2.63	2.07	44	0.51	4.9	5.2	19.03810742	0.708333333	116.635	73.595	FALSE	city_over_100	TRUE	above_average	TRUE	FALSE	TRUE	19	FALSE	68	19.1	24.57142857	1.48431409	0.136388268	-0.779866801	[ 0.387, 3.526]	[-0.505, 0.266)	[-2.656,-0.455)	0.688	0.382
f	normal weight	35.44383562	TRUE	FALSE	0	0	4.71	2.86	1.8	38	0.7	5.1	5.2	23.59700421	0.696078431	112.803	74.31633333	FALSE	city_over_100	TRUE	average	FALSE	FALSE	FALSE	7	FALSE	71	21.4	14.5	-0.59599113	0.7054782	0.737895277	[-2.231,-0.484)	[ 0.266, 5.061]	[ 0.275, 5.091]	0.406	0.428
m	normal weight	27.99726027	TRUE	FALSE	0	0	4.58	3.06	1.37	30	0.78	4.8	5.3	24.41827061	0.818181818	119.758	74.567	FALSE	city_over_100	TRUE	average	FALSE	FALSE	TRUE	12	FALSE	81	15.9	10.57142857	0.015739066	-0.242171589	-0.341526022	[-0.484, 0.387)	[-0.505, 0.266)	[-0.455, 0.275)	0.296	0.318
f	overweight	28.15616438	TRUE	FALSE	0	0	4.95	2.79	2.01	41	0.76	5.2	4.9	25.97011555	0.82	119	78	FALSE	city_20_100	TRUE	average	FALSE	FALSE	TRUE	11	FALSE	82	19.8	9.785714286	-0.054052792	0.063078919	-0.612049989	[-0.484, 0.387)	[-0.505, 0.266)	[-2.656,-0.455)	0.274	0.396
m	overweight	32.2739726	TRUE	TRUE	0	0	4.24	2.46	1.49	35	0.98	5.2	4.9	25.60553633	0.873684211	120.12	74.3968	FALSE	village	FALSE	average	FALSE	FALSE	FALSE	11	FALSE	83	39.1	1.357142857	-0.867141961	2.512721143	-2.334554039	[-2.231,-0.484)	[ 0.266, 5.061]	[-2.656,-0.455)	0.038	0.782
m	normal weight	22.63287671	TRUE	FALSE	0	0	3.69	2.14	1.48	40	0.67	4.4	5.1	21.22000905	0.89	122.956	72.463	FALSE	city_20_100	TRUE	average	FALSE	TRUE	TRUE	13	FALSE	89	50	43.35714286	1.18436853	1.243984459	2.128026414	[ 0.387, 3.526]	[ 0.266, 5.061]	[ 0.275, 5.091]	1.214	1
m	obese	22.15890411	TRUE	FALSE	2	1	5.46	3.71	1.51	28	1.24	5.5	4.8	30.06127876	0.931034483	128	86	TRUE	city_over_100	TRUE	average	FALSE	FALSE	FALSE	8	TRUE	108	16.6	19.5	1.753235747	0.164008758	0.031980985	[ 0.387, 3.526]	[-0.505, 0.266)	[-0.455, 0.275)	0.546	0.332
f	normal weight	34.5260274	TRUE	FALSE	1	0	4.8	3.08	1.62	34	0.79	4.8	5.1	19.36247266	0.833333333	131	88	FALSE	city_over_100	TRUE	above_average	TRUE	TRUE	TRUE	10	FALSE	80	31.6	29.42857143	1.142151976	0.145524935	1.49128544	[ 0.387, 3.526]	[-0.505, 0.266)	[ 0.275, 5.091]	0.824	0.632
m	normal weight	21.29863014	TRUE	FALSE	0	0	3.57	2.1	1.22	34	0.6	4.8	4.8	24.41827061	0.87628866	123	81	FALSE	city_over_100	TRUE	above_average	TRUE	FALSE	FALSE	13	FALSE	85	30.6	16.07142857	0.098357508	-0.411583831	-0.046452987	[-0.484, 0.387)	[-0.505, 0.266)	[-0.455, 0.275)	0.45	0.612
f	normal weight	34.44383562	TRUE	TRUE	0	0	4.87	3.17	1.61	33	0.38	5	5	22.14532872	0.757281553	116	68	FALSE	city_20_100	TRUE	average	FALSE	FALSE	TRUE	11	FALSE	78	29.8	26.21428571	-0.135480113	-0.38268774	0.368489267	[-0.484, 0.387)	[-0.505, 0.266)	[ 0.275, 5.091]	0.734	0.596
f	obese	28.64931507	TRUE	TRUE	3	1	6.47	4.67	1.46	23	1.81	5.8	5.5	37.46556474	0.746031746	130	83	FALSE	city_20_100	TRUE	average	FALSE	FALSE	FALSE	8	TRUE	94	12.6	3	-1.864985543	-0.857374045	-0.66094482	[-2.231,-0.484)	[-2.114,-0.505)	[-2.656,-0.455)	0.084	0.252
m	overweight	30.46849315	TRUE	FALSE	0	0	4.47	2.98	1.36	30	0.82	5.1	5	27.46530314	0.857142857	123	77	FALSE	city_20_100	TRUE	average	FALSE	FALSE	TRUE	8	FALSE	96	32.8	5.714285714	-1.222238162	1.156146908	-0.240463534	[-2.231,-0.484)	[ 0.266, 5.061]	[-0.455, 0.275)	0.16	0.656
m	overweight	32.13150685	TRUE	FALSE	2	1	4.27	3.02	0.91	21	1.48	5.4	5.1	29.2184076	0.904347826	170	115	FALSE	city_over_100	TRUE	above_average	TRUE	TRUE	TRUE	10	TRUE	104	35.9	19.5	0.515614822	2.492460871	1.009052161	[ 0.387, 3.526]	[ 0.266, 5.061]	[ 0.275, 5.091]	0.546	0.718
f	normal weight	32.34794521	TRUE	FALSE	0	0	5.37	3.04	2.23	42	0.44	4.8	5.1	19.38214469	0.738636364	122	82	FALSE	city_over_100	TRUE	below_average	FALSE	FALSE	TRUE	13	FALSE	65	17.3	0.928571429	-2.231046374	0.123767348	-0.093097378	[-2.231,-0.484)	[-0.505, 0.266)	[-0.455, 0.275)	0.026	0.346
m	obese	27.7890411	TRUE	FALSE	2	1	5.4	3.52	1.08	20	2.76	5.2	4.8	32.05030371	1	128	79	TRUE	city_over_100	TRUE	average	FALSE	TRUE	FALSE	18	TRUE	105	10.8	19.5	1.096225478	-0.464945853	-1.360047608	[ 0.387, 3.526]	[-0.505, 0.266)	[-2.656,-0.455)	0.546	0.216
f	normal weight	21.00821918	TRUE	FALSE	0	0	4.56	2.54	1.85	41	0.84	4.8	4.5	22.94213045	0.873563218	105	70	FALSE	city_over_100	TRUE	average	FALSE	FALSE	FALSE	11	FALSE	76	20.2	11.85714286	-0.607465164	0.604207514	0.362792294	[-2.231,-0.484)	[ 0.266, 5.061]	[ 0.275, 5.091]	0.332	0.404
m	normal weight	31.84657534	TRUE	FALSE	3	1	6.56	4.81	1.31	20	1.84	5.5	4.9	24.53512397	0.773809524	130	85	FALSE	city_over_100	TRUE	average	FALSE	FALSE	FALSE	8	FALSE	65	15.2	18.5	1.736879932	0.366580208	1.39702028	[ 0.387, 3.526]	[ 0.266, 5.061]	[ 0.275, 5.091]	0.518	0.304
f	normal weight	29.61369863	TRUE	TRUE	0	0	4.28	2.18	1.95	46	0.75	5.2	4.6	21.93634741	0.782608696	113	81	FALSE	city_over_100	TRUE	average	FALSE	FALSE	TRUE	16	FALSE	72	22	4	-1.544628725	0.226626557	-0.604236263	[-2.231,-0.484)	[-0.505, 0.266)	[-2.656,-0.455)	0.112	0.44
m	normal weight	27.65753425	TRUE	FALSE	0	0	3.6	1.68	1.83	51	0.49	5.1	5.2	23.78121284	0.833333333	118	67	FALSE	city_20_100	TRUE	above_average	TRUE	FALSE	FALSE	7	FALSE	80	46.4	12.07142857	0.383186337	1.032182572	0.589994086	[-0.484, 0.387)	[ 0.266, 5.061]	[ 0.275, 5.091]	0.338	0.928
f	overweight	27.20547945	TRUE	FALSE	1	0	3.6	1.49	2.01	56	0.67	5.4	5	25.2493372	0.769911504	136	93	FALSE	city_20_100	TRUE	average	FALSE	FALSE	TRUE	12	FALSE	87	24.5	15.64285714	-0.218807426	0.368920924	0.899250097	[-0.484, 0.387)	[ 0.266, 5.061]	[ 0.275, 5.091]	0.438	0.49
f	normal weight	32.55616438	TRUE	TRUE	0	0	4.7	2.58	2.06	44	0.69	4.5	4.8	18.5438872	0.733695652	121	70	FALSE	city_over_100	TRUE	average	FALSE	FALSE	TRUE	12	FALSE	67.5	13.4	11.5	-0.661012704	-0.376234	-1.052546775	[-2.231,-0.484)	[-0.505, 0.266)	[-2.656,-0.455)	0.322	0.268
m	normal weight	34.28219178	TRUE	FALSE	1	0	3.95	2.22	1.63	41	0.54	5.6	5.2	21.77755334	0.808080808	120	80	FALSE	city_below_20	FALSE	average	FALSE	FALSE	FALSE	9	FALSE	80	7.6	19.5	1.082312304	-1.0881323	-1.177803173	[ 0.387, 3.526]	[-2.114,-0.505)	[-2.656,-0.455)	0.546	0.152
f	normal weight	26.41369863	FALSE	FALSE	0	0	3.85	1.85	1.94	50	0.58	4.8	4.8	20.8	0.640776699	120	71	FALSE	city_over_100	TRUE	above_average	TRUE	FALSE	TRUE	10	FALSE	66	9.7	22.28571429	0.54787304	-0.300324171	-0.295007707	[ 0.387, 3.526]	[-0.505, 0.266)	[-0.455, 0.275)	0.624	0.194
f	obese	24.8630137	TRUE	FALSE	3	1	5.38	3.6	0.81	15	3.79	5.8	5.2	36.50621958	0.893442623	126	72	FALSE	city_over_100	TRUE	average	FALSE	TRUE	FALSE	5	TRUE	109	24.1	27.71428571	1.173770532	1.351226735	2.920039725	[ 0.387, 3.526]	[ 0.266, 5.061]	[ 0.275, 5.091]	0.776	0.482
f	obese	34.69589041	TRUE	TRUE	4	1	6.3	4.76	1.12	18	2.17	6.1	5.3	33.7523196	0.864	120	89	FALSE	city_20_100	TRUE	average	FALSE	TRUE	FALSE	11	TRUE	108	21.3	12.35714286	-0.764783983	-1.612164981	-0.327090466	[-2.231,-0.484)	[-2.114,-0.505)	[-0.455, 0.275)	0.346	0.426
m	obese	24.90136986	TRUE	FALSE	3	1	5.22	3.57	1.03	20	2.71	4.9	5.1	33.95918367	1.009259259	123	82	FALSE	city_over_100	TRUE	average	FALSE	TRUE	FALSE	7	TRUE	109	29.6	23.85714286	1.470897147	0.153563629	0.332308975	[ 0.387, 3.526]	[-0.505, 0.266)	[ 0.275, 5.091]	0.668	0.592
m	normal weight	28.70136986	TRUE	TRUE	2	1	6.18	4.43	1.07	17	2.39	4.9	5.1	24.44727891	0.934065934	119	80	FALSE	city_over_100	TRUE	average	FALSE	FALSE	TRUE	13	FALSE	85	23.8	19.71428571	0.098018143	1.149142717	0.723634242	[-0.484, 0.387)	[ 0.266, 5.061]	[ 0.275, 5.091]	0.552	0.476
f	normal weight	23.5369863	TRUE	TRUE	0	0	4.82	2.6	2.03	42	0.71	4.6	4.2	20.43816558	0.8875	108	67	FALSE	city_over_100	TRUE	average	FALSE	FALSE	TRUE	5	FALSE	71	34.2	9.928571429	-0.270855945	1.355520677	-0.563973637	[-0.484, 0.387)	[ 0.266, 5.061]	[-2.656,-0.455)	0.278	0.684
f	overweight	26.14520548	TRUE	FALSE	1	0	3.42	1.37	1.86	54	0.57	5.2	4.5	28.9340689	0.923809524	135	69	TRUE	city_over_100	TRUE	average	FALSE	TRUE	FALSE	4	TRUE	97	9.7	23.5	0.18774313	-1.168557431	-1.00881618	[-0.484, 0.387)	[-2.114,-0.505)	[-2.656,-0.455)	0.658	0.194
m	overweight	34.32328767	TRUE	FALSE	3	1	4.96	3.35	1.14	23	1.74	5.7	4.9	29.68495643	1.029411765	130	81	FALSE	village	FALSE	average	FALSE	TRUE	FALSE	9	TRUE	105	9.1	24.28571429	0.829779008	-1.043873451	-0.401894973	[ 0.387, 3.526]	[-2.114,-0.505)	[-0.455, 0.275)	0.68	0.182
m	normal weight	30.01369863	TRUE	FALSE	2	1	5.05	3.04	1.17	23	3.17	5.5	5.2	24.21229339	0.93814433	153	97	TRUE	city_below_20	FALSE	average	FALSE	TRUE	FALSE	11	FALSE	91	10.1	22.57142857	1.165059799	-0.130354881	0.663695819	[ 0.387, 3.526]	[-0.505, 0.266)	[ 0.275, 5.091]	0.632	0.202
f	normal weight	24.79178082	TRUE	TRUE	1	0	4.15	1.96	1.97	47	1.16	5.2	5.1	19.70553242	0.7625	120	86	FALSE	city_over_100	TRUE	average	FALSE	FALSE	TRUE	13	FALSE	61	26.7	26.21428571	0.894488777	0.580173207	0.210178609	[ 0.387, 3.526]	[ 0.266, 5.061]	[-0.455, 0.275)	0.734	0.534
f	normal weight	19.68493151	TRUE	FALSE	1	0	4.02	2.31	1.53	38	0.36	4.6	4.5	18.46722068	0.825581395	135	85	FALSE	city_over_100	TRUE	average	FALSE	TRUE	FALSE	7	FALSE	71	12.2	8	-0.781694349	-0.76069261	-0.340348921	[-2.231,-0.484)	[-2.114,-0.505)	[-0.455, 0.275)	0.224	0.244
m	obese	31.3890411	TRUE	FALSE	2	1	4.66	3.24	1.14	24	1.06	5.6	5.1	30.11940191	0.948453608	135	76	FALSE	city_over_100	TRUE	average	FALSE	FALSE	FALSE	9	FALSE	92	22	5	-1.276155273	0.360122573	0.191186162	[-2.231,-0.484)	[ 0.266, 5.061]	[-0.455, 0.275)	0.14	0.44
f	overweight	26.44657534	TRUE	FALSE	0	0	4.18	2.07	1.82	44	0.92	4.7	4.7	25.86451247	0.878787879	118	61	TRUE	city_20_100	TRUE	average	FALSE	FALSE	TRUE	13	FALSE	87	24.5	10.28571429	-0.862597671	-0.404491518	-0.149401419	[-2.231,-0.484)	[-0.505, 0.266)	[-0.455, 0.275)	0.288	0.49
f	obese	28.76712329	TRUE	FALSE	2	1	5.08	3.34	1.26	25	0.89	5.4	5.1	34.25044224	0.913043478	134	87	FALSE	city_over_100	TRUE	average	FALSE	FALSE	FALSE	11	TRUE	105	46	3.428571429	-0.523990602	3.341448369	-0.171965271	[-2.231,-0.484)	[ 0.266, 5.061]	[-0.455, 0.275)	0.096	0.92
m	overweight	21.8739726	TRUE	FALSE	1	0	4.23	2.52	1.31	31	1.33	5.1	5.1	27.46530314	0.923076923	130	80	FALSE	city_over_100	TRUE	above_average	TRUE	FALSE	TRUE	16	FALSE	96	13.7	11.35714286	0.114437917	-0.520174224	-0.257808318	[-0.484, 0.387)	[-2.114,-0.505)	[-0.455, 0.275)	0.318	0.274
f	normal weight	21.92876712	TRUE	FALSE	2	1	5.82	2.95	2.44	42	1.99	5.4	4.6	20.76	0.885057471	137	72	TRUE	city_20_100	TRUE	above_average	TRUE	FALSE	TRUE	0	FALSE	77	21.3	27.71428571	1.208816214	-0.347031635	0.650325302	[ 0.387, 3.526]	[-0.505, 0.266)	[ 0.275, 5.091]	0.776	0.426
f	overweight	23.19452055	TRUE	FALSE	1	0	4.8	2.6	1.97	41	0.92	5.6	4.9	26.57312925	0.831775701	110	71	TRUE	village	FALSE	average	FALSE	FALSE	FALSE	15	TRUE	89	13.4	14.14285714	-0.293533526	-0.898784069	-0.578220943	[-0.484, 0.387)	[-2.114,-0.505)	[-2.656,-0.455)	0.396	0.268
f	obese	30.7260274	TRUE	FALSE	0	0	3.97	1.99	1.72	43	0.86	5.1	4.6	30.82482993	0.877358491	129	68	TRUE	city_20_100	TRUE	below_average	FALSE	TRUE	FALSE	8	TRUE	93	9.5	23.5	0.948303915	-0.12463164	-0.327505962	[ 0.387, 3.526]	[-0.505, 0.266)	[-0.455, 0.275)	0.658	0.19
f	normal weight	32.30136986	TRUE	TRUE	0	0	4.37	2.31	1.86	43	0.76	5.2	5.4	23.18	0.742268041	119	82	FALSE	city_over_100	TRUE	average	FALSE	FALSE	TRUE	12	FALSE	72	20.9	13.57142857	-0.349304948	-0.343796325	1.603651304	[-0.484, 0.387)	[-0.505, 0.266)	[ 0.275, 5.091]	0.38	0.418
m	normal weight	23.62191781	FALSE	FALSE	0	0	3.69	2.1	1.33	41	0.42	4.8	4.7	24.57	0.806122449	109	70	FALSE	city_over_100	TRUE	above_average	TRUE	FALSE	FALSE	11	FALSE	79	29.4	16.71428571	-0.893575878	0.211311229	-0.775332855	[-2.231,-0.484)	[-0.505, 0.266)	[-2.656,-0.455)	0.468	0.588
f	normal weight	27.43287671	TRUE	TRUE	1	0	4.1	2.22	1.78	43	0.41	5.3	4.4	20.19509221	0.837209302	130	79	FALSE	city_over_100	TRUE	average	FALSE	FALSE	FALSE	10	FALSE	72	11.8	13.85714286	-0.82893286	-1.09598404	-0.852544879	[-2.231,-0.484)	[-2.114,-0.505)	[-2.656,-0.455)	0.388	0.236
m	overweight	30.40821918	TRUE	FALSE	1	0	5.09	3.54	1.22	24	1.18	5.3	4.6	26.84635829	0.886792453	140	87	FALSE	city_below_20	FALSE	above_average	TRUE	FALSE	TRUE	10	FALSE	94	14.1	29.78571429	0.264608545	-1.029773116	-0.359880599	[-0.484, 0.387)	[-2.114,-0.505)	[-0.455, 0.275)	0.834	0.282
f	normal weight	24.7260274	TRUE	FALSE	2	1	5.15	2.9	2.02	39	0.55	5.8	4.9	19.83471074	0.848837209	120	90	FALSE	village	FALSE	average	FALSE	FALSE	TRUE	10	FALSE	73	38.8	16.5	-0.47820791	0.640777632	0.76196885	[-0.484, 0.387)	[ 0.266, 5.061]	[ 0.275, 5.091]	0.462	0.776
m	normal weight	31.34794521	TRUE	FALSE	2	1	4.27	2.71	1.32	31	0.65	5.6	5	24.09972299	0.823529412	140	80	FALSE	city_below_20	FALSE	above_average	TRUE	FALSE	TRUE	7	FALSE	84	23.8	32	0.972429615	1.136331639	1.809398156	[ 0.387, 3.526]	[ 0.266, 5.061]	[ 0.275, 5.091]	0.896	0.476
m	normal weight	26.26027397	TRUE	FALSE	1	0	3.65	2.14	1.31	36	0.66	5.2	5.1	20.83081753	0.808080808	143	88	FALSE	city_over_100	TRUE	average	FALSE	FALSE	FALSE	9	FALSE	80	16	21.07142857	0.779386728	-0.228039054	-0.810991065	[ 0.387, 3.526]	[-0.505, 0.266)	[-2.656,-0.455)	0.59	0.32
m	overweight	30.28219178	TRUE	TRUE	0	0	4.85	3.26	1.42	29	1.25	4.9	4.9	28.06	0.95049505	120	66	TRUE	city_20_100	TRUE	average	FALSE	TRUE	FALSE	16	FALSE	96	14.8	26.5	1.369833537	0.775907897	0.237010395	[ 0.387, 3.526]	[ 0.266, 5.061]	[-0.455, 0.275)	0.742	0.296
m	normal weight	24.35890411	TRUE	FALSE	2	1	6.34	3.75	2.52	40	0.81	4.7	5.2	23.03875236	0.79	135	86	FALSE	village	FALSE	average	FALSE	FALSE	TRUE	7	FALSE	79	6.5	17.07142857	0.229272578	-0.525485744	-0.600173462	[-0.484, 0.387)	[-2.114,-0.505)	[-2.656,-0.455)	0.478	0.13
m	obese	32.44383562	TRUE	FALSE	5	1	6.93	2.86	0.68	10	12.34	6.6	5	37.55102041	1.025862069	160	80	FALSE	city_below_20	FALSE	above_average	TRUE	FALSE	TRUE	15	TRUE	119	15.9	30.42857143	1.666328361	0.637848182	-0.973288629	[ 0.387, 3.526]	[ 0.266, 5.061]	[-2.656,-0.455)	0.852	0.318
m	normal weight	31.18630137	TRUE	FALSE	1	0	6.39	4.77	1.18	18	0.64	5.1	5.2	23.77	0.921568627	125	77	TRUE	city_below_20	FALSE	above_average	TRUE	TRUE	TRUE	14	FALSE	94	15	11.07142857	-0.548142576	-1.649078535	-0.240210424	[-2.231,-0.484)	[-2.114,-0.505)	[-0.455, 0.275)	0.31	0.3
m	normal weight	32.99452055	TRUE	TRUE	2	1	5.44	3.05	2.15	40	0.44	5.6	5	21.73650525	0.821782178	122	71	FALSE	city_over_100	TRUE	above_average	TRUE	FALSE	TRUE	14	FALSE	83	47.8	14.28571429	-1.249081051	3.662545467	-0.16752808	[-2.231,-0.484)	[ 0.266, 5.061]	[-0.455, 0.275)	0.4	0.956
f	normal weight	27.87945205	TRUE	FALSE	0	0	4.61	2.53	1.9	41	0.68	4.9	4.8	21.07719523	0.768421053	117	75	FALSE	city_over_100	TRUE	average	FALSE	FALSE	TRUE	12.227	FALSE	73	24.03534	16.08042857	-0.172203439	0.202196036	1.202350379	[-0.484, 0.387)	[-0.505, 0.266)	[ 0.275, 5.091]	0.447887333	0.481514
f	obese	32.60821918	TRUE	FALSE	3	1	4.12	2.61	1.09	26	1.36	5.7	5.1	32.44997296	0.980769231	132	75	FALSE	village	FALSE	average	FALSE	TRUE	TRUE	10	TRUE	102	21.7	23.28571429	0.187824609	1.261964755	0.176035185	[-0.484, 0.387)	[ 0.266, 5.061]	[-0.455, 0.275)	0.652	0.434
m	overweight	34.46027397	TRUE	FALSE	1	0	5.09	3.31	1.46	29	0.84	5.3	4.8	27.76	0.92	132	83	FALSE	village	FALSE	average	FALSE	FALSE	TRUE	8	FALSE	92	25.6	24.64285714	1.408036581	2.131436179	-1.224393105	[ 0.387, 3.526]	[ 0.266, 5.061]	[-2.656,-0.455)	0.69	0.512
f	normal weight	32.35616438	TRUE	FALSE	0	0	4.08	1.92	1.89	46	0.51	5	4.5	19.26717144	0.793576966	115	65	TRUE	city_over_100	TRUE	average	FALSE	FALSE	TRUE	12	FALSE	71.66	27.2	10.85714286	-1.32216463	1.797874546	0.716293418	[-2.231,-0.484)	[ 0.266, 5.061]	[ 0.275, 5.091]	0.304	0.544
m	obese	26.54520548	TRUE	FALSE	1	0	5.66	4.15	1.15	20	1.43	5.3	5.2	30.42184965	0.869158879	120	73	FALSE	village	FALSE	average	FALSE	TRUE	FALSE	12	FALSE	93	14.5	23.5	-0.194655707	-0.912921149	-0.4237389	[-0.484, 0.387)	[-2.114,-0.505)	[-0.455, 0.275)	0.658	0.29
m	overweight	29.05753425	TRUE	FALSE	2	1	5.19	3.68	1.13	22	0.92	5.2	5	29.06592681	0.93814433	145	89	FALSE	city_over_100	TRUE	above_average	TRUE	FALSE	TRUE	12	FALSE	91	7.9	23.07142857	0.217020647	0.175800782	-1.327965939	[-0.484, 0.387)	[-0.505, 0.266)	[-2.656,-0.455)	0.646	0.158
m	normal weight	28.00821918	TRUE	FALSE	0	0	4.24	2.55	1.47	35	1.01	5	4.9	22.41670917	0.911764706	120	68	TRUE	city_over_100	TRUE	average	FALSE	FALSE	TRUE	12	FALSE	93	27.4	13.64285714	-0.83466629	0.203694583	0.713536215	[-2.231,-0.484)	[-0.505, 0.266)	[ 0.275, 5.091]	0.382	0.548
f	normal weight	21.94520548	FALSE	TRUE	0	0	4.16	1.82	2.06	50	1.12	5	4.5	18.99	0.831168831	111	74	TRUE	city_over_100	TRUE	average	FALSE	FALSE	FALSE	13	FALSE	64	21.7	10.78571429	-0.725036905	-0.771831496	0.346286596	[-2.231,-0.484)	[-2.114,-0.505)	[ 0.275, 5.091]	0.302	0.434
m	overweight	27.15342466	TRUE	FALSE	0	0	4.79	3.01	1.62	34	0.62	4.6	5	27.08415907	0.956043956	114	74	FALSE	city_over_100	TRUE	average	FALSE	FALSE	TRUE	8	FALSE	87	12	16.92857143	0.06781372	0.04857638	-1.944532947	[-0.484, 0.387)	[-0.505, 0.266)	[-2.656,-0.455)	0.474	0.24
f	normal weight	28.48767123	FALSE	FALSE	0	0	5.18	3.11	1.84	36	0.72	4.9	4.8	20.55	0.78902402	110	65	FALSE	city_over_100	TRUE	above_average	TRUE	FALSE	TRUE	13	FALSE	70.74104	43.2	6.928571429	-1.053873484	0.489447359	-0.743685296	[-2.231,-0.484)	[ 0.266, 5.061]	[-2.656,-0.455)	0.194	0.864
f	normal weight	25.34794521	FALSE	FALSE	2	1	3.85	2.72	0.92	24	0.59	4.8	5.1	23.7	0.79	160	85	FALSE	city_over_100	TRUE	average	FALSE	FALSE	FALSE	9	FALSE	79	36	17.28571429	-0.437442447	1.266488592	-0.624437424	[-0.484, 0.387)	[ 0.266, 5.061]	[-2.656,-0.455)	0.484	0.72
f	normal weight	23.5369863	FALSE	FALSE	0	0	5.28	2.17	3.04	58	0.57	4.6	4.9	19.69	0.673469388	116	73	FALSE	village	FALSE	average	FALSE	FALSE	TRUE	9	FALSE	66	31	9.214285714	-1.610865805	0.046090934	0.784087062	[-2.231,-0.484)	[-0.505, 0.266)	[ 0.275, 5.091]	0.258	0.62
f	normal weight	31.15616438	TRUE	FALSE	1	0	4.38	2.09	2.15	49	0.53	4.6	4.3	22.23	1.079365079	114	88	FALSE	city_over_100	TRUE	average	FALSE	TRUE	TRUE	9	FALSE	68	10.8	4	-1.391938867	0.234065184	-0.879977005	[-2.231,-0.484)	[-0.505, 0.266)	[-2.656,-0.455)	0.112	0.216
f	normal weight	33.6109589	FALSE	FALSE	0	0	4.27	2.47	1.76	41	0.59	4.7	4.8	21.05	0.882352941	106	64	FALSE	city_over_100	TRUE	average	FALSE	FALSE	TRUE	13	FALSE	75	23.5	0.714285714	-2.05769581	0.036604743	-0.765215748	[-2.231,-0.484)	[-0.505, 0.266)	[-2.656,-0.455)	0.02	0.47
f	normal weight	25.75616438	FALSE	FALSE	0	0	6.26	3.72	2.35	38	0.57	4.6	4.9	18.47	0.802469136	118	65	FALSE	city_20_100	TRUE	above_average	TRUE	FALSE	TRUE	10	FALSE	65	17.3	24.78571429	0.167778185	-1.161362993	0.76683993	[-0.484, 0.387)	[-2.114,-0.505)	[ 0.275, 5.091]	0.694	0.346
f	overweight	35.1260274	TRUE	FALSE	1	0	6.12	4.36	1.43	23	0.84	4.9	4.8	27.31	0.96	139	72	FALSE	village	FALSE	average	FALSE	FALSE	TRUE	9	TRUE	96	47.8	14.57142857	0.386630754	1.476700044	-1.014236564	[ 0.387, 3.526]	[ 0.266, 5.061]	[-2.656,-0.455)	0.408	0.956
m	normal weight	31.76712329	FALSE	FALSE	1	0	4.63	2.45	2.09	45	0.6	4.7	4.6	21.97	0.81144734	130	75	FALSE	city_over_100	TRUE	above_average	TRUE	FALSE	TRUE	11	FALSE	77.81966	29.6	14.14285714	-0.399032323	0.624783282	0.151418609	[-0.484, 0.387)	[ 0.266, 5.061]	[-0.455, 0.275)	0.396	0.592
m	normal weight	23.99726027	TRUE	FALSE	0	0	3.26	2.19	1.05	32	0.72	4.1	5.2	21.67125803	0.871287129	120	65	TRUE	city_20_100	TRUE	average	FALSE	FALSE	FALSE	9	FALSE	88	16.9	31.78571429	2.332100685	0.058008829	0.865778368	[ 0.387, 3.526]	[-0.505, 0.266)	[ 0.275, 5.091]	0.89	0.338
m	overweight	34.72328767	TRUE	FALSE	0	0	4.48	3.03	1.22	27	1.08	4.9	4.9	26.70362358	0.943820225	114	71	TRUE	city_over_100	TRUE	average	FALSE	FALSE	FALSE	14	FALSE	84	25.2	19.42857143	-0.646388616	0.020958803	1.235936879	[-2.231,-0.484)	[-0.505, 0.266)	[ 0.275, 5.091]	0.544	0.504
f	normal weight	27.58356164	FALSE	FALSE	2	1	8.49	5.48	2.31	27	2.23	4.3	5.2	22.15	0.771084337	140	90	FALSE	city_over_100	TRUE	above_average	TRUE	TRUE	TRUE	14	FALSE	64	9.8	10.5	-0.529895887	-0.888086503	-1.216650965	[-2.231,-0.484)	[-2.114,-0.505)	[-2.656,-0.455)	0.294	0.196
m	normal weight	26.88767123	FALSE	FALSE	2	1	5.61	3.96	1.19	21	0.78	5.1	5.4	22.44	0.893203883	130	80	TRUE	city_over_100	TRUE	average	FALSE	FALSE	TRUE	16	FALSE	92	23.4	17.35714286	0.961407111	0.20320622	-0.000282198	[ 0.387, 3.526]	[-0.505, 0.266)	[-0.455, 0.275)	0.486	0.468
m	overweight	27	FALSE	FALSE	1	0	4.11	2.38	1.4	34	0.91	5.5	4.9	28.6	1	135	83	FALSE	city_below_20	FALSE	above_average	TRUE	FALSE	TRUE	13	TRUE	102	16.6	22.07142857	0.4258127	0.245358983	-0.356864686	[ 0.387, 3.526]	[-0.505, 0.266)	[-0.455, 0.275)	0.618	0.332
m	normal weight	31.65753425	FALSE	FALSE	0	0	4.48	2.8	1.42	32	0.82	4.8	5	24.25	0.88	120	80	FALSE	city_over_100	TRUE	average	FALSE	TRUE	TRUE	10	FALSE	88	11.9	23.35714286	-0.086139227	-1.203970722	0.548316575	[-0.484, 0.387)	[-2.114,-0.505)	[ 0.275, 5.091]	0.654	0.238
f	normal weight	29.62191781	TRUE	TRUE	0	0	4.01	1.04	2.94	73	0.28	5	5.2	21.86	0.761904762	107	80	FALSE	city_over_100	TRUE	average	FALSE	FALSE	FALSE	13	FALSE	64	17	20.28571429	-0.340331589	-0.7016789	-1.015811637	[-0.484, 0.387)	[-2.114,-0.505)	[-2.656,-0.455)	0.568	0.34
f	overweight	29.62191781	FALSE	TRUE	1	0	2.94	0.79	2.14	73	0.27	5.2	5.3	26.19	0.833333333	125	85	FALSE	city_over_100	TRUE	average	FALSE	FALSE	FALSE	8	FALSE	75	16.8	16.14285714	-0.435321362	-1.495663727	-0.193300966	[-0.484, 0.387)	[-2.114,-0.505)	[-0.455, 0.275)	0.452	0.336
f	normal weight	35.77260274	FALSE	FALSE	1	0	4.74	2.53	2.05	43	0.55	5.2	5	23.15	0.785714286	133	91	FALSE	village	FALSE	average	FALSE	TRUE	TRUE	11	FALSE	77	22.3	21.57142857	0.132924679	0.337050819	0.204761243	[-0.484, 0.387)	[ 0.266, 5.061]	[-0.455, 0.275)	0.604	0.446
m	obese	34.76164384	FALSE	FALSE	4	1	5.25	3.36	0.96	18	2.97	5.2	4.8	33.6	0.947826087	136	94	TRUE	city_over_100	TRUE	average	FALSE	TRUE	FALSE	13	TRUE	109	21.6	12.78571429	0.025477344	-0.684696408	-0.398538005	[-0.484, 0.387)	[-2.114,-0.505)	[-0.455, 0.275)	0.358	0.432
m	overweight	28.41643836	FALSE	FALSE	0	0	5.06	3.6	1.25	25	1.1	5.4	4.8	28.4	0.884210526	115	66	FALSE	city_over_100	TRUE	above_average	TRUE	FALSE	TRUE	12	FALSE	84	26.6	22.28571429	1.41682362	1.756266833	-1.21992146	[ 0.387, 3.526]	[ 0.266, 5.061]	[-2.656,-0.455)	0.624	0.532
f	normal weight	28.02191781	FALSE	FALSE	0	0	4	2.1	1.76	44	0.78	4.7	4.4	23.03	0.789473684	127	80	FALSE	city_over_100	TRUE	above_average	TRUE	FALSE	TRUE	14	FALSE	75	41.3	5.071428571	-1.003532838	2.165025348	-1.264291787	[-2.231,-0.484)	[ 0.266, 5.061]	[-2.656,-0.455)	0.142	0.826
m	normal weight	26.32876712	TRUE	FALSE	0	0	4.49	2.98	1.44	32	0.85	5.4	5.2	23.8497766	0.869565217	101	69	FALSE	village	FALSE	above_average	TRUE	FALSE	TRUE	13	FALSE	80	24.5	10.92857143	-0.61443741	-0.60516172	0.339933297	[-2.231,-0.484)	[-2.114,-0.505)	[ 0.275, 5.091]	0.306	0.49
f	normal weight	23.55068493	FALSE	FALSE	0	0	4.98	3	1.75	35	0.78	4.4	4.8	18.34	0.829268293	122	81	FALSE	city_over_100	TRUE	above_average	TRUE	FALSE	TRUE	9	FALSE	68	16.3	24.78571429	0.366456705	-0.098919242	0.570325109	[-0.484, 0.387)	[-0.505, 0.266)	[ 0.275, 5.091]	0.694	0.326
m	overweight	35.92876712	FALSE	FALSE	3	1	6.06	4.22	1.24	20	1.98	5.5	5.4	25.95	0.96969697	143	96	FALSE	village	FALSE	above_average	TRUE	FALSE	TRUE	14	FALSE	96	13	19.71428571	0.600559194	-0.738284761	-0.543114051	[ 0.387, 3.526]	[-2.114,-0.505)	[-2.656,-0.455)	0.552	0.26
m	overweight	24.33424658	FALSE	FALSE	1	0	6.33	4.91	1.11	18	1.03	5	4.9	25.54	0.858585859	129	82	TRUE	city_below_20	FALSE	average	FALSE	FALSE	FALSE	10	FALSE	85	12.1	8.142857143	0.715014395	-1.330557329	-0.15134741	[ 0.387, 3.526]	[-2.114,-0.505)	[-0.455, 0.275)	0.228	0.242
f	normal weight	33.51780822	TRUE	FALSE	1	0	6.39	3.99	2.02	32	1.34	5.2	5.2	19.83	0.837209302	114	85	FALSE	city_over_100	TRUE	above_average	TRUE	TRUE	TRUE	13	FALSE	72	15.1	24.35714286	-0.711788493	-0.875995075	0.445080011	[-2.231,-0.484)	[-2.114,-0.505)	[ 0.275, 5.091]	0.682	0.302
m	overweight	27.60547945	FALSE	FALSE	0	0	4.55	2.78	1.62	36	0.8	4.9	5	25.46	0.857142857	129	78	FALSE	village	FALSE	average	FALSE	FALSE	TRUE	11	FALSE	90	17.2	24	2.13114294	0.778556858	0.090730856	[ 0.387, 3.526]	[ 0.266, 5.061]	[-0.455, 0.275)	0.672	0.344
f	normal weight	22.79178082	FALSE	FALSE	1	0	5.21	3.25	1.62	31	1.43	4.5	4.4	23.24	0.768421053	131	75	FALSE	city_over_100	TRUE	average	FALSE	FALSE	FALSE	13	FALSE	73	18.8	13.64285714	-0.142108229	0.028765285	1.011206561	[-0.484, 0.387)	[-0.505, 0.266)	[ 0.275, 5.091]	0.382	0.376
f	normal weight	20.71506849	FALSE	FALSE	0	0	5.19	3.03	1.97	38	0.67	4.6	4.7	23.18	0.71	113	75	FALSE	city_over_100	TRUE	average	FALSE	FALSE	FALSE	13	FALSE	71	15.1	8.571428571	-0.500355944	0.717441414	0.88817576	[-2.231,-0.484)	[ 0.266, 5.061]	[ 0.275, 5.091]	0.24	0.302
f	normal weight	18.7369863	FALSE	FALSE	0	0	4.24	1.99	2.12	50	0.83	5.4	4.9	16.73	0.8	115	79	FALSE	village	FALSE	above_average	TRUE	FALSE	FALSE	10	FALSE	68	22.3	27.42857143	0.482141646	-0.580616523	0.391215092	[ 0.387, 3.526]	[-2.114,-0.505)	[ 0.275, 5.091]	0.768	0.446
f	normal weight	26.1260274	FALSE	FALSE	0	0	4.18	2.33	1.95	47	0.66	5.2	4.9	18.04	0.723404255	113	68	FALSE	village	FALSE	average	FALSE	TRUE	TRUE	8	FALSE	68	15.5	21.5	0.136851123	-0.85712716	0.718548645	[-0.484, 0.387)	[-2.114,-0.505)	[ 0.275, 5.091]	0.602	0.31
m	overweight	24.06027397	FALSE	TRUE	2	1	5.46	3.57	1.25	23	2.54	5.3	5.1	26.23	0.942708333	123	71	FALSE	city_over_100	TRUE	average	FALSE	FALSE	FALSE	12	FALSE	90.5	22	10.14285714	-1.604323521	-0.55198275	-0.514567915	[-2.231,-0.484)	[-2.114,-0.505)	[-2.656,-0.455)	0.284	0.44
f	normal weight	34.67945205	TRUE	TRUE	1	0	6.53	4.36	1.93	30	1.25	5.6	5	20.2	0.739130435	107	68	FALSE	city_over_100	TRUE	average	FALSE	TRUE	FALSE	9	FALSE	68	20.3	31.07142857	0.63287319	-0.95997086	-0.075994725	[ 0.387, 3.526]	[-2.114,-0.505)	[-0.455, 0.275)	0.87	0.406
f	normal weight	31.92876712	FALSE	FALSE	0	0	7.53	4.76	2.44	32	0.69	4.7	4.8	19.38	0.721649485	120	79	FALSE	city_below_20	FALSE	above_average	TRUE	FALSE	TRUE	7	FALSE	70	8.7	7.428571429	-1.149803726	-0.623576324	0.037675787	[-2.231,-0.484)	[-2.114,-0.505)	[-0.455, 0.275)	0.208	0.174
m	overweight	31.55890411	FALSE	FALSE	5	1	5.65	3.98	0.94	17	2.62	6	5	28.09	0.93	135	72	TRUE	city_below_20	FALSE	average	FALSE	TRUE	TRUE	11	FALSE	93	13.4	17.71428571	1.068843428	0.25880402	-1.379324191	[ 0.387, 3.526]	[-0.505, 0.266)	[-2.656,-0.455)	0.496	0.268
f	normal weight	24.12054795	FALSE	FALSE	0	0	4.57	2.68	1.68	37	0.53	5.3	4.8	18.69	0.893333333	115	71	TRUE	city_below_20	FALSE	below_average	FALSE	FALSE	TRUE	7	FALSE	67	16.6	13.78571429	-0.346258893	0.208628396	-0.329051408	[-0.484, 0.387)	[-0.505, 0.266)	[-0.455, 0.275)	0.386	0.332
m	overweight	25.77534247	FALSE	TRUE	1	0	6.24	4.47	1.32	21	1.43	5.3	5	26.3	0.989247312	128	80	TRUE	city_over_100	TRUE	average	FALSE	FALSE	TRUE	11	FALSE	92	20.9	18.21428571	0.492747484	-0.415263089	-0.730204638	[ 0.387, 3.526]	[-0.505, 0.266)	[-2.656,-0.455)	0.51	0.418
m	overweight	29.40273973	TRUE	FALSE	1	0	4.86	2.82	1.84	38	0.74	5.3	5.1	26.73	0.907216495	178	117	FALSE	city_over_100	TRUE	above_average	TRUE	FALSE	FALSE	15	FALSE	88	21.6	15.14285714	0.577485234	-0.356714817	0.143199994	[ 0.387, 3.526]	[-0.505, 0.266)	[-0.455, 0.275)	0.424	0.432
f	normal weight	31.42191781	TRUE	FALSE	0	0	5.23	1.84	3.61	63	0.58	5	4.7	21.64	0.813953488	128	75	TRUE	city_over_100	TRUE	above_average	TRUE	FALSE	FALSE	13	FALSE	70	9	22.57142857	0.632901615	-0.504948683	-0.607293133	[ 0.387, 3.526]	[-0.505, 0.266)	[-2.656,-0.455)	0.632	0.18
f	normal weight	19.0630137	FALSE	FALSE	0	0	4.09	2.08	1.86	45	0.81	4.5	5	20.66	0.75	112	70	FALSE	city_below_20	FALSE	average	FALSE	FALSE	FALSE	6	FALSE	72	11.9	8.642857143	-1.386087578	-0.839017049	0.32235627	[-2.231,-0.484)	[-2.114,-0.505)	[ 0.275, 5.091]	0.242	0.238
f	normal weight	23.11506849	TRUE	FALSE	1	0	5.58	3.34	1.95	35	1.02	4	4.8	21.08	0.776055711	151	89	FALSE	city_over_100	TRUE	average	FALSE	TRUE	FALSE	12	FALSE	69.6732	10.8	5.714285714	-1.038602163	-1.226630014	-0.738819587	[-2.231,-0.484)	[-2.114,-0.505)	[-2.656,-0.455)	0.16	0.216
f	normal weight	25.49315068	FALSE	TRUE	0	0	5.25	2.41	2.75	52	0.9	5	5.2	18.73	0.729411765	120	79	FALSE	city_20_100	TRUE	average	FALSE	FALSE	FALSE	7	FALSE	62	19	20.78571429	0.866657304	-0.426597289	1.181765987	[ 0.387, 3.526]	[-0.505, 0.266)	[ 0.275, 5.091]	0.582	0.38
m	normal weight	19.68493151	TRUE	FALSE	1	0	4.2	2.25	1.58	38	1.4	4.5	4.8	24.16	0.831578947	133	87	FALSE	city_over_100	TRUE	average	FALSE	FALSE	FALSE	7	FALSE	79	18.1	10.64285714	-0.805699265	-1.055667181	1.716614093	[-2.231,-0.484)	[-2.114,-0.505)	[ 0.275, 5.091]	0.298	0.362
f	normal weight	32.46575342	TRUE	TRUE	1	0	5.14	2.94	2.17	42	0.76	4.9	5.1	23.6328125	0.773195876	120	85	FALSE	city_20_100	TRUE	below_average	FALSE	FALSE	TRUE	13	FALSE	75	23.4	16.71428571	-0.137081304	-0.252690325	-0.005104101	[-0.484, 0.387)	[-0.505, 0.266)	[-0.455, 0.275)	0.468	0.468
f	normal weight	35.64109589	FALSE	FALSE	0	0	6.84	4.07	2.7	39	0.6	4.7	4.9	21.09	0.680412371	126	80	FALSE	city_below_20	FALSE	average	FALSE	FALSE	FALSE	13	FALSE	66	13	22	0.255097993	-0.594788088	-0.346893477	[-0.484, 0.387)	[-2.114,-0.505)	[-0.455, 0.275)	0.616	0.26
f	normal weight	32.35890411	FALSE	TRUE	0	0	3.83	1.91	1.77	46	0.63	4.9	5	23.18	0.75	128	68	FALSE	city_over_100	TRUE	average	FALSE	FALSE	FALSE	15	FALSE	75	48.5	23.85714286	0.309472153	2.650998546	3.031660687	[-0.484, 0.387)	[ 0.266, 5.061]	[ 0.275, 5.091]	0.668	0.97
m	obese	26.7369863	FALSE	FALSE	1	0	5	2.94	1.93	39	1.2	4.7	5	31.38	0.837837838	192	105	FALSE	city_over_100	TRUE	average	FALSE	FALSE	FALSE	10	FALSE	93	17.7	28.5	0.005289826	-0.780963179	1.036956941	[-0.484, 0.387)	[-2.114,-0.505)	[ 0.275, 5.091]	0.798	0.354
m	obese	29.69589041	FALSE	TRUE	3	1	4.86	3.01	0.93	19	3.19	4.5	5	33.66	0.981818182	152	92	FALSE	city_below_20	FALSE	above_average	TRUE	TRUE	TRUE	8	TRUE	108	47.8	6.071428571	-1.767487027	0.443530119	-0.587462413	[-2.231,-0.484)	[ 0.266, 5.061]	[-2.656,-0.455)	0.17	0.956
f	overweight	32.40821918	FALSE	FALSE	2	1	7.19	4.39	2.09	29	1.91	4.6	5.1	27.12	0.78	121	86	FALSE	city_over_100	TRUE	above_average	TRUE	FALSE	TRUE	13	FALSE	78	30.3	12.35714286	-0.850267219	0.16090006	1.15589622	[-2.231,-0.484)	[-0.505, 0.266)	[ 0.275, 5.091]	0.346	0.606
m	overweight	19.87945205	FALSE	FALSE	1	0	4.17	2.65	1.36	33	0.46	4.4	5	26.15	0.788461538	161	64	FALSE	city_over_100	TRUE	above_average	TRUE	FALSE	FALSE	11	FALSE	82	25.6	18.71428571	-0.983507904	-0.114119878	-0.057068328	[-2.231,-0.484)	[-0.505, 0.266)	[-0.455, 0.275)	0.524	0.512
m	obese	25.88219178	FALSE	FALSE	2	1	4.98	3.27	1.15	23	1.81	5.1	5.2	31.56	0.972727273	175	99	TRUE	city_over_100	TRUE	above_average	TRUE	TRUE	FALSE	8	TRUE	107	15.8	19.42857143	0.349439492	-1.142110679	0.105198796	[-0.484, 0.387)	[-2.114,-0.505)	[-0.455, 0.275)	0.544	0.316
f	normal weight	23.04931507	FALSE	FALSE	0	0	4.06	2.08	1.75	43	0.83	4.5	4.5	22.68	0.770833333	123	75	FALSE	village	FALSE	average	FALSE	TRUE	TRUE	9	FALSE	74	16.3	8.214285714	-1.170262881	-0.786427085	0.805694052	[-2.231,-0.484)	[-2.114,-0.505)	[ 0.275, 5.091]	0.23	0.326
f	normal weight	24.49315068	FALSE	TRUE	1	0	4.76	2.76	2.03	43	0.64	4.6	5.1	23.23	0.73	124	87	FALSE	city_below_20	FALSE	average	FALSE	FALSE	TRUE	15	FALSE	73	28.4	12.28571429	-1.439033515	-0.793644185	0.98170908	[-2.231,-0.484)	[-2.114,-0.505)	[ 0.275, 5.091]	0.344	0.568
m	obese	34.65479452	FALSE	FALSE	3	1	5.69	4.21	1.19	21	1.19	5.6	5.6	34.42	1.009433962	137	88	FALSE	city_below_20	FALSE	above_average	TRUE	FALSE	TRUE	6	TRUE	107	9.4	43.78571429	2.802357876	-1.038509297	0.797624257	[ 0.387, 3.526]	[-2.114,-0.505)	[ 0.275, 5.091]	1.226	0.188
m	normal weight	24.56712329	TRUE	FALSE	1	0	3.86	2.3	1.43	37	0.77	5.2	5.1	21.45061728	0.777777778	136	84	FALSE	city_over_100	TRUE	average	FALSE	FALSE	TRUE	16	FALSE	77	26.3	35.14285714	1.564854384	1.867918937	-0.044431167	[ 0.387, 3.526]	[ 0.266, 5.061]	[-0.455, 0.275)	0.984	0.526
f	overweight	31.21643836	FALSE	FALSE	1	0	3.55	1.54	1.94	55	0.33	5.1	5.2	28.13	0.814814815	140	93	FALSE	city_below_20	FALSE	above_average	TRUE	FALSE	FALSE	13	TRUE	88	17.7	12.85714286	0.338560551	-0.376883274	-0.739010478	[-0.484, 0.387)	[-0.505, 0.266)	[-2.656,-0.455)	0.36	0.354
m	normal weight	27.10958904	FALSE	FALSE	1	0	5.36	2.93	2.39	45	0.68	5.1	5	18.59	0.734042553	119	82	FALSE	city_20_100	TRUE	average	FALSE	FALSE	TRUE	23	FALSE	69	47.8	19.28571429	0.344576134	0.826902309	-0.307150375	[-0.484, 0.387)	[ 0.266, 5.061]	[-0.455, 0.275)	0.54	0.956
m	normal weight	23.97808219	FALSE	FALSE	2	1	3.64	2.33	0.97	27	0.96	4.4	4.5	23.12	0.783505155	130	77	FALSE	city_over_100	TRUE	below_average	FALSE	FALSE	FALSE	21	FALSE	76	30.9	21.5	-0.190759303	-0.849271003	1.437090095	[-0.484, 0.387)	[-2.114,-0.505)	[ 0.275, 5.091]	0.602	0.618
m	normal weight	23.2739726	TRUE	FALSE	1	0	4.16	2.53	1.42	34	1.3	5.2	4.9	20.29	0.806818182	134	87	FALSE	city_over_100	TRUE	average	FALSE	FALSE	FALSE	15	FALSE	71	47	17.21428571	-0.242841007	0.680903456	2.071774442	[-0.484, 0.387)	[ 0.266, 5.061]	[ 0.275, 5.091]	0.482	0.94
f	normal weight	26.43561644	TRUE	TRUE	1	0	7.15	4.8	2.06	29	1.44	4.2	4.7	22.23	0.726315789	131	86	FALSE	city_over_100	TRUE	average	FALSE	TRUE	TRUE	13	FALSE	69	15.1	4.5	-2.034988767	-1.28749618	0.747292952	[-2.231,-0.484)	[-2.114,-0.505)	[ 0.275, 5.091]	0.126	0.302
m	normal weight	22.28219178	FALSE	FALSE	3	1	5.39	3.71	1.28	24	1.84	5.1	4.8	24.69	0.807692308	150	74	FALSE	village	FALSE	average	FALSE	FALSE	FALSE	15	FALSE	84	49.6	31.71428571	0.369684782	0.83918111	1.87772635	[-0.484, 0.387)	[ 0.266, 5.061]	[ 0.275, 5.091]	0.888	0.992
m	normal weight	18.04109589	FALSE	FALSE	1	0	4.39	2.92	1.22	28	1.15	4.9	4.9	23.6294896	0.769230769	131	86	FALSE	village	FALSE	average	FALSE	FALSE	FALSE	12	FALSE	80	11.1	22.14285714	0.017149755	-0.67952132	0.909616773	[-0.484, 0.387)	[-2.114,-0.505)	[ 0.275, 5.091]	0.62	0.222
m	overweight	26.32328767	FALSE	FALSE	2	1	5.46	3.36	2.15	39	0.4	5.5	5.1	26.86	0.805555556	146	106	FALSE	city_over_100	TRUE	above_average	TRUE	FALSE	TRUE	9	FALSE	87	30.6	12.07142857	-1.272191906	-0.664870454	-1.46528527	[-2.231,-0.484)	[-2.114,-0.505)	[-2.656,-0.455)	0.338	0.612
f	normal weight	27.27945205	FALSE	FALSE	1	0	4.6	2.68	1.81	39	0.48	4.9	5.1	20.2	0.731182796	124	85	FALSE	city_over_100	TRUE	average	FALSE	TRUE	FALSE	15	FALSE	68	12	24.71428571	0.964970987	-0.68129506	0.284244839	[ 0.387, 3.526]	[-2.114,-0.505)	[ 0.275, 5.091]	0.692	0.24
m	obese	26.67123288	FALSE	TRUE	1	0	4.17	2.73	1.25	30	0.61	4.6	4.8	30.31	0.90990991	151	91	FALSE	city_over_100	TRUE	average	FALSE	FALSE	FALSE	15	FALSE	101	28.4	19.35714286	1.005199207	0.901907618	-1.706075433	[ 0.387, 3.526]	[ 0.266, 5.061]	[-2.656,-0.455)	0.542	0.568
m	obese	35.69041096	TRUE	FALSE	2	1	5.2	3.59	1.25	24	1.3	4.8	4.9	34.35064077	0.99122807	131	82	FALSE	city_over_100	TRUE	average	FALSE	TRUE	FALSE	15	TRUE	113	19.5	42.21428571	1.131614661	0.389502963	2.539025953	[ 0.387, 3.526]	[ 0.266, 5.061]	[ 0.275, 5.091]	1.182	0.39
m	overweight	26.95616438	FALSE	FALSE	2	1	5.43	3.88	1.2	22	0.96	4.2	4.5	27.06	0.805825243	152	94	FALSE	city_over_100	TRUE	above_average	TRUE	FALSE	FALSE	11	FALSE	83	35.1	22.07142857	2.128377412	2.718729563	-0.553386787	[ 0.387, 3.526]	[ 0.266, 5.061]	[-2.656,-0.455)	0.618	0.702
m	overweight	26.58082192	FALSE	FALSE	2	1	5.3	3.55	1.45	27	0.78	5.1	4.6	25.95	0.83	147	89	FALSE	city_over_100	TRUE	average	FALSE	FALSE	FALSE	10	FALSE	83	10.5	16.42857143	-0.481468766	-0.837910628	0.409171358	[-0.484, 0.387)	[-2.114,-0.505)	[ 0.275, 5.091]	0.46	0.21
m	normal weight	19.8	FALSE	FALSE	2	1	5.97	4.31	1.36	23	1	4.9	4.5	20.57	0.816326531	130	90	FALSE	city_over_100	TRUE	average	FALSE	FALSE	FALSE	12	FALSE	80	8.9	32	0.804659732	-1.26172449	-0.807915503	[ 0.387, 3.526]	[-2.114,-0.505)	[-2.656,-0.455)	0.896	0.178
f	normal weight	35.16712329	TRUE	FALSE	2	1	4.55	3.03	0.97	21	1.59	4.5	4.8	23.18	0.816326531	134	86	FALSE	city_20_100	TRUE	average	FALSE	FALSE	TRUE	13	FALSE	80	20.2	16.71428571	-0.905259404	-0.272793089	1.235756288	[-2.231,-0.484)	[-0.505, 0.266)	[ 0.275, 5.091]	0.468	0.404
m	overweight	25.56164384	TRUE	FALSE	2	1	5.55	3.73	1.5	27	1.16	5.4	5.2	28.09	0.907407407	153	88	FALSE	city_20_100	TRUE	above_average	TRUE	FALSE	TRUE	9	FALSE	98	16.6	18.71428571	-0.642446461	-0.589507989	-0.334534324	[-2.231,-0.484)	[-2.114,-0.505)	[-0.455, 0.275)	0.524	0.332
f	normal weight	25.33150685	FALSE	FALSE	0	0	6.35	4.42	1.54	24	0.81	4.6	4.9	22.78	0.764705882	119	81	FALSE	city_over_100	TRUE	average	FALSE	FALSE	TRUE	21	FALSE	78	29.9	13.85714286	-0.84035724	0.766732944	-0.567972445	[-2.231,-0.484)	[ 0.266, 5.061]	[-2.656,-0.455)	0.388	0.598
m	normal weight	30.7260274	FALSE	TRUE	0	0	3.95	2.48	1.23	31	0.65	4.4	4.9	22.4	0.787878788	127	68	FALSE	city_over_100	TRUE	above_average	TRUE	FALSE	TRUE	17	FALSE	78	32.4	15.14285714	-0.852497388	0.039209705	-0.996629547	[-2.231,-0.484)	[-0.505, 0.266)	[-2.656,-0.455)	0.424	0.648
f	normal weight	25.34520548	FALSE	FALSE	1	0	4.23	2.02	2.07	49	0.76	5.1	5	23.05	0.765957447	130	83	FALSE	city_20_100	TRUE	average	FALSE	TRUE	TRUE	16	FALSE	72	19.4	33.42857143	0.438180627	-0.721542978	-0.698665673	[ 0.387, 3.526]	[-2.114,-0.505)	[-2.656,-0.455)	0.936	0.388
m	overweight	28.53972603	FALSE	FALSE	0	0	4.64	2.71	1.66	36	0.85	5.3	4.8	26.12	0.958762887	119.716	74.656	TRUE	city_20_100	TRUE	average	FALSE	TRUE	TRUE	14	FALSE	93	10	16.21428571	-0.286814926	-0.219820136	-1.672836762	[-0.484, 0.387)	[-0.505, 0.266)	[-2.656,-0.455)	0.454	0.2
f	normal weight	33.60273973	TRUE	FALSE	0	0	5.58	3.32	2.07	37	0.47	5.2	4.9	19.13	0.75	109	69	FALSE	city_over_100	TRUE	below_average	FALSE	FALSE	TRUE	12	FALSE	66	33.4	13.71428571	-0.051290441	2.707092202	-1.358521095	[-0.484, 0.387)	[ 0.266, 5.061]	[-2.656,-0.455)	0.384	0.668
f	normal weight	31.55616438	TRUE	FALSE	1	0	5.63	3.67	1.69	30	1.31	6.3	5.1	20.68515024	0.731958763	88	51	FALSE	city_over_100	TRUE	above_average	TRUE	FALSE	TRUE	14	FALSE	71	31.7	3.285714286	-1.611664261	0.969476813	-0.684700349	[-2.231,-0.484)	[ 0.266, 5.061]	[-2.656,-0.455)	0.092	0.634
m	normal weight	31.18082192	TRUE	FALSE	1	0	3.29	1.63	1.42	43	0.68	5.2	4.5	23.36	0.838383838	131	80	FALSE	city_over_100	TRUE	average	FALSE	FALSE	FALSE	11	FALSE	83	22.4	21.35714286	1.473020108	0.216220308	1.185142827	[ 0.387, 3.526]	[-0.505, 0.266)	[ 0.275, 5.091]	0.598	0.448
m	normal weight	25.76438356	FALSE	FALSE	3	1	5.87	3.91	1.34	23	1.89	5	5.1	23.67	0.869565217	135	82	FALSE	village	FALSE	above_average	TRUE	FALSE	FALSE	17	FALSE	80	14.8	23.71428571	0.487286165	-0.03933518	-1.573760688	[ 0.387, 3.526]	[-0.505, 0.266)	[-2.656,-0.455)	0.664	0.296
m	overweight	34.55890411	TRUE	TRUE	2	1	5.78	3.86	1.56	27	0.82	4.9	5	25.76	0.93	145	91	FALSE	village	FALSE	average	FALSE	FALSE	FALSE	12	FALSE	93	23.1	13.57142857	0.260020063	0.385398692	-1.480279601	[-0.484, 0.387)	[ 0.266, 5.061]	[-2.656,-0.455)	0.38	0.462
f	normal weight	24.00547945	FALSE	TRUE	0	0	4.2	2.21	1.8	43	0.58	4.3	4.9	18.21	0.709677419	115.5223333	72.932	FALSE	village	FALSE	above_average	TRUE	FALSE	TRUE	20	FALSE	66	22.4	10.35714286	-1.476016511	-0.779651405	-0.12281969	[-2.231,-0.484)	[-2.114,-0.505)	[-0.455, 0.275)	0.29	0.448
m	normal weight	19.6630137	FALSE	FALSE	1	0	6.68	4.49	2.14	32	0.96	5	5.1	17.67	0.761363636	122	76	FALSE	city_below_20	FALSE	average	FALSE	TRUE	FALSE	10	FALSE	67	4	7.857142857	-0.289981962	-0.80985621	-0.664179028	[-0.484, 0.387)	[-2.114,-0.505)	[-2.656,-0.455)	0.22	0.08
f	overweight	20.62739726	FALSE	FALSE	1	0	3.48	1.76	1.55	45	0.7	4.8	5.3	26.03	0.790909091	131	93	FALSE	city_20_100	TRUE	above_average	TRUE	FALSE	FALSE	12	FALSE	87	23.7	28	1.266475367	0.925232516	-0.643862134	[ 0.387, 3.526]	[ 0.266, 5.061]	[-2.656,-0.455)	0.784	0.474
m	normal weight	31.59726027	FALSE	FALSE	1	0	4.48	2.84	1.53	34	0.67	4.8	4.7	22.63	0.824742268	138	100	FALSE	city_below_20	FALSE	average	FALSE	TRUE	TRUE	12	FALSE	80	26.3	8.714285714	-0.743109865	0.00068786	-0.554657378	[-2.231,-0.484)	[-0.505, 0.266)	[-2.656,-0.455)	0.244	0.526
f	overweight	20.94794521	FALSE	FALSE	2	1	3.79	2.2	1.07	28	1.43	4.8	4.9	26.81	0.754716981	134	84	TRUE	city_20_100	TRUE	average	FALSE	FALSE	FALSE	15	FALSE	80	2.9	14.57142857	-0.235817238	-0.71764642	0.177840835	[-0.484, 0.387)	[-2.114,-0.505)	[-0.455, 0.275)	0.408	0.058
m	normal weight	22.79726027	FALSE	FALSE	1	0	3.39	1.05	2.1	62	0.49	4.6	5.1	24.42	0.778846154	138	79	FALSE	city_over_100	TRUE	average	FALSE	FALSE	FALSE	19	FALSE	81	12.6	9.928571429	-0.807396644	0.052176866	-0.708134767	[-2.231,-0.484)	[-0.505, 0.266)	[-2.656,-0.455)	0.278	0.252
f	normal weight	24.63561644	FALSE	FALSE	1	0	5.23	3.12	1.34	26	2.38	4.4	4.9	19.13	0.703296703	114	72	FALSE	city_over_100	TRUE	average	FALSE	FALSE	FALSE	20	FALSE	64	36	17	-1.344357061	1.985347452	0.612407061	[-2.231,-0.484)	[ 0.266, 5.061]	[ 0.275, 5.091]	0.476	0.72
m	normal weight	28.88493151	TRUE	FALSE	1	0	4.48	2.42	1.77	40	1.51	5.9	4.9	20.57	0.793814433	104	50	TRUE	city_over_100	TRUE	average	FALSE	FALSE	FALSE	8	FALSE	77	20.6	19.28571429	-1.043184012	-0.308144026	1.297603214	[-2.231,-0.484)	[-0.505, 0.266)	[ 0.275, 5.091]	0.54	0.412
f	normal weight	22.73150685	FALSE	FALSE	0	0	4.23	1.72	2.2	52	0.58	5.1	4.7	19.53	0.711111111	118	83	FALSE	city_over_100	TRUE	average	FALSE	FALSE	TRUE	16	FALSE	64	22.7	31.5	0.834984428	-0.61055675	-1.58321276	[ 0.387, 3.526]	[-2.114,-0.505)	[-2.656,-0.455)	0.882	0.454
f	normal weight	22.84383562	TRUE	TRUE	1	0	4.35	1.61	2.32	53	1.03	4.6	5.1	18.81	0.717391304	132	76	FALSE	city_over_100	TRUE	average	FALSE	TRUE	FALSE	15	FALSE	66	31.6	19.42857143	-1.107451232	-0.227228708	-0.338188878	[-2.231,-0.484)	[-0.505, 0.266)	[-0.455, 0.275)	0.544	0.632
m	normal weight	20.69863014	FALSE	FALSE	0	0	3.35	2.02	1.11	33	0.64	5.1	4.8	24.22145329	0.864583333	123.649	70.7525	TRUE	city_below_20	FALSE	below_average	FALSE	FALSE	FALSE	13	FALSE	83	8.2	28.42771429	2.251549954	-0.028885854	0.172099629	[ 0.387, 3.526]	[-0.505, 0.266)	[-0.455, 0.275)	0.795998	0.164
m	normal weight	29.14794521	FALSE	FALSE	1	0	4.26	1.8	2.06	48	1.13	4.9	5.1	20.29	0.782608696	124	85	TRUE	city_over_100	TRUE	average	FALSE	TRUE	FALSE	12	FALSE	72	9.4	16.14285714	0.696035383	-0.954977373	-0.060000106	[ 0.387, 3.526]	[-2.114,-0.505)	[-0.455, 0.275)	0.452	0.188
f	normal weight	25.21369863	FALSE	FALSE	1	0	6.21	3.37	2.35	38	1.47	4.8	4.8	19.57	0.692307692	123	97	FALSE	city_20_100	TRUE	below_average	FALSE	TRUE	TRUE	19	FALSE	63	19.4	25.28571429	-0.134124365	-1.161216936	0.643465335	[-0.484, 0.387)	[-2.114,-0.505)	[ 0.275, 5.091]	0.708	0.388
m	overweight	26.33424658	FALSE	FALSE	2	1	5.63	3.65	1.75	31	0.79	5.7	5.2	27.78	0.777777778	134.469	82.934	FALSE	city_20_100	TRUE	average	FALSE	FALSE	TRUE	15	FALSE	84	26.4	6.142857143	-1.513259771	0.818872101	-0.456481371	[-2.231,-0.484)	[ 0.266, 5.061]	[-2.656,-0.455)	0.172	0.528
f	normal weight	26.91506849	FALSE	TRUE	1	0	4.37	1.85	2.28	52	1.37	4.5	4.9	18.96	0.692307692	143	90	TRUE	city_below_20	FALSE	average	FALSE	FALSE	TRUE	21	FALSE	63	46.3	7.714285714	-1.684783539	0.621735508	2.469483488	[-2.231,-0.484)	[ 0.266, 5.061]	[ 0.275, 5.091]	0.216	0.926
f	overweight	25.64931507	TRUE	FALSE	2	1	3.95	2.01	1.81	46	0.92	5.9	5	26.12	0.725663717	142	86	FALSE	village	FALSE	above_average	TRUE	FALSE	FALSE	16	FALSE	82	46.3	12.07142857	-1.793084158	1.456898448	1.642937767	[-2.231,-0.484)	[ 0.266, 5.061]	[ 0.275, 5.091]	0.338	0.926
f	normal weight	31.60821918	FALSE	FALSE	1	0	6.24	3.41	2.39	38	0.84	4.7	4.8	20.82	0.744444444	121	86	TRUE	city_over_100	TRUE	below_average	FALSE	TRUE	FALSE	23	FALSE	67	21.5	29.28571429	0.677476343	1.061025438	-1.349207551	[ 0.387, 3.526]	[ 0.266, 5.061]	[-2.656,-0.455)	0.82	0.43
f	normal weight	25.7260274	FALSE	FALSE	0	0	4.84	3.15	1.36	28	0.78	5.3	4.9	21.97	0.77	104	64	FALSE	city_20_100	TRUE	average	FALSE	FALSE	FALSE	21	FALSE	77	17.7	15.21428571	0.628016587	-0.095994164	0.192828318	[ 0.387, 3.526]	[-0.505, 0.266)	[-0.455, 0.275)	0.426	0.354
m	normal weight	23.09041096	TRUE	FALSE	0	0	4.18	2.65	1.53	37	0.53	5.1	4.6	22.62725882	0.85	123	67	FALSE	city_over_100	TRUE	average	FALSE	TRUE	FALSE	7	FALSE	85	10.1	16.42857143	-0.859599767	-1.352726108	-0.086111616	[-2.231,-0.484)	[-2.114,-0.505)	[-0.455, 0.275)	0.46	0.202
m	normal weight	24.5369863	FALSE	FALSE	1	0	4.58	3.17	0.91	20	1.35	5.2	5.1	24.92	0.866666667	126	74	FALSE	city_over_100	TRUE	average	FALSE	TRUE	TRUE	12	FALSE	91	6.8	14.85714286	-0.368867654	-2.113873985	0.022826433	[-0.484, 0.387)	[-2.114,-0.505)	[-0.455, 0.275)	0.416	0.136
f	normal weight	24.41917808	FALSE	FALSE	1	0	4.72	2.38	2.17	46	0.53	5.6	5.1	20.96	0.690721649	112	75	FALSE	city_over_100	TRUE	average	FALSE	FALSE	FALSE	17	FALSE	67	25.1	9.214285714	-1.470511333	0.78493772	-0.701911186	[-2.231,-0.484)	[ 0.266, 5.061]	[-2.656,-0.455)	0.258	0.502
m	normal weight	34.06849315	FALSE	FALSE	0	0	4.19	2.3	1.47	35	1.23	5.2	4.9	20	0.84	109	79	FALSE	village	FALSE	average	FALSE	TRUE	FALSE	11	FALSE	84	13	12.07142857	-0.579787773	-0.029975637	-1.104518696	[-2.231,-0.484)	[-0.505, 0.266)	[-2.656,-0.455)	0.338	0.26
m	normal weight	28.78630137	FALSE	FALSE	1	0	3.9	1.91	1.72	44	0.77	5.2	4.8	23.96	0.841584158	146	83	FALSE	city_over_100	TRUE	average	FALSE	FALSE	TRUE	7	FALSE	85	24.9	13.35714286	-0.278682801	0.43719103	-1.001205341	[-0.484, 0.387)	[ 0.266, 5.061]	[-2.656,-0.455)	0.374	0.498
f	normal weight	24.71232877	FALSE	FALSE	1	0	4	2.1	1.76	44	0.44	4.8	4.6	19.05	0.719101124	142	100	FALSE	city_below_20	FALSE	above_average	TRUE	FALSE	TRUE	13	FALSE	64	19.4	28.42857143	0.840702409	-0.476344866	0.59923178	[ 0.387, 3.526]	[-0.505, 0.266)	[ 0.275, 5.091]	0.796	0.388
m	overweight	29.25753425	FALSE	FALSE	2	1	5.25	3.47	1.29	25	0.81	5.6	4.6	26.83	0.864864865	120	50	FALSE	city_below_20	FALSE	above_average	TRUE	FALSE	FALSE	13	FALSE	96	29.1	20	-0.323709265	0.339863719	-0.873840173	[-0.484, 0.387)	[ 0.266, 5.061]	[-2.656,-0.455)	0.56	0.582
m	normal weight	29.26027397	FALSE	TRUE	0	0	4.53	2.99	1.17	26	0.83	4.4	5	20.82	0.811881188	129	76	TRUE	city_over_100	TRUE	above_average	TRUE	FALSE	FALSE	13	FALSE	82	30.9	32.07142857	1.411690603	-0.059538813	1.177426775	[ 0.387, 3.526]	[-0.505, 0.266)	[ 0.275, 5.091]	0.898	0.618
f	normal weight	24.22739726	FALSE	FALSE	0	0	5.13	3.13	1.67	33	0.83	4.4	4.8	18.25	0.701149425	104	68	FALSE	city_below_20	FALSE	average	FALSE	TRUE	TRUE	9	FALSE	61	14.5	21.35714286	0.471225187	-0.709286844	-0.38826244	[ 0.387, 3.526]	[-2.114,-0.505)	[-0.455, 0.275)	0.598	0.29
f	normal weight	26.22191781	FALSE	FALSE	1	0	5.26	3.21	1.87	36	0.63	4.7	4.7	18.42	0.784090909	142	86	FALSE	city_below_20	FALSE	average	FALSE	TRUE	TRUE	12	FALSE	69	28.4	24.78571429	0.775909051	0.862365538	-0.754661679	[ 0.387, 3.526]	[ 0.266, 5.061]	[-2.656,-0.455)	0.694	0.568
m	normal weight	26.95068493	FALSE	FALSE	1	0	3.83	2.18	1.23	32	1.58	5.3	5.1	24.69	0.854368932	136	82	FALSE	village	FALSE	average	FALSE	TRUE	TRUE	8	FALSE	88	16.6	24.28571429	0.979566055	0.152059694	-0.45499097	[ 0.387, 3.526]	[-0.505, 0.266)	[-0.455, 0.275)	0.68	0.332
m	obese	23.85205479	TRUE	FALSE	2	1	5.56	4.05	1.26	23	1.17	5.5	5.2	32	1.01	132	75	TRUE	village	FALSE	above_average	TRUE	FALSE	FALSE	9	FALSE	101	22	7.642857143	0.929702224	1.998577215	0.554698593	[ 0.387, 3.526]	[ 0.266, 5.061]	[ 0.275, 5.091]	0.214	0.44
f	normal weight	24.33424658	FALSE	FALSE	1	0	4.79	2.6	1.97	41	0.65	5	4.5	20.04	0.705263158	129	91	FALSE	city_below_20	FALSE	average	FALSE	FALSE	FALSE	22	FALSE	67	37.1	16.54114286	-0.146149846	1.156260028	1.123956488	[-0.484, 0.387)	[ 0.266, 5.061]	[ 0.275, 5.091]	0.464076	0.742
m	overweight	18.57260274	FALSE	FALSE	1	0	4.22	2.25	1.66	39	0.59	5	4.6	26.95	0.846153846	139	80	FALSE	village	FALSE	average	FALSE	FALSE	FALSE	12	FALSE	88	21.2	17.78571429	0.405842786	0.212781197	0.158388428	[ 0.387, 3.526]	[-0.505, 0.266)	[-0.455, 0.275)	0.498	0.424
f	normal weight	24.58630137	FALSE	FALSE	0	0	3.93	1.82	1.69	43	1.2	4.6	4.7	15.22	0.722891566	123	83	FALSE	city_over_100	TRUE	below_average	FALSE	TRUE	FALSE	18	FALSE	60	6.8	23.35714286	0.542022253	-0.984639466	-0.941421894	[ 0.387, 3.526]	[-2.114,-0.505)	[-2.656,-0.455)	0.654	0.136
m	normal weight	27.6109589	FALSE	FALSE	2	1	5.53	3.38	1.87	34	0.69	4.8	4.9	20.9	0.827956989	125	86	FALSE	city_over_100	TRUE	average	FALSE	FALSE	FALSE	22	FALSE	77	32.8	27.71428571	0.390845767	1.767218258	-1.056622354	[ 0.387, 3.526]	[ 0.266, 5.061]	[-2.656,-0.455)	0.776	0.656
m	normal weight	22.88767123	FALSE	FALSE	1	0	3.77	2.23	1.36	36	0.64	4.2	5.1	24.94	0.846153846	132	83	FALSE	city_20_100	TRUE	below_average	FALSE	FALSE	FALSE	10	FALSE	77	14.4	13.85714286	-1.044713283	-0.799277957	-1.009735349	[-2.231,-0.484)	[-2.114,-0.505)	[-2.656,-0.455)	0.388	0.288
m	normal weight	28.33424658	FALSE	FALSE	1	0	4.92	3.1	1.32	27	0.89	4.5	5	19.25	0.818181818	131	105	FALSE	city_over_100	TRUE	average	FALSE	FALSE	TRUE	14	FALSE	72	22.4	8.285714286	-0.337283039	1.08879933	-1.003512828	[-0.484, 0.387)	[ 0.266, 5.061]	[-2.656,-0.455)	0.232	0.448
m	normal weight	29	FALSE	FALSE	1	0	4.83	2.93	1.74	36	0.61	4.6	4.3	22.34	0.808080808	134	85	FALSE	city_over_100	TRUE	average	FALSE	FALSE	TRUE	9	FALSE	80	29.6	22.42857143	0.361488992	1.084197273	-0.736856807	[-0.484, 0.387)	[ 0.266, 5.061]	[-2.656,-0.455)	0.628	0.592
m	normal weight	25.76986301	FALSE	FALSE	3	1	7.7	4.93	2.01	26	1.96	4.6	5	23.31	0.833333333	129	98	FALSE	city_over_100	TRUE	above_average	TRUE	FALSE	FALSE	21	FALSE	80	26.7	14.35714286	0.466864317	1.224720239	-1.91882494	[ 0.387, 3.526]	[ 0.266, 5.061]	[-2.656,-0.455)	0.402	0.534
m	overweight	24.92328767	FALSE	FALSE	0	0	4.29	2.39	1.52	35	0.8	4.6	5	26.2	0.817307692	128	84	FALSE	city_over_100	TRUE	above_average	TRUE	FALSE	FALSE	21	FALSE	85	21	9.714285714	-0.836296501	0.616568328	-1.387434923	[-2.231,-0.484)	[ 0.266, 5.061]	[-2.656,-0.455)	0.272	0.42
f	normal weight	23.8	FALSE	FALSE	0	0	5.21	2	3.07	59	0.41	4.8	4.6	20.96	0.90625	121	69	FALSE	village	FALSE	average	FALSE	FALSE	TRUE	19	FALSE	58	36.3	2.928571429	-1.402910353	2.085071228	-1.51433152	[-2.231,-0.484)	[ 0.266, 5.061]	[-2.656,-0.455)	0.082	0.726
m	overweight	29.91232877	TRUE	FALSE	2	1	5.47	3.29	1.52	28	2.28	5	5	25.22786458	0.918181818	115	65	TRUE	city_20_100	TRUE	above_average	TRUE	FALSE	TRUE	11	FALSE	101	13	25.85714286	0.832637514	-0.532927187	-1.441489006	[ 0.387, 3.526]	[-2.114,-0.505)	[-2.656,-0.455)	0.724	0.26
m	normal weight	22.55616438	TRUE	FALSE	2	1	4.73	3.22	1.35	29	0.75	5.9	5.3	23.51020408	0.913043478	131	76	TRUE	village	FALSE	average	FALSE	FALSE	FALSE	9	FALSE	84	8.2	38.92857143	3.525887025	-0.124669194	0.136524476	[ 0.387, 3.526]	[-0.505, 0.266)	[-0.455, 0.275)	1.09	0.164
f	normal weight	24.42191781	FALSE	FALSE	1	0	4.91	1.94	2.73	56	0.67	4.5	4.5	20.76	0.78021978	133	62	FALSE	city_below_20	FALSE	average	FALSE	FALSE	FALSE	20	FALSE	71	25.6	0.214285714	-1.797905961	2.883559808	-1.963793511	[-2.231,-0.484)	[ 0.266, 5.061]	[-2.656,-0.455)	0.006	0.512
m	normal weight	30.55342466	FALSE	FALSE	1	0	3.81	1.73	1.74	46	0.91	5.2	4.9	22.86	0.787234043	129	85	FALSE	city_over_100	TRUE	average	FALSE	FALSE	FALSE	12	FALSE	74	20.6	14.35714286	-0.58491475	0.806434195	-0.717368502	[-2.231,-0.484)	[ 0.266, 5.061]	[-2.656,-0.455)	0.402	0.412
f	normal weight	25.30958904	FALSE	FALSE	1	0	4.12	1.91	2.01	49	0.59	4.3	4.4	21.79	0.764705882	139	93	FALSE	city_over_100	TRUE	above_average	TRUE	TRUE	TRUE	15	FALSE	65	12.3	13.57142857	-1.428487454	-0.818992897	-0.227838664	[-2.231,-0.484)	[-2.114,-0.505)	[-0.455, 0.275)	0.38	0.246
m	normal weight	27.69863014	FALSE	FALSE	0	0	4.09	2.8	1.11	27	1	5	4.6	20.91	0.810526316	118	81	FALSE	city_20_100	TRUE	above_average	TRUE	FALSE	TRUE	9	FALSE	77	14.5	11.5	-0.775734351	-0.632652927	0.118226354	[-2.231,-0.484)	[-2.114,-0.505)	[-0.455, 0.275)	0.322	0.29
f	overweight	31.71780822	FALSE	FALSE	2	1	4.27	2.36	1.29	30	1.78	5.2	4.9	26.3	0.788990826	122	94	FALSE	city_over_100	TRUE	average	FALSE	FALSE	TRUE	20	FALSE	86	19.1	21.07142857	-0.259541964	0.026414696	-1.419216712	[-0.484, 0.387)	[-0.505, 0.266)	[-2.656,-0.455)	0.59	0.382
m	normal weight	26.11780822	FALSE	FALSE	1	0	4.9	3.14	1.4	29	0.9	4.9	5	21.15	0.783505155	130	71	FALSE	city_over_100	TRUE	average	FALSE	FALSE	FALSE	23	FALSE	76	17.1	14.11978571	-0.580061526	-0.652564952	0.148266107	[-2.231,-0.484)	[-2.114,-0.505)	[-0.455, 0.275)	0.39423	0.342
f	normal weight	26.29863014	FALSE	FALSE	1	0	5.24	3.37	1.26	24	1.66	4.5	4.7	20.43	0.744444444	105	62	FALSE	city_over_100	TRUE	average	FALSE	FALSE	TRUE	15	FALSE	67	12.6	25.92857143	-0.633765674	0.743003543	0.362444382	[-2.231,-0.484)	[ 0.266, 5.061]	[ 0.275, 5.091]	0.726	0.252
f	normal weight	24.34520548	FALSE	FALSE	0	0	6.19	2.9	3.49	56	0.67	4.8	4.5	19.82	0.67	111	65	TRUE	village	FALSE	average	FALSE	FALSE	FALSE	16	FALSE	67	21.3	10.5	-0.651828522	1.237042044	-0.947329592	[-2.231,-0.484)	[ 0.266, 5.061]	[-2.656,-0.455)	0.294	0.426
m	overweight	24.50410959	FALSE	FALSE	2	1	6.02	4.2	1.15	19	0.99	5.2	4.6	26.28	0.839622642	138	91	FALSE	city_20_100	TRUE	average	FALSE	FALSE	FALSE	20	FALSE	89	24.6	5.357142857	-0.43045742	0.890640656	-1.533797197	[-0.484, 0.387)	[ 0.266, 5.061]	[-2.656,-0.455)	0.15	0.492
f	normal weight	28.67123288	FALSE	FALSE	1	0	4.81	2.37	2.14	44	0.7	4.9	4.6	24.96	0.706422018	137	83	TRUE	city_over_100	TRUE	above_average	TRUE	FALSE	TRUE	16	FALSE	77	23	6.071428571	0.201427521	1.22378083	-0.523434513	[-0.484, 0.387)	[ 0.266, 5.061]	[-2.656,-0.455)	0.17	0.46
f	overweight	24.23013699	TRUE	FALSE	0	0	4.79	3.06	1.51	32	1.26	5	4.6	28.57796068	0.87	119	70	FALSE	city_over_100	TRUE	average	FALSE	FALSE	FALSE	21	FALSE	87	43.1	21.28571429	0.029689628	0.105440597	0.540485245	[-0.484, 0.387)	[-0.505, 0.266)	[ 0.275, 5.091]	0.596	0.862
m	overweight	25.6109589	FALSE	FALSE	1	0	3.93	2.62	0.99	25	0.66	4.4	4.9	25.31	0.924731183	113	79	TRUE	city_over_100	TRUE	average	FALSE	FALSE	TRUE	17	FALSE	86	27	12.35714286	-0.30080012	0.741742031	-0.373855821	[-0.484, 0.387)	[ 0.266, 5.061]	[-0.455, 0.275)	0.346	0.54
f	normal weight	31.84109589	FALSE	FALSE	0	0	4.47	2.42	1.88	42	0.51	4.8	4.8	22.86	0.784946237	113	67	TRUE	city_over_100	TRUE	average	FALSE	FALSE	FALSE	9	FALSE	73	33.4	4.285714286	-1.706534892	0.416827209	-0.361706811	[-2.231,-0.484)	[ 0.266, 5.061]	[-0.455, 0.275)	0.12	0.668
m	normal weight	26.38356164	FALSE	FALSE	3	1	7.93	5.82	1.53	19	1.91	5.4	5.2	24.15	0.862745098	152	90	FALSE	city_over_100	TRUE	average	FALSE	FALSE	TRUE	15	FALSE	88	6.2	11.64285714	-0.410586917	-0.963855102	0.297022971	[-0.484, 0.387)	[-2.114,-0.505)	[ 0.275, 5.091]	0.326	0.124
m	normal weight	27.21643836	FALSE	FALSE	1	0	3.53	2.02	1.23	35	0.75	5.1	4.6	20.06	0.808510638	133	90	FALSE	city_20_100	TRUE	average	FALSE	FALSE	FALSE	22	FALSE	76	13.3	19.78571429	0.038661636	-0.122545692	-0.83303691	[-0.484, 0.387)	[-0.505, 0.266)	[-2.656,-0.455)	0.554	0.266
f	normal weight	34.00821918	FALSE	FALSE	1	0	4.17	2.3	1.71	41	0.57	4.3	4.6	19.47	0.72826087	136	79	FALSE	city_20_100	TRUE	average	FALSE	TRUE	TRUE	13	FALSE	67	36	7.785714286	-0.461518589	1.386898957	-0.164214856	[-0.484, 0.387)	[ 0.266, 5.061]	[-0.455, 0.275)	0.218	0.72
f	normal weight	22.70958904	FALSE	FALSE	1	0	4.35	2.48	1.64	38	0.55	4.4	4.7	22.41	0.742268041	131	82	FALSE	city_20_100	TRUE	average	FALSE	TRUE	TRUE	10	FALSE	72	39.9	15.5	0.179074569	0.309487281	0.609685226	[-0.484, 0.387)	[ 0.266, 5.061]	[ 0.275, 5.091]	0.434	0.798
m	obese	23.40547945	FALSE	FALSE	3	1	6	4.29	1.15	19	1.71	4.3	4.8	32.89	0.785714286	163	88	FALSE	city_20_100	TRUE	below_average	FALSE	TRUE	FALSE	7	FALSE	99	8	25.07142857	1.46886336	-1.787694245	-0.48671496	[ 0.387, 3.526]	[-2.114,-0.505)	[-2.656,-0.455)	0.702	0.16
f	normal weight	24.42465753	FALSE	FALSE	0	0	4.78	2.42	2.07	43	1.02	3.9	4.7	18.82	0.719101124	112	77	FALSE	village	FALSE	average	FALSE	FALSE	TRUE	9	FALSE	64	28.8	13.64285714	-1.586288795	-0.001724079	0.85854272	[-2.231,-0.484)	[-0.505, 0.266)	[ 0.275, 5.091]	0.382	0.576
f	normal weight	25.56164384	FALSE	FALSE	1	0	4.83	2.23	2.07	43	1.42	4.5	4.7	23.99	0.682242991	142	84	FALSE	city_below_20	FALSE	below_average	FALSE	FALSE	TRUE	14	FALSE	73	31.4	6.142857143	-0.879881229	-0.071922158	0.656157146	[-2.231,-0.484)	[-0.505, 0.266)	[ 0.275, 5.091]	0.172	0.628
f	normal weight	24.97534247	FALSE	FALSE	0	0	4.57	2.19	1.98	43	0.83	4.7	4.5	23.05	0.714285714	129	78	FALSE	city_over_100	TRUE	average	FALSE	FALSE	TRUE	9	FALSE	70	22.4	3.928571429	-1.337818313	-0.059162865	-0.620439863	[-2.231,-0.484)	[-0.505, 0.266)	[-2.656,-0.455)	0.11	0.448
m	normal weight	35.61643836	TRUE	TRUE	1	0	5.81	4.4	1.52	26	1.02	5.2	4.9	24.78425752	0.947916667	119	81	FALSE	village	FALSE	average	FALSE	FALSE	FALSE	12	FALSE	91	10.7	8.142857143	-0.830302139	-1.021623193	0.339647817	[-2.231,-0.484)	[-2.114,-0.505)	[ 0.275, 5.091]	0.228	0.214
f	obese	22.64657534	FALSE	FALSE	2	1	4.42	2.93	0.94	21	1.34	5	4.8	31.64	0.918181818	141	89	FALSE	village	FALSE	average	FALSE	FALSE	TRUE	9	TRUE	101	30.3	18.21428571	0.834857743	1.245946264	3.16063133	[ 0.387, 3.526]	[ 0.266, 5.061]	[ 0.275, 5.091]	0.51	0.606
m	normal weight	18.25753425	FALSE	FALSE	0	0	4.96	3.11	1.28	26	1.29	4.4	5	23.99	0.752475248	113	69	FALSE	city_20_100	TRUE	above_average	TRUE	FALSE	FALSE	7	FALSE	76	19.9	18.64285714	0.421624232	0.122269787	-0.222633384	[ 0.387, 3.526]	[-0.505, 0.266)	[-0.455, 0.275)	0.522	0.398
f	normal weight	32.22739726	FALSE	TRUE	1	0	4.65	2.87	1.63	35	0.56	4.8	4.8	23.39	0.772277228	140	81	FALSE	city_below_20	FALSE	average	FALSE	TRUE	FALSE	6	FALSE	78	20.6	22.35714286	0.099209911	-0.579305742	2.074933198	[-0.484, 0.387)	[-2.114,-0.505)	[ 0.275, 5.091]	0.626	0.412
m	overweight	34.13972603	TRUE	FALSE	4	1	6.47	3.7	0.84	15	5.76	5	4.9	29.76	0.898148148	153	123	FALSE	city_over_100	TRUE	average	FALSE	FALSE	FALSE	11	FALSE	97	9.9	11.85714286	-0.718207677	-1.184919193	-0.281728149	[-2.231,-0.484)	[-2.114,-0.505)	[-0.455, 0.275)	0.332	0.198
f	normal weight	28.67123288	FALSE	FALSE	1	0	3.95	1.67	2.01	51	0.57	5.1	4.8	19.83	0.701030928	135	92	FALSE	city_below_20	FALSE	below_average	FALSE	TRUE	TRUE	10	FALSE	68	9.8	16.92857143	-0.229800542	-0.388120219	0.482438824	[-0.484, 0.387)	[-0.505, 0.266)	[ 0.275, 5.091]	0.474	0.196
m	overweight	27.18356164	FALSE	FALSE	2	1	3.92	2.39	0.9	23	1.73	4.5	4.8	29.89	0.889776941	125	84	TRUE	city_20_100	TRUE	average	FALSE	FALSE	TRUE	14	FALSE	92.08883333	19.7	11.28571429	-0.562317041	-1.670450464	-0.39502223	[-2.231,-0.484)	[-2.114,-0.505)	[-0.455, 0.275)	0.316	0.394
m	normal weight	27.7369863	FALSE	FALSE	1	0	4.21	2.01	2.03	48	0.59	5.4	4.9	22.12	0.902173913	154	86	FALSE	village	FALSE	average	FALSE	TRUE	TRUE	20	FALSE	83	17	20.28571429	0.262857191	-0.073664728	1.381987766	[-0.484, 0.387)	[-0.505, 0.266)	[ 0.275, 5.091]	0.568	0.34
m	overweight	28.03561644	FALSE	FALSE	1	0	4.28	1.85	1.79	42	2.08	4.6	4.8	26.3	0.97752809	123	73	FALSE	city_over_100	TRUE	above_average	TRUE	FALSE	TRUE	16	FALSE	87	13.3	11.35714286	-0.231767334	-0.612589233	-1.208255451	[-0.484, 0.387)	[-2.114,-0.505)	[-2.656,-0.455)	0.318	0.266
f	normal weight	25.66027397	FALSE	FALSE	0	0	3.74	1.96	1.73	43	0.62	4.2	4.7	19.03	0.774193548	105	73	FALSE	village	FALSE	average	FALSE	TRUE	TRUE	12	FALSE	72	18.1	16.35714286	0.410789813	-0.478871708	3.347883984	[ 0.387, 3.526]	[-0.505, 0.266)	[ 0.275, 5.091]	0.458	0.362
f	normal weight	28.00273973	FALSE	FALSE	0	0	5.01	2.6	2	40	1.06	4.8	5	21.8	0.846153846	79	65	FALSE	city_over_100	TRUE	average	FALSE	TRUE	TRUE	7	FALSE	77	17.1	14.64285714	-0.223150605	0.610961229	-0.241771601	[-0.484, 0.387)	[ 0.266, 5.061]	[-0.455, 0.275)	0.41	0.342
m	overweight	26.54520548	TRUE	FALSE	4	1	7.11	4.7	2.06	29	4.4	5.8	5	29.62962963	1	145	84	TRUE	village	FALSE	average	FALSE	FALSE	FALSE	10	FALSE	100	20.6	24.28571429	0.88300238	-0.268381119	0.693885564	[ 0.387, 3.526]	[-0.505, 0.266)	[ 0.275, 5.091]	0.68	0.412
m	overweight	26.25753425	FALSE	FALSE	2	1	4.47	3.12	1.02	23	0.85	4.7	4.9	25.54	0.857142857	140	76	FALSE	city_over_100	TRUE	average	FALSE	FALSE	TRUE	19	FALSE	78	32.4	23.07142857	-0.282346677	1.356933527	-0.25502886	[-0.484, 0.387)	[ 0.266, 5.061]	[-0.455, 0.275)	0.646	0.648
f	normal weight	25.88767123	FALSE	FALSE	1	0	6.2	3.29	2.51	40	1.13	4.6	5.1	20.64	0.8	140	90	FALSE	city_over_100	TRUE	average	FALSE	FALSE	FALSE	21	FALSE	60	41.7	19.21428571	-0.25060502	1.461499267	-0.381465995	[-0.484, 0.387)	[ 0.266, 5.061]	[-0.455, 0.275)	0.538	0.834
f	normal weight	26.36986301	FALSE	FALSE	0	0	4.6	2.77	1.57	34	0.66	4.3	4.3	18.71	0.744444444	128	62	FALSE	city_over_100	TRUE	below_average	FALSE	FALSE	TRUE	14	FALSE	67	28.4	17.57142857	-0.916227026	0.593141097	0.275331873	[-2.231,-0.484)	[ 0.266, 5.061]	[ 0.275, 5.091]	0.492	0.568
f	normal weight	25.04109589	FALSE	FALSE	0	0	4.53	2.02	2.4	53	0.52	4.7	4.7	20.18	0.989010989	110	68	FALSE	city_over_100	TRUE	above_average	TRUE	FALSE	FALSE	20	TRUE	90	44.6	2.642857143	-2.024595243	3.713477707	0.053325393	[-2.231,-0.484)	[ 0.266, 5.061]	[-0.455, 0.275)	0.074	0.892
f	normal weight	26.14246575	FALSE	FALSE	0	0	3.22	1.54	1.55	48	0.47	4.7	4.7	21.2	0.752475248	110	60	FALSE	city_20_100	TRUE	average	FALSE	FALSE	FALSE	14	FALSE	76	34.2	12.42857143	-1.664700123	0.677879743	0.301002869	[-2.231,-0.484)	[ 0.266, 5.061]	[ 0.275, 5.091]	0.348	0.684
m	normal weight	25.28767123	FALSE	FALSE	0	0	4.55	2.59	1.12	25	1.6	4.8	4.8	24.58	0.878787879	127	66	FALSE	village	FALSE	average	FALSE	FALSE	FALSE	17	FALSE	87	29.2	26.07142857	0.486455447	0.275230472	-0.272466932	[ 0.387, 3.526]	[ 0.266, 5.061]	[-0.455, 0.275)	0.73	0.584
f	normal weight	24.0109589	FALSE	FALSE	0	0	4.67	2.44	1.89	40	0.79	4.9	5	23.88	0.817204301	119	71	FALSE	city_20_100	TRUE	below_average	FALSE	FALSE	TRUE	20	FALSE	76	46	9.428571429	-0.955287898	2.576574402	0.265853802	[-2.231,-0.484)	[ 0.266, 5.061]	[-0.455, 0.275)	0.264	0.92
m	overweight	28.8630137	FALSE	FALSE	0	0	3.46	1.58	1.54	45	0.79	4.2	5	26.02	0.877358491	125	76	FALSE	city_over_100	TRUE	average	FALSE	FALSE	FALSE	9	FALSE	93	11.6	36.71428571	0.739093905	-1.13110617	0.695612631	[ 0.387, 3.526]	[-2.114,-0.505)	[ 0.275, 5.091]	1.028	0.232
f	normal weight	25.47123288	FALSE	FALSE	0	0	2.99	1.04	1.79	60	0.53	4.2	4.7	18.56	0.724137931	116	74	FALSE	city_over_100	TRUE	average	FALSE	FALSE	TRUE	16	FALSE	63	13.5	19.28571429	-1.003993582	-1.072550773	0.570039895	[-2.231,-0.484)	[-2.114,-0.505)	[ 0.275, 5.091]	0.54	0.27
f	normal weight	24.53424658	FALSE	FALSE	0	0	3.65	1.89	1.58	43	0.51	4.4	4.7	20.9	0.864197531	115	69	FALSE	city_over_100	TRUE	average	FALSE	FALSE	TRUE	18	FALSE	70	36.7	9.5	-1.362039326	1.091108791	1.232337534	[-2.231,-0.484)	[ 0.266, 5.061]	[ 0.275, 5.091]	0.266	0.734
m	overweight	26.96986301	TRUE	FALSE	1	0	4.2	2.61	1.31	31	0.92	5.7	5.3	26.5831758	0.969387755	120	68	TRUE	city_20_100	TRUE	average	FALSE	FALSE	FALSE	13	FALSE	95	17.3	16	-0.948859535	0.409406394	0.204592883	[-2.231,-0.484)	[ 0.266, 5.061]	[-0.455, 0.275)	0.448	0.346
m	normal weight	21.71232877	FALSE	FALSE	1	0	3.4	1.93	1.23	36	0.64	5	5	22.55	0.783505155	139	85	FALSE	city_20_100	TRUE	average	FALSE	TRUE	FALSE	4	FALSE	76	11.9	20.71428571	0.022071194	-1.202149389	-0.454283301	[-0.484, 0.387)	[-2.114,-0.505)	[-0.455, 0.275)	0.58	0.238
m	overweight	27.88767123	TRUE	FALSE	0	0	4.1	2.1	1.72	42	0.44	4.1	4.7	25.71	0.881820715	122.054	74.03575	FALSE	city_over_100	TRUE	average	FALSE	FALSE	TRUE	10	FALSE	85.952	20.5	16.14285714	0.571249298	0.831257457	-0.916759793	[ 0.387, 3.526]	[ 0.266, 5.061]	[-2.656,-0.455)	0.452	0.41
m	normal weight	33.23835616	FALSE	FALSE	2	1	5.86	2.9	2.86	49	0.78	4.2	4.9	18.72	0.774193548	133	84	FALSE	city_20_100	TRUE	above_average	TRUE	FALSE	TRUE	15	FALSE	72	22.7	21.5	0.534022905	0.50737639	-0.80102274	[ 0.387, 3.526]	[ 0.266, 5.061]	[-2.656,-0.455)	0.602	0.454
f	normal weight	31.35616438	FALSE	FALSE	0	0	5.53	2.84	2.57	46	0.62	4.8	5.1	17.4	0.694736842	98	68	FALSE	city_over_100	TRUE	average	FALSE	FALSE	TRUE	11	FALSE	66	29	22.57142857	-0.794188713	-0.606480933	0.654089761	[-2.231,-0.484)	[-2.114,-0.505)	[ 0.275, 5.091]	0.632	0.58
f	obese	34.30136986	FALSE	FALSE	2	1	4.89	3.33	1.22	24	1.15	4.2	4.9	30.47	0.931372549	124	91	FALSE	city_20_100	TRUE	average	FALSE	FALSE	FALSE	9	TRUE	95	50.7	17.71428571	0.074607303	1.864543006	2.864544947	[-0.484, 0.387)	[ 0.266, 5.061]	[ 0.275, 5.091]	0.496	1.014
m	normal weight	32.23561644	FALSE	FALSE	0	0	4.32	2.56	1.59	37	0.66	5	4.8	23.72	0.831123383	125.848	75.9612	FALSE	city_over_100	TRUE	average	FALSE	FALSE	TRUE	16	FALSE	81.453	31.6	39.92857143	3.422300067	2.031372965	-0.370609968	[ 0.387, 3.526]	[ 0.266, 5.061]	[-0.455, 0.275)	1.118	0.632
f	normal weight	19.39726027	FALSE	FALSE	0	0	4.35	2.39	1.77	41	0.81	4.2	4.4	18.22	0.611111111	109	60	FALSE	city_over_100	TRUE	above_average	TRUE	TRUE	FALSE	12	FALSE	55	16.2	15.42857143	-0.088359869	-1.063140163	0.096180275	[-0.484, 0.387)	[-2.114,-0.505)	[-0.455, 0.275)	0.432	0.324
m	overweight	34.09589041	FALSE	FALSE	4	1	5.75	3.89	1.03	18	2.05	5	5.2	25.71	0.908424592	140	75	FALSE	city_over_100	TRUE	average	FALSE	FALSE	TRUE	0	FALSE	89.795	23.1	15.57142857	0.280852275	-0.696886274	3.686696611	[-0.484, 0.387)	[-2.114,-0.505)	[ 0.275, 5.091]	0.436	0.462
m	normal weight	27.1369863	TRUE	FALSE	1	0	5.57	3.48	1.93	35	0.59	4.7	5.3	22.55	0.914893617	112	80	FALSE	city_20_100	TRUE	average	FALSE	FALSE	TRUE	11	FALSE	86	19.5	21.35714286	0.937338724	1.256582842	-0.964138893	[ 0.387, 3.526]	[ 0.266, 5.061]	[-2.656,-0.455)	0.598	0.39
f	normal weight	27.20821918	FALSE	FALSE	0	0	5.21	2.69	2.17	42	1.35	4.9	4.8	18.37	0.779069767	110	59	FALSE	city_20_100	TRUE	average	FALSE	TRUE	TRUE	6	FALSE	67	16.2	14.64285714	-0.594909996	0.135143415	-0.403256939	[-2.231,-0.484)	[-0.505, 0.266)	[-0.455, 0.275)	0.41	0.324
m	overweight	33.66027397	TRUE	FALSE	3	1	4.97	3.63	1	20	1.91	5	5	29.05475207	0.899082569	144	90	TRUE	village	FALSE	average	FALSE	FALSE	TRUE	12	FALSE	98	19.1	28.21428571	1.606495258	1.466511101	-1.145130361	[ 0.387, 3.526]	[ 0.266, 5.061]	[-2.656,-0.455)	0.79	0.382
f	normal weight	25.06575342	FALSE	FALSE	0	0	5.3	2.57	2.77	52	0.65	4.9	4.7	19.49	0.806818182	102	72	FALSE	city_20_100	TRUE	above_average	TRUE	TRUE	TRUE	9	FALSE	71	15.9	16.5	0.391357416	-0.378197989	-0.790002435	[ 0.387, 3.526]	[-0.505, 0.266)	[-2.656,-0.455)	0.462	0.318
f	normal weight	19.77260274	FALSE	FALSE	0	0	3.87	2.02	1.77	46	0.59	5	4.9	18.51	0.802631579	119	84	FALSE	city_20_100	TRUE	average	FALSE	FALSE	FALSE	9	FALSE	61	25.9	13.52357143	-0.597583111	0.655891424	0.618097227	[-2.231,-0.484)	[ 0.266, 5.061]	[ 0.275, 5.091]	0.379408	0.518
m	normal weight	30.96438356	FALSE	FALSE	2	1	5.39	3.61	1.51	28	0.94	5	4.5	24.54	0.956989247	134	90	FALSE	city_over_100	TRUE	average	FALSE	FALSE	FALSE	14	FALSE	89	19.7	11.28571429	-0.947371669	-0.32105934	1.455774881	[-2.231,-0.484)	[-0.505, 0.266)	[ 0.275, 5.091]	0.316	0.394
m	normal weight	27.30410959	FALSE	FALSE	1	0	4.57	2.49	1.7	37	1.04	4.7	4.8	20.75	0.813186813	137	89	FALSE	city_over_100	TRUE	average	FALSE	FALSE	TRUE	15	FALSE	74	17.5	16.40814286	0.005981772	0.503531661	-1.370007124	[-0.484, 0.387)	[ 0.266, 5.061]	[-2.656,-0.455)	0.457106	0.35
f	normal weight	22.53424658	FALSE	FALSE	1	0	5.02	2.6	1.71	34	1.76	4.9	5.1	19.49	0.653061224	120	78	FALSE	city_20_100	TRUE	above_average	TRUE	FALSE	FALSE	20	FALSE	64	42.4	4.285714286	-1.399733216	0.174045144	-0.429096579	[-2.231,-0.484)	[-0.505, 0.266)	[-0.455, 0.275)	0.12	0.848
m	normal weight	25.20273973	FALSE	FALSE	0	0	4.1	1.97	1.93	47	0.56	5.3	4.9	16.6	0.817204301	125	76	FALSE	city_20_100	TRUE	average	FALSE	FALSE	FALSE	17	FALSE	76	27	25.85714286	-0.178499076	-0.524969895	0.487312161	[-0.484, 0.387)	[-2.114,-0.505)	[ 0.275, 5.091]	0.724	0.54
f	normal weight	34.64931507	FALSE	TRUE	3	1	6.57	3.65	2.14	33	1.87	5.8	5.1	21.48	0.838709677	128	86	FALSE	city_over_100	TRUE	average	FALSE	FALSE	FALSE	14	FALSE	78	22.6	7.785714286	-0.84001665	-0.980544181	0.865212973	[-2.231,-0.484)	[-2.114,-0.505)	[ 0.275, 5.091]	0.218	0.452
m	normal weight	22.55342466	FALSE	FALSE	1	0	3.94	2.31	1.33	34	0.8	5	4.9	19.79	0.808510638	133	73	TRUE	city_over_100	TRUE	average	FALSE	TRUE	TRUE	6	FALSE	76	21	22.07142857	-0.26414683	0.193626315	-0.275605526	[-0.484, 0.387)	[-0.505, 0.266)	[-0.455, 0.275)	0.618	0.42
m	normal weight	22.29041096	FALSE	FALSE	0	0	4.05	2.44	1.07	26	1.14	4.8	5	22.16	0.762886598	124	71	FALSE	city_20_100	TRUE	above_average	TRUE	FALSE	FALSE	21	FALSE	74	30.7	17	-0.166131855	1.620719868	0.501786049	[-0.484, 0.387)	[ 0.266, 5.061]	[ 0.275, 5.091]	0.476	0.614
f	normal weight	25.59178082	FALSE	FALSE	3	1	4.84	2.36	1.94	40	1.82	5.6	4.7	20.55	0.768421053	134	90	TRUE	city_20_100	TRUE	average	FALSE	TRUE	TRUE	16	FALSE	73	24.1	26.14285714	1.209932906	1.355312067	-0.976098572	[ 0.387, 3.526]	[ 0.266, 5.061]	[-2.656,-0.455)	0.732	0.482
m	overweight	25.58082192	TRUE	TRUE	0	0	3.48	1.95	1.44	44	0.5	4.7	5	26.19618735	0.944444444	125	69	FALSE	city_over_100	TRUE	average	FALSE	FALSE	FALSE	13	FALSE	85	53.8	27.71428571	1.388616746	0.078517017	2.966020857	[ 0.387, 3.526]	[-0.505, 0.266)	[ 0.275, 5.091]	0.776	1.076
m	overweight	28.78630137	TRUE	FALSE	2	1	4.66	2.74	1.13	24	2.22	5.2	4.8	28.02	0.881818182	159	90	TRUE	city_20_100	TRUE	average	FALSE	FALSE	TRUE	13	FALSE	97	14.4	28.14285714	0.989578474	0.414525933	-1.348872155	[ 0.387, 3.526]	[ 0.266, 5.061]	[-2.656,-0.455)	0.788	0.288
f	normal weight	22.30684932	FALSE	TRUE	0	0	2.96	1.27	1.36	46	0.61	4.7	4.5	22.49	0.708737864	125	76	TRUE	city_over_100	TRUE	average	FALSE	TRUE	TRUE	16	FALSE	73	17.2	21.5	-0.218531019	-0.560331066	-1.123417989	[-0.484, 0.387)	[-2.114,-0.505)	[-2.656,-0.455)	0.602	0.344
m	overweight	18.15068493	TRUE	FALSE	0	0	4.37	2.65	1.27	29	1.27	5.3	4.6	29.98	0.897196262	121	67	FALSE	city_20_100	TRUE	average	FALSE	TRUE	FALSE	8	FALSE	96	11.5	23.07142857	-0.122296138	-0.828718027	-0.016710355	[-0.484, 0.387)	[-2.114,-0.505)	[-0.455, 0.275)	0.646	0.23
f	normal weight	19.35616438	FALSE	FALSE	0	0	4.27	2.11	1.84	43	0.99	5.2	4.8377	17.99307958	0.663043478	117	77	FALSE	city_20_100	TRUE	average	FALSE	TRUE	TRUE	11.8658	FALSE	61	14.7559	11.55685714	-0.877147427	-0.528956681	-1.145775559	[-2.231,-0.484)	[-2.114,-0.505)	[-2.656,-0.455)	0.319668	0.293614
f	normal weight	19.96712329	FALSE	TRUE	0	0	4.63	2.84	1.54	33	0.7	5	4.9	17.86	0.693181818	111	74	FALSE	city_20_100	TRUE	average	FALSE	TRUE	FALSE	9	FALSE	61	20.8	18.5	-0.363740004	1.527652699	-1.261157296	[-0.484, 0.387)	[ 0.266, 5.061]	[-2.656,-0.455)	0.518	0.416
m	normal weight	23.46849315	FALSE	FALSE	0	0	4.42	2.79	1.38	31	0.64	5.1	4.8	21.38	0.851485149	113	76	FALSE	city_below_20	FALSE	average	FALSE	FALSE	TRUE	8	FALSE	86	5.3	11.42857143	0.055206355	-1.191397568	-1.261164927	[-0.484, 0.387)	[-2.114,-0.505)	[-2.656,-0.455)	0.32	0.106
m	normal weight	30.38630137	FALSE	FALSE	1	0	5.82	3.63	1.74	30	1.15	4.8	4.9	23.5	0.84	108	69	FALSE	village	FALSE	above_average	TRUE	FALSE	TRUE	14	FALSE	84	14.2	25.78571429	0.09160225	-0.379327872	0.250997133	[-0.484, 0.387)	[-0.505, 0.266)	[-0.455, 0.275)	0.722	0.284
m	normal weight	24.52876712	FALSE	FALSE	1	0	5.04	2.88	1.91	38	0.53	5	4.8	22.2	0.858585859	146	73	TRUE	city_20_100	TRUE	above_average	TRUE	FALSE	FALSE	20	FALSE	85	36.3	23.85714286	2.208613879	1.719144607	-0.287106468	[ 0.387, 3.526]	[ 0.266, 5.061]	[-0.455, 0.275)	0.668	0.726
f	normal weight	21.59178082	FALSE	FALSE	0	0	4.88	2.49	2.14	44	0.88	4.4	4.6	24.77	0.710280374	115	72	TRUE	village	FALSE	average	FALSE	FALSE	TRUE	21	FALSE	76	28.8	21.92857143	-0.596252619	1.020915235	-0.096229236	[-2.231,-0.484)	[ 0.266, 5.061]	[-0.455, 0.275)	0.614	0.576
f	normal weight	35.38356164	FALSE	FALSE	0	0	5.44	2.52	2.64	49	0.9	5.2	4.7	20.96	0.693877551	122	80	TRUE	city_20_100	TRUE	average	FALSE	FALSE	FALSE	21	FALSE	68	17.4	28.21428571	0.208631092	1.210003778	-0.86938566	[-0.484, 0.387)	[ 0.266, 5.061]	[-2.656,-0.455)	0.79	0.348
m	normal weight	27.23013699	TRUE	TRUE	1	0	4.22	2.75	1.27	30	1	5.2	5	22.28259211	0.903225806	133	81	TRUE	city_over_100	TRUE	average	FALSE	TRUE	FALSE	7	FALSE	84	11.2	16.35714286	1.251852516	-0.298255033	0.194021131	[ 0.387, 3.526]	[-0.505, 0.266)	[-0.455, 0.275)	0.458	0.224
m	normal weight	23.20547945	FALSE	FALSE	0	0	3.55	1.41	1.94	55	0.57	5.1	5	19.84	0.855555556	128	79	TRUE	city_over_100	TRUE	below_average	FALSE	TRUE	FALSE	8	FALSE	77	15.2	17.85714286	-1.036157899	-0.626737893	-0.788916422	[-2.231,-0.484)	[-2.114,-0.505)	[-2.656,-0.455)	0.5	0.304
f	overweight	30.78630137	FALSE	FALSE	2	1	4.13	2.59	1.24	30	0.75	4.8	4.6	26.77	0.716981132	124	86	FALSE	city_over_100	TRUE	average	FALSE	FALSE	TRUE	14	FALSE	76	29.5	6.928571429	-1.229390267	-0.27426475	-0.181499792	[-2.231,-0.484)	[-0.505, 0.266)	[-0.455, 0.275)	0.194	0.59
f	normal weight	26.04109589	FALSE	FALSE	0	0	4.98	2.55	2.26	45	0.62	4.2	4.7	22.65	0.731182796	108	72	FALSE	city_over_100	TRUE	average	FALSE	FALSE	TRUE	18	FALSE	68	17.7	31.71428571	1.230345792	0.603387081	0.043652036	[ 0.387, 3.526]	[ 0.266, 5.061]	[-0.455, 0.275)	0.888	0.354
m	normal weight	25.29315068	FALSE	FALSE	0	0	3.99	2.24	1.53	38	0.66	5	4.8	20.24	0.778947368	109	63	FALSE	city_over_100	TRUE	average	FALSE	FALSE	TRUE	7	FALSE	74	12.6	29.92857143	1.504407069	-0.156528597	-0.725129554	[ 0.387, 3.526]	[-0.505, 0.266)	[-2.656,-0.455)	0.838	0.252
f	normal weight	24.4	FALSE	FALSE	1	0	4.33	2.1	1.96	45	0.4	4.5	5	23.23	0.656565657	153	80	FALSE	city_below_20	FALSE	above_average	TRUE	FALSE	TRUE	17	FALSE	65	34.9	13.42857143	-0.976439146	0.517135593	-1.041641665	[-2.231,-0.484)	[ 0.266, 5.061]	[-2.656,-0.455)	0.376	0.698
m	normal weight	24.76164384	FALSE	FALSE	1	0	5.58	3.95	1.33	24	0.58	4.6	4.6	24.69	0.808080808	125	70	FALSE	city_over_100	TRUE	average	FALSE	FALSE	FALSE	20	FALSE	80	21.3	17.64285714	-0.597742439	1.175681294	-1.585702463	[-2.231,-0.484)	[ 0.266, 5.061]	[-2.656,-0.455)	0.494	0.426
m	normal weight	25.63013699	TRUE	FALSE	2	1	5.43	3.58	1.44	27	0.9	5.4	5.2	20.94	0.801980198	145	93	TRUE	city_over_100	TRUE	above_average	TRUE	FALSE	TRUE	11	FALSE	81	29.5	11.71428571	-0.780973261	0.472859367	0.461983011	[-2.231,-0.484)	[ 0.266, 5.061]	[ 0.275, 5.091]	0.328	0.59
f	normal weight	19.61643836	FALSE	FALSE	0	0	4.25	2.16	1.77	42	0.53	4.4	4.6	20.57	0.731182796	123	74	FALSE	city_20_100	TRUE	average	FALSE	FALSE	FALSE	16	FALSE	68	13	12.07142857	-0.617139273	-1.152456868	0.473434456	[-2.231,-0.484)	[-2.114,-0.505)	[ 0.275, 5.091]	0.338	0.26
m	normal weight	22.97808219	FALSE	FALSE	1	0	3.56	1.9	1.29	36	0.87	4.9	4.6	18.38	0.777777778	150	95	FALSE	village	FALSE	average	FALSE	TRUE	FALSE	17	FALSE	70	13.7	22.35714286	0.693090428	-0.894126531	0.426529637	[ 0.387, 3.526]	[-2.114,-0.505)	[ 0.275, 5.091]	0.626	0.274
m	overweight	23.68767123	FALSE	FALSE	1	0	4.02	2.25	1.36	34	0.68	4.9	4.7	25.06	0.805825243	135	75	TRUE	village	FALSE	above_average	TRUE	FALSE	FALSE	19	FALSE	83	12.6	10.28571429	-1.276554887	-0.251241889	-0.272041319	[-2.231,-0.484)	[-0.505, 0.266)	[-0.455, 0.275)	0.288	0.252
m	obese	35.5890411	TRUE	FALSE	2	1	4.76	3.27	1.22	26	1.37	5.9	5.2	31.15315083	0.915254237	135	90	FALSE	village	FALSE	average	FALSE	TRUE	FALSE	10	TRUE	108	19.1	28.64285714	1.663950105	-1.086196469	0.818003024	[ 0.387, 3.526]	[-2.114,-0.505)	[ 0.275, 5.091]	0.802	0.382
m	normal weight	24.05205479	TRUE	FALSE	2	1	5.65	3.54	1.85	33	0.66	4.9	5.1	21.74	0.911111111	134	71	FALSE	city_over_100	TRUE	average	FALSE	FALSE	FALSE	19	FALSE	82	22	16	-0.484460462	0.089643741	-0.101575723	[-0.484, 0.387)	[-0.505, 0.266)	[-0.455, 0.275)	0.448	0.44
f	normal weight	23.36438356	FALSE	FALSE	0	0	4.71	2.31	1.87	40	1.28	4.6	4.8	20.55	0.726315789	124	77	FALSE	city_over_100	TRUE	above_average	TRUE	FALSE	FALSE	18	FALSE	69	18.4	10	-0.995936057	-0.752584382	0.347265938	[-2.231,-0.484)	[-2.114,-0.505)	[ 0.275, 5.091]	0.28	0.368
m	overweight	32.54520548	FALSE	FALSE	2	1	5.78	3.84	1.52	26	0.87	4.6	5	26.42	0.882352941	146	97	FALSE	village	FALSE	average	FALSE	FALSE	TRUE	8	FALSE	90	15.7	22	-0.35255945	-0.852004983	-0.464503262	[-0.484, 0.387)	[-2.114,-0.505)	[-2.656,-0.455)	0.616	0.314
m	overweight	27.73424658	FALSE	FALSE	2	1	5.61	3.89	1.43	25	0.62	5	5	27.44	0.845454545	132	83	FALSE	city_over_100	TRUE	average	FALSE	TRUE	FALSE	18	FALSE	93	12.3	5	-0.818481192	-0.045794484	-1.335676692	[-2.231,-0.484)	[-0.505, 0.266)	[-2.656,-0.455)	0.14	0.246
f	normal weight	25.17808219	FALSE	FALSE	0	0	4.84	2.71	1.75	36	0.71	4.9	4.6	21.19	0.695652174	113	74	FALSE	village	FALSE	average	FALSE	TRUE	TRUE	18	FALSE	64	12.6	16.64285714	0.289863226	-1.45141355	0.205240127	[-0.484, 0.387)	[-2.114,-0.505)	[-0.455, 0.275)	0.466	0.252
m	overweight	34.00547945	FALSE	FALSE	2	1	4.86	2.89	1.31	27	1.59	6.2	5.3	28.01	0.97029703	148	97	FALSE	city_20_100	TRUE	above_average	TRUE	TRUE	FALSE	8	FALSE	98	12.5	17.71428571	1.392824437	-0.574981898	1.275827546	[ 0.387, 3.526]	[-2.114,-0.505)	[ 0.275, 5.091]	0.496	0.25
f	normal weight	33.38630137	FALSE	FALSE	1	0	4.71	2.74	1.51	32	0.92	5.9	5	24.61	0.826530612	109	66	TRUE	city_20_100	TRUE	above_average	TRUE	FALSE	TRUE	8	FALSE	81	25.9	8.928571429	-0.105568662	-0.428389812	0.356079837	[-0.484, 0.387)	[-0.505, 0.266)	[ 0.275, 5.091]	0.25	0.518
m	normal weight	24.56438356	FALSE	FALSE	1	0	5.42	2.77	2.39	44	0.76	4.4	4.7	18.52	0.75	101	60	FALSE	city_over_100	TRUE	average	FALSE	FALSE	FALSE	18	FALSE	66	46.4	23.07142857	0.340647723	3.196585698	-0.421715719	[-0.484, 0.387)	[ 0.266, 5.061]	[-0.455, 0.275)	0.646	0.928
m	normal weight	26.88767123	FALSE	FALSE	0	0	5.07	3.47	1.1	22	0.87	5	4.8	22.89	0.907216495	129	81	FALSE	city_over_100	TRUE	above_average	TRUE	TRUE	FALSE	21	FALSE	88	12.8	14.21428571	-0.943701062	-0.514356675	-1.22645475	[-2.231,-0.484)	[-2.114,-0.505)	[-2.656,-0.455)	0.398	0.256
m	overweight	26.42191781	FALSE	FALSE	3	1	5.98	2.64	1.62	27	4.7	4.9	4.6	25.95	0.990196078	133	91	FALSE	city_over_100	TRUE	above_average	TRUE	TRUE	TRUE	11	FALSE	101	23.8	9.928571429	0.718810543	1.046142127	-2.656422587	[ 0.387, 3.526]	[ 0.266, 5.061]	[-2.656,-0.455)	0.278	0.476
m	overweight	34.10684932	TRUE	FALSE	2	1	5.83	3.7	1.53	26	2.1	5.3	5.1	28.63403944	0.931372549	126	70	FALSE	village	FALSE	average	FALSE	FALSE	TRUE	11	FALSE	95	11.5	28.42857143	0.551535681	0.125417697	0.098444237	[ 0.387, 3.526]	[-0.505, 0.266)	[-0.455, 0.275)	0.796	0.23
f	normal weight	24.80273973	FALSE	FALSE	1	0	4.95	2.58	1.8	36	1.73	4.3	5	23.53	0.6875	120	80	TRUE	city_over_100	TRUE	average	FALSE	TRUE	FALSE	15	FALSE	77	15.3	20.07142857	0.190408671	-1.530545575	-0.24378705	[-0.484, 0.387)	[-2.114,-0.505)	[-0.455, 0.275)	0.562	0.306
f	normal weight	23.97534247	FALSE	FALSE	0	0	4.05	2.11	1.6	40	0.67	4.3	4.8	21.08	0.663157895	124	77	FALSE	village	FALSE	above_average	TRUE	FALSE	TRUE	14	FALSE	63	38.4	3.785714286	-1.935403276	0.005814305	-0.315922085	[-2.231,-0.484)	[-0.505, 0.266)	[-0.455, 0.275)	0.106	0.768
m	obese	31.08767123	FALSE	FALSE	2	1	7.09	5.05	1.38	19	1.4	4.9	4.7	33.21	0.88034188	147	83	FALSE	city_20_100	TRUE	above_average	TRUE	TRUE	TRUE	15	TRUE	103	10.8	11.30407143	-1.114930529	0.113976734	-0.131811829	[-2.231,-0.484)	[-0.505, 0.266)	[-0.455, 0.275)	0.319416	0.216
f	overweight	22.94520548	TRUE	FALSE	0	0	4.15	2.31	1.46	35	0.61	4	4.6	28.39	0.723214286	116	79	FALSE	city_over_100	TRUE	average	FALSE	FALSE	TRUE	12	FALSE	81	24.5	16	-1.33313567	1.563601979	0.504950452	[-2.231,-0.484)	[ 0.266, 5.061]	[ 0.275, 5.091]	0.448	0.49
f	normal weight	34.84109589	FALSE	FALSE	1	0	4.28	1.74	1.96	46	1.33	4.9	4.8	24.09	0.86	139	90	TRUE	city_over_100	TRUE	average	FALSE	FALSE	TRUE	7	FALSE	86	12	30.92857143	2.070011759	-0.442657565	-1.068664601	[ 0.387, 3.526]	[-0.505, 0.266)	[-2.656,-0.455)	0.866	0.24
f	normal weight	23.66849315	FALSE	FALSE	0	0	4.42	2.09	2.09	47	0.55	4.8	4.8	19.72	0.66	118	73	FALSE	village	FALSE	above_average	TRUE	FALSE	TRUE	15	FALSE	66	11.2	12.85714286	-1.184257911	-0.527228863	-0.261406382	[-2.231,-0.484)	[-2.114,-0.505)	[-0.455, 0.275)	0.36	0.224
f	overweight	25.98630137	FALSE	FALSE	1	0	4.96	2.77	1.87	38	0.77	5.5	5	25.64	0.868686869	136	86	FALSE	city_below_20	FALSE	above_average	TRUE	FALSE	FALSE	12	FALSE	86	12.3	16.64285714	0.047920242	-0.121190995	-0.389003544	[-0.484, 0.387)	[-0.505, 0.266)	[-0.455, 0.275)	0.466	0.246
m	normal weight	30.95068493	FALSE	FALSE	2	1	5.38	3.43	1.7	32	0.58	5	5	24.69	0.75	121	87	FALSE	city_over_100	TRUE	average	FALSE	FALSE	TRUE	12	FALSE	78	21.6	22.85714286	-0.045352242	-0.104267012	1.69777727	[-0.484, 0.387)	[-0.505, 0.266)	[ 0.275, 5.091]	0.64	0.432
m	normal weight	27.3369863	FALSE	FALSE	2	1	5.24	3.16	1.54	29	1.12	4.7	4.9	23.99	0.89	150	90	FALSE	city_over_100	TRUE	above_average	TRUE	FALSE	TRUE	12	FALSE	89	26.3	26.42857143	1.084357698	2.205823866	0.131011806	[ 0.387, 3.526]	[ 0.266, 5.061]	[-0.455, 0.275)	0.74	0.526
m	normal weight	26.41643836	FALSE	FALSE	1	0	3.24	1.58	1.48	46	0.58	4.8	4.3	20.67	0.760416667	137	73	FALSE	city_over_100	TRUE	average	FALSE	FALSE	TRUE	16	FALSE	73	27.5	3.785714286	-1.592772411	-0.391515122	1.467386302	[-2.231,-0.484)	[-0.505, 0.266)	[ 0.275, 5.091]	0.106	0.55
m	overweight	32.75068493	FALSE	FALSE	2	1	4.47	3.44	0.95	21	1.15	4.3	5.2	27.32	0.924528302	138	71	FALSE	city_20_100	TRUE	above_average	TRUE	TRUE	TRUE	15	FALSE	98	26.9	18.42857143	0.318998834	-0.804744576	1.91215547	[-0.484, 0.387)	[-2.114,-0.505)	[ 0.275, 5.091]	0.516	0.538
m	overweight	32.22191781	TRUE	FALSE	1	0	4.5	2.8	1.7	38	0.79	5.3	4.8	26.4915082	1	136	92	FALSE	village	FALSE	average	FALSE	TRUE	TRUE	6	FALSE	87	26.6	14.07142857	0.598803778	-0.014889601	0.602469867	[ 0.387, 3.526]	[-0.505, 0.266)	[ 0.275, 5.091]	0.394	0.532
f	obese	28.01369863	FALSE	FALSE	3	1	4.82	3.32	1.03	21	1.16	5.7	5.3	34.41	0.936363636	140	92	TRUE	city_over_100	TRUE	average	FALSE	TRUE	TRUE	7	TRUE	103	15.5	12.28571429	-1.067558899	0.631678775	-0.717216609	[-2.231,-0.484)	[ 0.266, 5.061]	[-2.656,-0.455)	0.344	0.31
m	normal weight	26.12876712	FALSE	FALSE	1	0	6.34	4.4	1.47	23	1.1	4.8	4.6	21.91	0.824175824	127	80	FALSE	city_over_100	TRUE	average	FALSE	FALSE	TRUE	11	FALSE	75	22.1	23.57142857	-0.058423189	0.151179188	-0.281172607	[-0.484, 0.387)	[-0.505, 0.266)	[-0.455, 0.275)	0.66	0.442
f	normal weight	22.50684932	FALSE	FALSE	1	0	6.39	3.57	2.29	36	1.36	4.7	4.8	18.81	0.692307692	121	93	FALSE	city_over_100	TRUE	average	FALSE	FALSE	TRUE	13	FALSE	63	31.6	17.64285714	-0.02880614	0.098811829	3.19232746	[-0.484, 0.387)	[-0.505, 0.266)	[ 0.275, 5.091]	0.494	0.632
m	obese	28.77260274	TRUE	FALSE	2	1	4.75	3.08	1.03	22	1.29	4.4	5	37.18	1	157	104	TRUE	city_over_100	TRUE	average	FALSE	FALSE	TRUE	14	TRUE	118	22	8.142857143	-0.692605453	0.289225612	-0.465840001	[-2.231,-0.484)	[ 0.266, 5.061]	[-2.656,-0.455)	0.228	0.44
m	normal weight	24.39178082	FALSE	FALSE	1	0	4.2	2.35	1.38	33	0.82	4.6	4.5	20.45	0.806122449	138	93	FALSE	village	FALSE	below_average	FALSE	FALSE	TRUE	14	FALSE	79	15.1	28.71428571	0.337439353	-1.053097279	0.360612009	[-0.484, 0.387)	[-2.114,-0.505)	[ 0.275, 5.091]	0.804	0.302
f	overweight	23.55342466	FALSE	FALSE	1	0	3.78	2	1.13	30	1.22	4.5	5.2	25.39	0.698113208	123	78	FALSE	village	FALSE	above_average	TRUE	TRUE	TRUE	15	FALSE	74	24.4	21	-0.113659515	0.351587935	0.093432542	[-0.484, 0.387)	[ 0.266, 5.061]	[-0.455, 0.275)	0.588	0.488
f	normal weight	24.97808219	FALSE	FALSE	1	0	4.91	2.66	1.66	34	1.06	4.7	4.5	22.1	0.712765957	131	83	TRUE	city_over_100	TRUE	above_average	TRUE	FALSE	TRUE	19	FALSE	67	40.9	16.78571429	0.219228506	0.938443389	-0.252061031	[-0.484, 0.387)	[ 0.266, 5.061]	[-0.455, 0.275)	0.47	0.818
m	overweight	26.5890411	FALSE	FALSE	2	1	5.43	3.8	1.03	19	0.79	5	5	27.41	0.819047619	125	77	FALSE	city_20_100	TRUE	average	FALSE	FALSE	TRUE	9	FALSE	86	9	17.71428571	0.271866271	-0.695621873	-0.614267314	[-0.484, 0.387)	[-2.114,-0.505)	[-2.656,-0.455)	0.496	0.18
m	normal weight	27.04657534	FALSE	FALSE	1	0	4.89	2.87	1.77	36	0.6	5	5	20.52	0.818181818	138	74	FALSE	city_over_100	TRUE	average	FALSE	TRUE	FALSE	11	FALSE	72	14.2	7.357142857	-1.392401203	-0.587472349	-1.086238702	[-2.231,-0.484)	[-2.114,-0.505)	[-2.656,-0.455)	0.206	0.284
f	normal weight	32.76164384	FALSE	FALSE	0	0	5.87	3.44	1.99	34	0.84	4.7	4.8	19.33	0.747126437	126	77	FALSE	city_below_20	FALSE	average	FALSE	FALSE	FALSE	11	FALSE	65	32.5	9.357142857	-1.46472719	1.649703695	-1.264982077	[-2.231,-0.484)	[ 0.266, 5.061]	[-2.656,-0.455)	0.262	0.65
f	obese	33.91780822	TRUE	FALSE	1	0	3.52	2.17	1.18	34	0.92	4.9	4.6	33.46222487	0.887850467	117	64	TRUE	village	FALSE	average	FALSE	FALSE	FALSE	14	TRUE	95	16.7	11.42857143	-0.791069516	-0.960752545	-0.150098682	[-2.231,-0.484)	[-2.114,-0.505)	[-0.455, 0.275)	0.32	0.334
m	normal weight	26.3890411	TRUE	FALSE	1	0	4.29	2.57	1.39	32	0.58	4.7	4.8	24.19	0.766990291	145	93	FALSE	village	FALSE	average	FALSE	FALSE	TRUE	9	FALSE	79	14.2	17.42857143	-0.694006971	-0.731594834	-0.197849798	[-2.231,-0.484)	[-2.114,-0.505)	[-0.455, 0.275)	0.488	0.284
m	normal weight	26.3890411	TRUE	FALSE	1	0	3.59	1.98	1.34	37	0.46	5.3	4.8	24.69	0.754716981	134	94	FALSE	village	FALSE	average	FALSE	FALSE	TRUE	9	FALSE	80	21.4	18.21428571	0.49088061	0.284350673	-0.038655029	[ 0.387, 3.526]	[ 0.266, 5.061]	[-0.455, 0.275)	0.51	0.428
f	normal weight	22.61369863	FALSE	FALSE	0	0	5.3	3.17	1.79	34	0.62	5	4.8	19.53	0.788235294	125	60	FALSE	city_over_100	TRUE	average	FALSE	FALSE	FALSE	17	FALSE	67	29.6	7.642857143	-1.166633894	0.139026764	0.378825386	[-2.231,-0.484)	[-0.505, 0.266)	[ 0.275, 5.091]	0.214	0.592
f	overweight	31.82465753	FALSE	FALSE	1	0	4.55	2.57	1.67	37	0.81	5.1	4.5	26.76	0.833333333	129	86	FALSE	city_over_100	TRUE	average	FALSE	FALSE	TRUE	15	FALSE	85	37.4	9	-1.330426357	1.683595414	0.395608715	[-2.231,-0.484)	[ 0.266, 5.061]	[ 0.275, 5.091]	0.252	0.748
m	normal weight	27.96164384	FALSE	FALSE	3	1	7.21	5.06	1.26	17	1.96	5	5.3	24.21	0.955555556	130	80	TRUE	city_below_20	FALSE	average	FALSE	TRUE	FALSE	9	FALSE	86	15.2	22	0.269622124	-0.704755433	0.086591225	[-0.484, 0.387)	[-2.114,-0.505)	[-0.455, 0.275)	0.616	0.304
f	normal weight	19.24931507	FALSE	FALSE	1	0	4.5	2.47	1.8	40	0.51	4.9	5	18.82	0.839506173	135	87	FALSE	city_over_100	TRUE	below_average	FALSE	FALSE	FALSE	14	FALSE	68	23.1	4.714285714	-1.417966427	1.536568155	0.209359993	[-2.231,-0.484)	[ 0.266, 5.061]	[-0.455, 0.275)	0.132	0.462
f	normal weight	19.19726027	FALSE	FALSE	0	0	4.48	2.58	1.58	35	0.7	5	5	20.7	0.875	114	73	FALSE	city_below_20	FALSE	average	FALSE	FALSE	FALSE	10	FALSE	63	14.5	2.714285714	-1.597341972	0.61830414	-0.036749112	[-2.231,-0.484)	[ 0.266, 5.061]	[-0.455, 0.275)	0.076	0.29
f	normal weight	30.8	FALSE	FALSE	1	0	5.17	2.51	2.21	43	0.99	4.6	5.2	23.41	0.795698925	130	90	FALSE	city_over_100	TRUE	average	FALSE	FALSE	TRUE	16	FALSE	74	19.1	7.857142857	-1.099569338	-0.079626529	0.701859925	[-2.231,-0.484)	[-0.505, 0.266)	[ 0.275, 5.091]	0.22	0.382
m	overweight	30.89315068	FALSE	FALSE	1	0	4.78	3.05	1.38	29	0.77	4.8	5.2	25.08	0.92	130	80	FALSE	city_over_100	TRUE	average	FALSE	TRUE	TRUE	18	FALSE	92	22.6	14.21428571	0.339182855	-0.413683503	1.167284483	[-0.484, 0.387)	[-0.505, 0.266)	[ 0.275, 5.091]	0.398	0.452
m	overweight	24.77808219	FALSE	FALSE	3	1	9.17	6.78	1.49	16	1.97	4.3	5.3	26.22	0.818181818	127	90	FALSE	city_over_100	TRUE	average	FALSE	FALSE	TRUE	10	FALSE	72	19.6	23.64285714	1.182476623	-0.191990246	0.616814618	[ 0.387, 3.526]	[-0.505, 0.266)	[ 0.275, 5.091]	0.662	0.392
m	normal weight	26.84657534	TRUE	FALSE	2	1	4.52	2.46	1.79	40	0.78	5.6	4.7	20.81165453	1.078125	131	71	FALSE	city_over_100	TRUE	average	FALSE	FALSE	TRUE	11	FALSE	69	45	22.85714286	-0.475966987	-0.506526558	1.336753796	[-0.484, 0.387)	[-2.114,-0.505)	[ 0.275, 5.091]	0.64	0.9
m	normal weight	30.78356164	FALSE	FALSE	1	0	6.14	3.88	1.99	32	0.59	5.2	5.5	19.37	0.904761905	105	60	FALSE	city_below_20	FALSE	above_average	TRUE	FALSE	FALSE	7	FALSE	76	18.7	19.28571429	0.573447721	-1.543405342	-0.191296527	[ 0.387, 3.526]	[-2.114,-0.505)	[-0.455, 0.275)	0.54	0.374
f	normal weight	27.64657534	FALSE	FALSE	0	0	5.44	3.05	2.1	39	0.64	4.7	4.8	23.23	0.870588235	110	70	TRUE	city_over_100	TRUE	average	FALSE	FALSE	TRUE	16	FALSE	74	36.9	12.78571429	-0.825505354	0.114927833	1.442532673	[-2.231,-0.484)	[-0.505, 0.266)	[ 0.275, 5.091]	0.358	0.738
f	overweight	29.45753425	FALSE	TRUE	2	1	4.85	3.07	1.4	29	0.84	5.7	5.2	29.07	0.884615385	130	65	FALSE	city_over_100	TRUE	average	FALSE	TRUE	TRUE	14	TRUE	92	15.6	16.42857143	0.254708643	-0.33417072	0.201040044	[-0.484, 0.387)	[-0.505, 0.266)	[-0.455, 0.275)	0.46	0.312
m	normal weight	31.8	FALSE	FALSE	1	0	6.4	4.43	1.53	24	0.96	5.2	5.2	23.18	0.947916667	128	80	FALSE	city_over_100	TRUE	average	FALSE	TRUE	TRUE	18	FALSE	91	9.4	20.21428571	-0.142914988	-1.381438644	0.170306911	[-0.484, 0.387)	[-2.114,-0.505)	[-0.455, 0.275)	0.566	0.188
f	normal weight	28.82191781	FALSE	FALSE	0	0	4.17	2.05	1.78	43	0.75	4.9	5	22.82	0.730769231	105	75	FALSE	city_over_100	TRUE	above_average	TRUE	TRUE	TRUE	14	FALSE	76	17	10.57142857	-0.560875628	-0.422389668	0.122526196	[-2.231,-0.484)	[-0.505, 0.266)	[-0.455, 0.275)	0.296	0.34
m	overweight	30.10684932	TRUE	FALSE	3	1	7.75	4.86	1.28	17	3.55	5.3	5.3	27.77	0.927083333	140	90	TRUE	city_over_100	TRUE	average	FALSE	FALSE	FALSE	10	FALSE	89	40.9	23.85714286	-0.509158207	0.635558159	-1.713233374	[-2.231,-0.484)	[ 0.266, 5.061]	[-2.656,-0.455)	0.668	0.818
f	normal weight	25.73424658	FALSE	FALSE	0	0	6.8	4.02	2.41	35	0.81	4.8	5	21.19	0.744444444	123	70	FALSE	city_over_100	TRUE	average	FALSE	TRUE	FALSE	13	FALSE	67	14.4	35.07142857	0.243425379	-0.113800739	-0.120058954	[-0.484, 0.387)	[-0.505, 0.266)	[-0.455, 0.275)	0.982	0.288
f	normal weight	22.01643836	FALSE	FALSE	0	0	3.71	2.04	1.34	36	0.73	4.4	4.4	15.62	0.853333333	120	76	TRUE	city_below_20	FALSE	average	FALSE	TRUE	FALSE	16	FALSE	64	14.1	14.35714286	-0.215605328	-1.515078135	-0.298538371	[-0.484, 0.387)	[-2.114,-0.505)	[-0.455, 0.275)	0.402	0.282
f	normal weight	22.16164384	FALSE	FALSE	0	0	4.66	2.71	1.54	33	0.91	5	5.1	19.27	0.825	116	76	TRUE	city_below_20	FALSE	average	FALSE	TRUE	FALSE	6	FALSE	66	9.8	30.92857143	1.576281956	-0.696475204	1.139967732	[ 0.387, 3.526]	[-2.114,-0.505)	[ 0.275, 5.091]	0.866	0.196
m	overweight	24.70958904	FALSE	FALSE	1	0	3.31	1.71	1.32	40	0.62	4.5	5.1	25.96	0.82	132	57	FALSE	city_over_100	TRUE	average	FALSE	FALSE	TRUE	17	FALSE	82	13.7	26.92857143	-0.17434277	-0.62145262	0.448743286	[-0.484, 0.387)	[-2.114,-0.505)	[ 0.275, 5.091]	0.754	0.274
f	overweight	31.42465753	TRUE	FALSE	1	0	4.76	2.57	2.07	43	0.67	5.3	5	26.57312925	0.792079208	140	90	FALSE	city_20_100	TRUE	above_average	TRUE	FALSE	TRUE	10	FALSE	80	29.2	7.928571429	-1.774873587	-0.26223262	-0.745394641	[-2.231,-0.484)	[-0.505, 0.266)	[-2.656,-0.455)	0.222	0.584
m	overweight	27.54520548	FALSE	FALSE	1	0	4.78	2.2	1.31	27	2.8	5.2	5.1	29.75	0.917276773	110	70	FALSE	city_over_100	TRUE	average	FALSE	FALSE	TRUE	17	FALSE	92.6525	43.5	16.78571429	0.329983284	1.62399495	3.263208086	[-0.484, 0.387)	[ 0.266, 5.061]	[ 0.275, 5.091]	0.47	0.87
f	overweight	34.15068493	FALSE	FALSE	0	0	5.72	3.59	1.84	32	0.64	5	4.8	28.91	0.92	114	72	FALSE	city_over_100	TRUE	average	FALSE	FALSE	FALSE	10	TRUE	92	21.9	13.64285714	-0.405651098	-1.017972799	0.329922357	[-0.484, 0.387)	[-2.114,-0.505)	[ 0.275, 5.091]	0.382	0.438
m	overweight	31.1890411	TRUE	TRUE	3	1	10.33	5.74	1.26	12	4.81	5.3	5.4	25.42	0.896226415	130	80	FALSE	city_over_100	TRUE	above_average	TRUE	FALSE	TRUE	13	FALSE	95	23.4	31.28571429	3.060200306	1.425137448	0.561235723	[ 0.387, 3.526]	[ 0.266, 5.061]	[ 0.275, 5.091]	0.876	0.468
f	normal weight	27.85205479	FALSE	FALSE	1	0	5.02	1.89	2.58	51	1.21	4.6	5.2	14.69	0.783783784	130	80	FALSE	city_over_100	TRUE	above_average	TRUE	TRUE	TRUE	13	FALSE	58	23.4	11.78571429	-0.493714501	-0.280046515	-1.122232216	[-2.231,-0.484)	[-0.505, 0.266)	[-2.656,-0.455)	0.33	0.468
f	normal weight	30.41917808	FALSE	FALSE	1	0	4.97	2.93	1.7	34	0.75	4.7	5.1	20.05	0.793103448	115	85	FALSE	city_over_100	TRUE	average	FALSE	FALSE	TRUE	21	FALSE	69	29.4	15.21428571	-0.771609166	-0.061279153	0.760030232	[-2.231,-0.484)	[-0.505, 0.266)	[ 0.275, 5.091]	0.426	0.588
f	normal weight	26.41369863	TRUE	FALSE	0	0	3.21	1.41	1.53	48	0.59	4.7	4.8	22.31	0.705263158	110	67	FALSE	city_20_100	TRUE	average	FALSE	FALSE	TRUE	19	FALSE	67	36.7	3.928571429	-2.062827459	2.208437776	0.157504341	[-2.231,-0.484)	[ 0.266, 5.061]	[-0.455, 0.275)	0.11	0.734
m	normal weight	30.21369863	FALSE	FALSE	1	0	5.92	4.19	1.37	23	0.8	4.2	4.6	18.59	0.875	120	69	FALSE	city_over_100	TRUE	above_average	TRUE	FALSE	TRUE	15	FALSE	77	7.6	16.55571429	-0.151576105	-1.348482749	-0.035384618	[-0.484, 0.387)	[-2.114,-0.505)	[-0.455, 0.275)	0.466056	0.152
f	normal weight	22.77260274	FALSE	FALSE	1	0	4.55	2.51	1.64	36	0.88	4	4.9	20.07	0.709677419	139	83	FALSE	city_over_100	TRUE	average	FALSE	FALSE	FALSE	13	FALSE	66	30.6	12.35714286	-1.267544062	1.49639255	0.763220423	[-2.231,-0.484)	[ 0.266, 5.061]	[ 0.275, 5.091]	0.346	0.612
f	normal weight	23.28493151	FALSE	FALSE	1	0	4.39	2.57	1.57	36	0.55	4.7	4.6	15.06	0.675	130	76	FALSE	city_over_100	TRUE	average	FALSE	FALSE	FALSE	16	FALSE	54	12.4	15.71428571	0.119757094	-0.185354752	-1.068745476	[-0.484, 0.387)	[-0.505, 0.266)	[-2.656,-0.455)	0.44	0.248
m	overweight	33.36438356	FALSE	TRUE	1	0	5.71	4.01	1.2	21	1.09	4.2	4.9	29.39	0.880733945	128	83	TRUE	city_over_100	TRUE	average	FALSE	FALSE	TRUE	12	FALSE	96	14.9	16.28571429	-1.028410159	-1.028068691	-0.725539737	[-2.231,-0.484)	[-2.114,-0.505)	[-2.656,-0.455)	0.456	0.298
m	overweight	28.32876712	TRUE	FALSE	3	1	4.85	3.09	1.08	22	2	5.6	5	27.4716889	0.90625	130	70	FALSE	city_20_100	TRUE	average	FALSE	FALSE	TRUE	9	FALSE	87	15.9	12.78571429	0.108384986	-0.863577938	-0.182508851	[-0.484, 0.387)	[-2.114,-0.505)	[-0.455, 0.275)	0.358	0.318
m	normal weight	34.91780822	FALSE	TRUE	1	0	5.82	3.67	1.62	28	1.17	4.4	5.1	22.15	0.868131868	109	78	FALSE	city_over_100	TRUE	above_average	TRUE	FALSE	TRUE	14	FALSE	79	19.2	20.85714286	0.900616971	0.345058334	0.463439639	[ 0.387, 3.526]	[ 0.266, 5.061]	[ 0.275, 5.091]	0.584	0.384
m	obese	34.96438356	FALSE	TRUE	3	1	6.89	4.28	1.32	19	2.84	5.2	5	31.67	1.019047619	168	99	FALSE	city_over_100	TRUE	above_average	TRUE	TRUE	FALSE	13	TRUE	107	14.8	23.64285714	1.282064596	0.148258507	-0.732813383	[ 0.387, 3.526]	[-0.505, 0.266)	[-2.656,-0.455)	0.662	0.296
m	overweight	34.23287671	TRUE	FALSE	3	1	5.65	3	2.45	43	0.45	5.8	4.8	26.47	0.807692308	149	92	FALSE	city_20_100	TRUE	above_average	TRUE	FALSE	TRUE	20	FALSE	84	8.4	24.14285714	0.135118218	-0.283282701	-0.418747158	[-0.484, 0.387)	[-0.505, 0.266)	[-0.455, 0.275)	0.676	0.168
f	normal weight	22.71232877	FALSE	FALSE	0	0	5.8	3.2	2.16	37	0.96	4.9	5.1	18.47	0.858823529	95	55	FALSE	city_over_100	TRUE	above_average	TRUE	FALSE	TRUE	15	FALSE	73	17	12.57142857	0.164339402	-0.602484669	0.55099807	[-0.484, 0.387)	[-2.114,-0.505)	[ 0.275, 5.091]	0.352	0.34
f	normal weight	27.07945205	TRUE	FALSE	0	0	4.82	3.09	1.44	30	0.63	4.7	4.5	24.34	0.695238095	128	79	FALSE	city_over_100	TRUE	above_average	TRUE	TRUE	TRUE	11	FALSE	73	43.7	17	-0.336149541	0.803500434	0.830369506	[-0.484, 0.387)	[ 0.266, 5.061]	[ 0.275, 5.091]	0.476	0.874
m	overweight	26.8109589	FALSE	FALSE	1	0	4.53	2.82	1.38	30	0.72	4.7	4.7	26.29	0.893203883	136	83	FALSE	city_over_100	TRUE	average	FALSE	TRUE	TRUE	13	FALSE	92	36.3	25.35714286	-1.01017178	0.113868465	0.528268794	[-2.231,-0.484)	[-0.505, 0.266)	[ 0.275, 5.091]	0.71	0.726
m		18.04931507	FALSE	FALSE	1	0	4.18	2.41	1.49	36	0.61	5.5	4.9	24.91650512	0.81	140	84	FALSE	village	FALSE	average	FALSE	FALSE	FALSE	6	FALSE	81	7.6	22.73685714	0.464445335	0.812503231	-1.652838176	[ 0.387, 3.526]	[ 0.266, 5.061]	[-2.656,-0.455)	0.635838	0.152
m	normal weight	22.5890411	FALSE	FALSE	0	0	3.92	1.65	2.01	51	0.57	4.6	5.4	19.58	0.776595745	108	64	FALSE	city_over_100	TRUE	above_average	TRUE	TRUE	TRUE	13	FALSE	73	14	15.14285714	0.573184048	0.560296484	-0.296034063	[ 0.387, 3.526]	[ 0.266, 5.061]	[-0.455, 0.275)	0.424	0.28
m	normal weight	21.88219178	FALSE	FALSE	0	0	4.56	2.95	1.11	24	1.09	4.7	4.9	22.16	0.803921569	126	79	TRUE	city_20_100	TRUE	average	FALSE	FALSE	FALSE	13	FALSE	82	8.3	10.5	-0.371508642	-0.7789473	-1.140823098	[-0.484, 0.387)	[-2.114,-0.505)	[-2.656,-0.455)	0.294	0.166
f	normal weight	19.81369863	FALSE	FALSE	0	0	5.7	3.49	1.92	34	0.63	4.6	4.5	16.9	0.728395062	101	65	FALSE	city_20_100	TRUE	average	FALSE	TRUE	FALSE	12	FALSE	59	15	14.57142857	0.440563098	-0.313706239	0.565398076	[ 0.387, 3.526]	[-0.505, 0.266)	[ 0.275, 5.091]	0.408	0.3
m	overweight	30.85479452	TRUE	FALSE	2	1	7.16	5.16	1.69	24	1.27	5.6	5.4	27.46928166	0.91	120	70	TRUE	city_below_20	FALSE	average	FALSE	TRUE	FALSE	6	FALSE	91	19.6	38.92857143	1.338348897	0.258779089	-1.06035636	[ 0.387, 3.526]	[-0.505, 0.266)	[-2.656,-0.455)	1.09	0.392
f	normal weight	29.67945205	FALSE	FALSE	0	0	5.18	2.62	2.2	42	0.79	4.7	4.8	20.86	0.733333333	124	76	FALSE	city_over_100	TRUE	average	FALSE	TRUE	TRUE	15	FALSE	66	19.1	14.71428571	0.555230352	0.241038702	-1.107714888	[ 0.387, 3.526]	[-0.505, 0.266)	[-2.656,-0.455)	0.412	0.382
f	normal weight	34.36164384	TRUE	FALSE	1	0	5.57	1.62	3.35	60	1.33	4	4.6	21.87	0.731182796	123	89	TRUE	city_20_100	TRUE	above_average	TRUE	FALSE	TRUE	18	FALSE	68	15.2	11	-0.598825315	-0.034671848	-1.183455383	[-2.231,-0.484)	[-0.505, 0.266)	[-2.656,-0.455)	0.308	0.304
m	overweight	30.56438356	FALSE	FALSE	2	1	5.87	3.81	1.52	26	1.19	4.9	5	27.73	0.905660377	141	90	FALSE	city_over_100	TRUE	average	FALSE	FALSE	TRUE	16	FALSE	96	24.1	27.5	1.412560113	1.650012142	-1.529210077	[ 0.387, 3.526]	[ 0.266, 5.061]	[-2.656,-0.455)	0.77	0.482
f	normal weight	33.52328767	FALSE	FALSE	0	0	5.18	3.09	1.78	34	0.69	4.6	4.8	24.39	0.725490196	116	68	FALSE	city_below_20	FALSE	average	FALSE	FALSE	TRUE	15	FALSE	74	32	23.92857143	0.341428104	0.568936042	0.515139874	[-0.484, 0.387)	[ 0.266, 5.061]	[ 0.275, 5.091]	0.67	0.64
f	normal weight	32.1369863	TRUE	TRUE	0	0	5.68	3.2	2.09	37	0.86	4.9	4.9	20.32	0.6875	118	78	FALSE	city_20_100	TRUE	average	FALSE	TRUE	TRUE	13	FALSE	66	36	15.85714286	-1.072646973	0.596361526	0.314862252	[-2.231,-0.484)	[ 0.266, 5.061]	[ 0.275, 5.091]	0.444	0.72
m	overweight	22.64109589	FALSE	FALSE	0	0	4.38	2.29	1.83	42	0.57	5	4.6	27.77777778	0.956521739	120.849	73.218	FALSE	city_over_100	TRUE	average	FALSE	FALSE	FALSE	13	FALSE	88	17	12.57142857	-1.227517617	-0.405553667	-0.974142605	[-2.231,-0.484)	[-0.505, 0.266)	[-2.656,-0.455)	0.352	0.34
f	normal weight	27.6	FALSE	FALSE	0	0	6.94	2.86	3.54	51	1.18	4.5	4.3	22.27	0.722222222	110	59	FALSE	city_over_100	TRUE	average	FALSE	FALSE	TRUE	15	FALSE	65	33.5	6.714285714	-1.113005395	1.469854872	-0.273696577	[-2.231,-0.484)	[ 0.266, 5.061]	[-0.455, 0.275)	0.188	0.67
m	overweight	28.09863014	FALSE	FALSE	4	1	5.99	3.23	1.06	18	3.75	5.8	5.5	26.88	0.880733945	135	85	FALSE	city_over_100	TRUE	above_average	TRUE	FALSE	TRUE	16	FALSE	96	18.4	16.71428571	0.699802283	-0.589937162	0.044867341	[ 0.387, 3.526]	[-2.114,-0.505)	[-0.455, 0.275)	0.468	0.368
m	normal weight	23.35068493	FALSE	FALSE	0	0	4.87	2.49	1.98	41	0.89	5.4	5.2	19.6	0.793814433	127	82	FALSE	city_over_100	TRUE	average	FALSE	TRUE	FALSE	6	FALSE	77	15.4	47.64285714	2.640810247	-0.54352985	-0.973684495	[ 0.387, 3.526]	[-2.114,-0.505)	[-2.656,-0.455)	1.334	0.308
f	normal weight	24.67671233	FALSE	FALSE	1	0	5	2.86	1.76	35	2.86	5	4.7	20.66	0.709677419	123	72	FALSE	city_over_100	TRUE	below_average	FALSE	FALSE	FALSE	15	FALSE	66	9.8	10.28571429	-1.022899686	-1.17065817	-0.777187483	[-2.231,-0.484)	[-2.114,-0.505)	[-2.656,-0.455)	0.288	0.196
m	obese	32.84657534	TRUE	FALSE	2	1	7.03	5.32	1.3	18	1	5.2	5.4	31.56167151	0.980769231	130	80	TRUE	village	FALSE	above_average	TRUE	FALSE	TRUE	11	TRUE	102	12.6	33.07142857	1.789326872	0.278268873	-1.577981168	[ 0.387, 3.526]	[ 0.266, 5.061]	[-2.656,-0.455)	0.926	0.252
m	normal weight	33.08219178	FALSE	FALSE	0	0	4.52	2.56	1.56	35	0.88	4.4	4.8	22.59	0.852631579	128	81	FALSE	city_over_100	TRUE	above_average	TRUE	FALSE	TRUE	9	FALSE	81	9.8	5	-1.794988998	-1.150971421	-0.555838177	[-2.231,-0.484)	[-2.114,-0.505)	[-2.656,-0.455)	0.14	0.196
f	normal weight	32.26575342	FALSE	FALSE	0	0	4.46	2.19	2.03	46	0.52	4.6	5	21.31	0.740740741	122	57	FALSE	city_over_100	TRUE	average	FALSE	TRUE	TRUE	16	FALSE	80	15.4	9.5	-1.236303607	-0.312774339	-0.636692336	[-2.231,-0.484)	[-0.505, 0.266)	[-2.656,-0.455)	0.266	0.308
m	obese	31.9890411	FALSE	FALSE	1	0	4.31	2.49	1.33	31	1.07	4.7	5	34.64	0.948275862	141	90	FALSE	city_over_100	TRUE	above_average	TRUE	FALSE	FALSE	17	TRUE	110	14.1	4.357142857	-1.738312363	-0.278303892	-0.374488107	[-2.231,-0.484)	[-0.505, 0.266)	[-0.455, 0.275)	0.122	0.282
m	overweight	23.27123288	FALSE	FALSE	2	1	3.94	2.22	0.96	24	1.68	4.5	4.7	26.3	0.841121495	149	85	FALSE	city_below_20	FALSE	above_average	TRUE	FALSE	FALSE	19	FALSE	90	10	17.57142857	-0.750808243	-1.238779359	-0.304542939	[-2.231,-0.484)	[-2.114,-0.505)	[-0.455, 0.275)	0.492	0.2
m	overweight	33.47671233	FALSE	FALSE	1	0	4.24	2.3	1.42	33	1.15	4.8	5.1	29.41	0.851851852	152	104	FALSE	city_20_100	TRUE	average	FALSE	FALSE	FALSE	10	FALSE	92	37	17.28571429	-0.578130378	0.678200148	1.615078416	[-2.231,-0.484)	[ 0.266, 5.061]	[ 0.275, 5.091]	0.484	0.74
m	normal weight	23.11506849	FALSE	FALSE	1	0	3.42	1.81	1.25	37	0.79	4.9	4.8	22.88	0.84	147	83	FALSE	city_over_100	TRUE	average	FALSE	FALSE	FALSE	9	FALSE	84	23.4	17	0.103593354	0.266173934	-0.738245379	[-0.484, 0.387)	[ 0.266, 5.061]	[-2.656,-0.455)	0.476	0.468
m	normal weight	23.31506849	FALSE	FALSE	0	0	3.11	1.58	1.36	44	0.38	4.6	4.8	22.88	0.782178218	125	83	FALSE	city_over_100	TRUE	average	FALSE	FALSE	FALSE	11	FALSE	79	20.9	13.85714286	-0.126133719	0.861626262	-0.022921495	[-0.484, 0.387)	[ 0.266, 5.061]	[-0.455, 0.275)	0.388	0.418
m	normal weight	24.29589041	FALSE	FALSE	1	0	4.19	2.63	1.34	32	0.49	4.9	5	23.53	0.795698925	148	71	FALSE	city_over_100	TRUE	average	FALSE	FALSE	FALSE	15	FALSE	74	14.4	26.42857143	1.597032346	0.127894751	-1.107695927	[ 0.387, 3.526]	[-0.505, 0.266)	[-2.656,-0.455)	0.74	0.288
m	normal weight	24.30958904	FALSE	FALSE	0	0	4.81	2.95	1.49	31	0.81	5.2	5.1	24	0.78	129	78	FALSE	city_over_100	TRUE	average	FALSE	FALSE	TRUE	15	FALSE	78	19.2	21.07142857	0.408414184	0.199676127	0.324661625	[ 0.387, 3.526]	[-0.505, 0.266)	[ 0.275, 5.091]	0.59	0.384
f	normal weight	32.7260274	FALSE	FALSE	1	0	5.4	2.33	2.59	48	1.06	4.5	4.7	18.71	0.793478261	124	85	FALSE	city_20_100	TRUE	average	FALSE	TRUE	TRUE	16	FALSE	73	14.1	17.35714286	0.094538741	-1.243450451	-0.997316123	[-0.484, 0.387)	[-2.114,-0.505)	[-2.656,-0.455)	0.486	0.282
f	normal weight	21.89041096	TRUE	FALSE	0	0	4.34	1.99	2.45	56	0.56	4.7	4.9	20.13234831	0.691919192	112	80	FALSE	city_over_100	TRUE	average	FALSE	FALSE	TRUE	7	FALSE	68.5	28.8	15.64285714	-0.064612792	0.296474253	0.365984792	[-0.484, 0.387)	[ 0.266, 5.061]	[ 0.275, 5.091]	0.438	0.576
f	normal weight	22.95342466	FALSE	FALSE	0	0	3.66	1.75	1.64	45	0.59	5.3	4.9	22.77	0.656565657	106	84	FALSE	city_over_100	TRUE	average	FALSE	FALSE	FALSE	12	FALSE	65	18.8	6.857142857	-1.159553472	-0.493059183	-0.407183949	[-2.231,-0.484)	[-0.505, 0.266)	[-0.455, 0.275)	0.192	0.376
m	normal weight	23.82465753	FALSE	TRUE	1	0	4.06	1.99	1.83	45	0.53	5.1	4.9	22.53	0.793814433	141	90	FALSE	city_over_100	TRUE	average	FALSE	FALSE	FALSE	20	FALSE	77	22.3	19	0.407989246	0.633756201	0.885390625	[ 0.387, 3.526]	[ 0.266, 5.061]	[ 0.275, 5.091]	0.532	0.446
f	normal weight	26.83561644	FALSE	FALSE	0	0	5.63	3.11	2.09	37	0.94	4.4	4.7	19.03	0.714285714	98	61	TRUE	city_over_100	TRUE	average	FALSE	FALSE	TRUE	9	FALSE	70	23.7	11.35714286	-0.31000097	-0.617226999	0.853032132	[-0.484, 0.387)	[-2.114,-0.505)	[ 0.275, 5.091]	0.318	0.474
m	normal weight	28.71780822	FALSE	FALSE	1	0	4.84	2.57	1.77	37	1.09	4.6	5	24.21	0.757575758	139	86	TRUE	city_20_100	TRUE	average	FALSE	FALSE	TRUE	8	FALSE	75	22.4	25.09185714	1.430874204	0.030140559	-0.908263745	[ 0.387, 3.526]	[-0.505, 0.266)	[-2.656,-0.455)	0.701378	0.448
f	obese	30.50684932	FALSE	FALSE	2	1	5.22	3.44	1.18	23	1.33	5.1	5.2	32.53	0.774193548	151	97	FALSE	city_over_100	TRUE	average	FALSE	TRUE	TRUE	13	TRUE	96	24.1	19.42857143	0.995926029	-0.3065298	0.239828563	[ 0.387, 3.526]	[-0.505, 0.266)	[-0.455, 0.275)	0.544	0.482
f	obese	29.86849315	FALSE	FALSE	0	0	4.43	2.42	1.53	35	1.06	4.5	5.2	34.82	0.833333333	111	75	FALSE	city_over_100	TRUE	average	FALSE	FALSE	FALSE	14	TRUE	100	22.7	6.142857143	-0.420513824	1.008137173	1.434046242	[-0.484, 0.387)	[ 0.266, 5.061]	[ 0.275, 5.091]	0.172	0.454
m	normal weight	18.37534247	FALSE	FALSE	0	0	4.33	2.78	1.16	27	0.85	5.2	5	18.52	0.746987952	115	69	FALSE	city_over_100	TRUE	above_average	TRUE	FALSE	FALSE	14	FALSE	62	9.5	18	0.726863544	-0.103679325	-0.773793522	[ 0.387, 3.526]	[-0.505, 0.266)	[-2.656,-0.455)	0.504	0.19
m	normal weight	27.22191781	FALSE	FALSE	2	1	5.25	3.36	1.48	28	0.91	4.4	4.9	24.34	0.940594059	138	84	FALSE	city_over_100	TRUE	above_average	TRUE	TRUE	TRUE	10	FALSE	95	9.4	15.64285714	-0.683378283	-0.816132935	-0.76888765	[-2.231,-0.484)	[-2.114,-0.505)	[-2.656,-0.455)	0.438	0.188
m	normal weight	17.96712329	FALSE	FALSE	2	1	3.47	2.17	0.92	27	0.84	4.2	5.1	21.88	0.78125	133	86	TRUE	city_over_100	TRUE	average	FALSE	FALSE	FALSE	10	FALSE	75	5.1	20.21428571	0.940479824	-0.083392624	-1.174746615	[ 0.387, 3.526]	[-0.505, 0.266)	[-2.656,-0.455)	0.566	0.102
m	normal weight	32.86027397	FALSE	FALSE	4	1	6.83	4.95	0.85	12	2.27	4.1	5.3	24.42	0.818181818	140	84	TRUE	city_20_100	TRUE	above_average	TRUE	FALSE	TRUE	10	FALSE	81	29.2	12.35714286	-0.294442765	0.403271602	3.136049943	[-0.484, 0.387)	[ 0.266, 5.061]	[ 0.275, 5.091]	0.346	0.584
m	overweight	27.14794521	TRUE	FALSE	1	0	4.96	3.25	1.47	30	0.95	5	5	27.71768524	0.867346939	130	80	FALSE	city_over_100	TRUE	average	FALSE	FALSE	TRUE	16	FALSE	85	34.2	22.07142857	-0.281118493	0.651780016	1.916684779	[-0.484, 0.387)	[ 0.266, 5.061]	[ 0.275, 5.091]	0.618	0.684
m	overweight	31.46027397	FALSE	FALSE	2	1	7.16	5.23	1.35	19	1.27	5	5.2	25.11	0.825242718	130	80	FALSE	city_over_100	TRUE	above_average	TRUE	FALSE	TRUE	5	FALSE	85	14.1	16.14285714	-0.466757496	-0.693618754	0.043625551	[-0.484, 0.387)	[-2.114,-0.505)	[-0.455, 0.275)	0.452	0.282
f	normal weight	26.23013699	FALSE	FALSE	0	0	5.26	2.99	1.95	37	0.71	4.5	5	19.53	0.738636364	114	77	FALSE	city_20_100	TRUE	above_average	TRUE	FALSE	TRUE	18	FALSE	65	15.9	16.35714286	-0.855977564	-0.767075059	-0.062374131	[-2.231,-0.484)	[-2.114,-0.505)	[-0.455, 0.275)	0.458	0.318
m	overweight	31.29041096	FALSE	FALSE	2	1	5.21	3.52	1.28	25	0.9	4.7	5.1	25.88	0.852941176	134	84	FALSE	city_over_100	TRUE	above_average	TRUE	FALSE	TRUE	15	FALSE	87	15.9	9.142857143	0.719328495	-0.086456326	-1.004452228	[ 0.387, 3.526]	[-0.505, 0.266)	[-2.656,-0.455)	0.256	0.318
f	normal weight	28.01643836	FALSE	FALSE	1	0	5.54	2.31	2.15	39	2.38	4.3	4.8	19.38	0.726315789	123	81	FALSE	city_over_100	TRUE	average	FALSE	FALSE	TRUE	12	FALSE	69	31.3	14.14285714	-0.121878889	-0.636244111	4.06060948	[-0.484, 0.387)	[-2.114,-0.505)	[ 0.275, 5.091]	0.396	0.626
m	normal weight	27.96712329	FALSE	FALSE	1	0	5.06	2.86	1.72	34	1.06	4.6	5	24.31	0.803921569	137	95	FALSE	city_over_100	TRUE	above_average	TRUE	FALSE	TRUE	15	FALSE	82	14.8	20.35714286	0.510316811	0.665404314	-0.00167592	[ 0.387, 3.526]	[ 0.266, 5.061]	[-0.455, 0.275)	0.57	0.296
f	normal weight	26.29315068	FALSE	FALSE	1	0	4.39	2.34	1.75	40	0.66	5.5	5.1	20.96	0.708333333	127	89	FALSE	city_over_100	TRUE	below_average	FALSE	FALSE	TRUE	12	FALSE	68	17.3	4	-1.493996327	-0.189578942	-0.371393899	[-2.231,-0.484)	[-0.505, 0.266)	[-0.455, 0.275)	0.112	0.346
m	overweight	34.19178082	FALSE	FALSE	1	0	4.63	2.93	1.13	24	1.25	4.2	5	25.11	0.861386139	135	89	TRUE	city_over_100	TRUE	above_average	TRUE	FALSE	TRUE	15	FALSE	87	28.9	14.64285714	0.413331811	0.907940329	0.234007888	[ 0.387, 3.526]	[ 0.266, 5.061]	[-0.455, 0.275)	0.41	0.578
m	overweight	30.76712329	FALSE	FALSE	2	1	5.4	3.46	1.59	29	0.77	4.9	5.3	26.22	0.878787879	135	93	FALSE	city_20_100	TRUE	above_average	TRUE	FALSE	TRUE	12	FALSE	87	37.8	12.57142857	0.194546245	1.997972455	0.072540521	[-0.484, 0.387)	[ 0.266, 5.061]	[-0.455, 0.275)	0.352	0.756
m	normal weight	28.4109589	FALSE	FALSE	4	1	4.5	2.86	0.81	18	1.83	5.7	4.9	24.91	0.846153846	130	85	FALSE	city_20_100	TRUE	average	FALSE	FALSE	TRUE	8	FALSE	88	16.7	11.28571429	-0.981701092	-1.094489543	0.441059957	[-2.231,-0.484)	[-2.114,-0.505)	[ 0.275, 5.091]	0.316	0.334
f	normal weight	24.04109589	FALSE	FALSE	1	0	4.85	2.44	2.07	43	0.75	5.6	5	19.1	0.693877551	119	80	FALSE	village	FALSE	average	FALSE	TRUE	FALSE	15	FALSE	68	21.2	7.214285714	-1.257548716	-0.166112514	-0.124359215	[-2.231,-0.484)	[-0.505, 0.266)	[-0.455, 0.275)	0.202	0.424
f	obese	34.43835616	TRUE	TRUE	4	1	5.41	3.91	0.9	17	1.9	5.6	5	35.62901745	0.8984375	125	90	FALSE	city_over_100	TRUE	average	FALSE	TRUE	TRUE	10	TRUE	115	13	15.80464286	-0.39465565	-0.656471903	-0.821417185	[-0.484, 0.387)	[-2.114,-0.505)	[-2.656,-0.455)	0.44078	0.26
m	normal weight	20.71506849	FALSE	FALSE	0	0	3.46	1.52	1.53	44	0.91	4.7	4.8	19.32	0.789473684	116	71	FALSE	city_below_20	FALSE	above_average	TRUE	FALSE	FALSE	14	FALSE	75	23.8	10.28571429	-0.500964158	0.694065751	-0.030413042	[-2.231,-0.484)	[ 0.266, 5.061]	[-0.455, 0.275)	0.288	0.476
m	normal weight	23.62739726	FALSE	FALSE	1	0	4.47	2.89	1.36	30	0.49	5.3	5	22.2	1.111111111	142	71	FALSE	city_over_100	TRUE	average	FALSE	FALSE	FALSE	14	FALSE	100	38.1	20.71428571	1.14988782	0.263772211	2.374139126	[ 0.387, 3.526]	[-0.505, 0.266)	[ 0.275, 5.091]	0.58	0.762
f	normal weight	22.14520548	FALSE	FALSE	0	0	4.59	1.92	2.26	49	0.9	4.4	4.8	20.2	0.85	116.581	73.1	TRUE	city_over_100	TRUE	above_average	TRUE	FALSE	FALSE	14	FALSE	68	34.6	23.64285714	-0.45033667	0.208179922	0.454442019	[-0.484, 0.387)	[-0.505, 0.266)	[ 0.275, 5.091]	0.662	0.692
f	normal weight	20.89589041	FALSE	FALSE	0	0	4.39	2.44	1.74	40	0.47	4.7	4.8	20.28	0.795454545	114.7633333	71.4867	TRUE	city_over_100	TRUE	above_average	TRUE	FALSE	FALSE	15	FALSE	70	29.2	18.57142857	0.651981378	1.983158406	0.158118095	[ 0.387, 3.526]	[ 0.266, 5.061]	[-0.455, 0.275)	0.52	0.584
f	normal weight	20.72876712	FALSE	FALSE	0	0	4.26	2.46	1.65	39	0.34	4.3	4.8	20.96	0.885057471	116.293	70.579	FALSE	city_over_100	TRUE	average	FALSE	FALSE	FALSE	11	FALSE	77	38.4	4.714285714	-1.722636584	1.470091852	1.02875993	[-2.231,-0.484)	[ 0.266, 5.061]	[ 0.275, 5.091]	0.132	0.768
f	normal weight	20.12054795	FALSE	FALSE	0	0	4.63	2.83	1.44	31	0.79	4.6	4.8	21.71	0.805990551	118.849	73.071	FALSE	city_over_100	TRUE	average	FALSE	FALSE	FALSE	8	FALSE	74.05758571	48.1	26.28571429	-0.623976363	1.685847822	-0.370379548	[-2.231,-0.484)	[ 0.266, 5.061]	[-0.455, 0.275)	0.736	0.962
m	obese	27.42739726	FALSE	FALSE	3	1	4.34	2.49	1	23	1.87	5.9	4.9	33.58	0.960002162	137.609	83.3515	FALSE	city_over_100	TRUE	average	FALSE	TRUE	FALSE	8	TRUE	106.0375	16.3	33.07142857	0.264337285	-0.63166901	1.144552565	[-0.484, 0.387)	[-2.114,-0.505)	[ 0.275, 5.091]	0.926	0.326
f	normal weight	23.76438356	FALSE	FALSE	1	0	5.01	3.05	1.52	30	0.96	4.5	4.9	23.88	0.718446602	131	77	TRUE	city_over_100	TRUE	average	FALSE	FALSE	FALSE	8	FALSE	74	19.5	19.92857143	1.238269706	-0.162479806	0.096523729	[ 0.387, 3.526]	[-0.505, 0.266)	[-0.455, 0.275)	0.558	0.39
m	normal weight	24.89863014	FALSE	FALSE	0	0	3.82	2.25	1.27	33	0.66	4.3	5.3	20.45	0.821052632	128	79	TRUE	city_over_100	TRUE	average	FALSE	TRUE	FALSE	11	FALSE	78	14.3	14.35714286	0.27908728	-1.063459018	-0.776379459	[-0.484, 0.387)	[-2.114,-0.505)	[-2.656,-0.455)	0.402	0.286
m	overweight	24.91232877	TRUE	FALSE	2	1	5.69	3.51	1.69	30	1.07	4.5	5	25.36	0.928571429	143	97	FALSE	village	FALSE	average	FALSE	FALSE	TRUE	9	FALSE	91	23	16.5	0.494246668	-0.977231595	0.732910946	[ 0.387, 3.526]	[-2.114,-0.505)	[ 0.275, 5.091]	0.462	0.46
m	normal weight	28.36438356	TRUE	FALSE	3	1	9.49	7.48	1.28	13	3.36	5.1	5.3	24.32610125	0.981132075	135	85	FALSE	city_20_100	TRUE	average	FALSE	FALSE	FALSE	14	TRUE	104	19.4	26.35714286	0.187170444	0.99034272	1.521671171	[-0.484, 0.387)	[ 0.266, 5.061]	[ 0.275, 5.091]	0.738	0.388
m	normal weight	23.10136986	TRUE	FALSE	1	0	4.98	2.89	2.05	41	0.57	5.2	4.7	22.83950617	0.806930693	130	80	TRUE	city_20_100	TRUE	average	FALSE	FALSE	TRUE	18	FALSE	81.5	23.5	17.5	0.802814171	0.775025687	-0.64322678	[ 0.387, 3.526]	[ 0.266, 5.061]	[-2.656,-0.455)	0.49	0.47
m	normal weight	25.75890411	FALSE	FALSE	2	1	5.26	3.04	1.74	33	1.05	5.1	5.1	24.65	0.824074074	136	85	FALSE	village	FALSE	above_average	TRUE	FALSE	TRUE	13	FALSE	89	13.7	11.57142857	-0.940817658	-0.057578468	-0.71692115	[-2.231,-0.484)	[-0.505, 0.266)	[-2.656,-0.455)	0.324	0.274
m	overweight	29.81643836	FALSE	FALSE	0	0	3.79	2.41	1.12	30	0.57	4.6	5.3	26.64	0.828282828	114	74	TRUE	city_over_100	TRUE	average	FALSE	FALSE	TRUE	10	FALSE	82	6.6	28.64285714	0.50875608	-0.589803982	-1.960254173	[ 0.387, 3.526]	[-2.114,-0.505)	[-2.656,-0.455)	0.802	0.132
f	normal weight	28.54520548	TRUE	FALSE	0	0	4.58	2.1	2.23	49	0.56	4.6	5.1	18.25	0.744444444	115	72	FALSE	city_below_20	FALSE	average	FALSE	TRUE	TRUE	13	FALSE	67	10.8	15.64285714	0.331798935	-1.107103087	-0.511514457	[-0.484, 0.387)	[-2.114,-0.505)	[-2.656,-0.455)	0.438	0.216
f	normal weight	21.69041096	FALSE	FALSE	0	0	3.13	1.45	1.48	47	0.44	4.7	5	18.94	0.741935484	120	77	FALSE	village	FALSE	average	FALSE	FALSE	FALSE	14	FALSE	69	11.2	14.92857143	1.428631168	-0.916588568	-0.547419037	[ 0.387, 3.526]	[-2.114,-0.505)	[-2.656,-0.455)	0.418	0.224
f	normal weight	25.90136986	FALSE	FALSE	1	0	4.9	3.17	1.25	26	1.05	4.5	4.9	23.87511478	0.87	110	65	FALSE	village	FALSE	average	FALSE	TRUE	TRUE	14	FALSE	87	25.2	10.42857143	-0.336239023	0.013458367	-0.206072659	[-0.484, 0.387)	[-0.505, 0.266)	[-0.455, 0.275)	0.292	0.504
m	normal weight	25.48767123	FALSE	FALSE	0	0	5.1	2.94	1.61	32	1.2	4.7	4.8	23.46	0.791208791	124	74	FALSE	city_over_100	TRUE	average	FALSE	FALSE	TRUE	10	FALSE	72	23.4	22.78571429	1.37612406	0.87022746	-0.363322884	[ 0.387, 3.526]	[ 0.266, 5.061]	[-0.455, 0.275)	0.638	0.468
f	obese	24.03287671	FALSE	FALSE	2	1	5.44	2.79	1.43	26	2.68	4.9	4.9935	31.89	0.796610169	129	91	TRUE	city_over_100	TRUE	above_average	TRUE	FALSE	FALSE	12	TRUE	94	28.4	19.57142857	0.803135901	-0.141187082	0.613888859	[ 0.387, 3.526]	[-0.505, 0.266)	[ 0.275, 5.091]	0.548	0.568
f	normal weight	33.72876712	TRUE	TRUE	0	0	4.27	2.46	1.57	37	0.53	4.7	5	24.34	0.782178218	120	82	FALSE	city_over_100	TRUE	average	FALSE	TRUE	TRUE	15	FALSE	79	23.8	9.642857143	-1.399072128	0.676161045	0.7468569	[-2.231,-0.484)	[ 0.266, 5.061]	[ 0.275, 5.091]	0.27	0.476
m	normal weight	27.88767123	FALSE	FALSE	1	0	3.43	1.59	1.59	46	0.56	4.5	4.8	23.63	0.965909091	130	72	FALSE	city_over_100	TRUE	average	FALSE	FALSE	TRUE	11	FALSE	85	13.4	16.42857143	-0.158968252	-0.565102311	-1.110165984	[-0.484, 0.387)	[-2.114,-0.505)	[-2.656,-0.455)	0.46	0.268
m	overweight	28.73972603	FALSE	FALSE	1	0	3.95	1.62	2.08	53	0.54	4.6	5.1	27.06	0.875647403	135	75	FALSE	city_over_100	TRUE	average	FALSE	FALSE	FALSE	13	FALSE	86.962	24.1	19	0.806225095	-0.323589389	0.456477361	[ 0.387, 3.526]	[-0.505, 0.266)	[ 0.275, 5.091]	0.532	0.482
f	normal weight	19.43835616	TRUE	FALSE	1	0	4.13	2.33	1.72	42	0.8	6.2	4.8	19.46740129	0.842105263	110	50	FALSE	village	FALSE	average	FALSE	FALSE	FALSE	6	FALSE	64	39.1	23.07142857	1.448091343	1.999811394	2.347237299	[ 0.387, 3.526]	[ 0.266, 5.061]	[ 0.275, 5.091]	0.646	0.782
f	normal weight	32.05753425	FALSE	FALSE	0	0	5.65	2.96	2.35	42	0.75	4.9	5.2	21.28	0.646464646	128	73	FALSE	city_20_100	TRUE	average	FALSE	FALSE	TRUE	18	FALSE	64	12.6	20.85714286	0.628976764	-0.344021111	1.456271757	[ 0.387, 3.526]	[-0.505, 0.266)	[ 0.275, 5.091]	0.584	0.252
m	normal weight	31.73972603	FALSE	FALSE	3	1	5.54	2.37	2.26	41	2	5.6	5.3	20.76	0.739130435	113	63	FALSE	city_over_100	TRUE	above_average	TRUE	FALSE	TRUE	13	FALSE	68	22.8	11.28571429	-1.61195088	-0.2022484	0.539047798	[-2.231,-0.484)	[-0.505, 0.266)	[ 0.275, 5.091]	0.316	0.456
m	overweight	33.98630137	FALSE	TRUE	4	1	5.22	2.64	0.99	19	3.49	4.7	5.1	28.41	0.918367347	148	86	FALSE	city_over_100	TRUE	average	FALSE	FALSE	FALSE	9	FALSE	90	17.3	11.07142857	-1.135456786	0.382822316	0.184952423	[-2.231,-0.484)	[ 0.266, 5.061]	[-0.455, 0.275)	0.31	0.346
m	normal weight	20.27123288	FALSE	FALSE	0	0	3.06	0.96	1.92	63	0.39	4.4	4.9	17.53	0.741176471	121	78	TRUE	city_over_100	TRUE	average	FALSE	FALSE	FALSE	9	FALSE	63	14.5	13.92857143	-0.410740952	-1.115761269	-1.107019542	[-0.484, 0.387)	[-2.114,-0.505)	[-2.656,-0.455)	0.39	0.29
f	normal weight	20.39178082	FALSE	FALSE	0	0	3.34	1.14	1.86	56	0.75	4.4	4.8	17.51	0.7	121	67	TRUE	city_over_100	TRUE	average	FALSE	FALSE	FALSE	9	FALSE	63	18.4	7.428571429	-1.751600772	-1.075050789	-0.447484768	[-2.231,-0.484)	[-2.114,-0.505)	[-0.455, 0.275)	0.208	0.368
f	normal weight	22.85205479	FALSE	FALSE	0	0	3.29	1.55	1.52	46	0.48	4.7	4.7	20.08	0.691489362	105	63	FALSE	city_below_20	FALSE	above_average	TRUE	FALSE	FALSE	15	FALSE	65	15.1	13.14285714	-0.885648026	0.583663485	-0.553238205	[-2.231,-0.484)	[ 0.266, 5.061]	[-2.656,-0.455)	0.368	0.302
m	normal weight	21.24657534	FALSE	FALSE	1	0	4.68	2.58	1.71	37	0.86	4.9	5	21.22	0.74	158	100	FALSE	city_over_100	TRUE	average	FALSE	FALSE	FALSE	14	FALSE	74	24	38.42857143	2.847116	0.33575105	2.745218815	[ 0.387, 3.526]	[ 0.266, 5.061]	[ 0.275, 5.091]	1.076	0.48
f	normal weight	21.80821918	FALSE	FALSE	0	0	3.77	1.97	1.58	42	0.49	4.6	4.8439	19.95935549	0.714285714	102	68	FALSE	city_over_100	TRUE	below_average	FALSE	FALSE	FALSE	12.677	FALSE	65	20.1285	17.2182381	0.631688761	-0.12551116	0.698645128	[ 0.387, 3.526]	[-0.505, 0.266)	[ 0.275, 5.091]	0.480122	0.395346
f	normal weight	18.29315068	FALSE	FALSE	0	0	3.35	1.23	1.71	51	0.9	4.8	5.1	20.31	0.666666667	114	67	TRUE	city_over_100	TRUE	below_average	FALSE	FALSE	FALSE	9	FALSE	64	11.2	16.07142857	1.450529035	-0.371993024	-0.249284876	[ 0.387, 3.526]	[-0.505, 0.266)	[-0.455, 0.275)	0.45	0.224
m	normal weight	21.58630137	FALSE	FALSE	0	0	3.85	1.74	1.64	43	1.03	4.3	4.7	18.29	0.755319149	121	72	TRUE	city_20_100	TRUE	average	FALSE	TRUE	FALSE	5	FALSE	71	7	23.35714286	2.512026499	-1.254972716	-0.913344877	[ 0.387, 3.526]	[-2.114,-0.505)	[-2.656,-0.455)	0.654	0.14
m	obese	25.72876712	TRUE	FALSE	3	1	7.49	5.37	1.16	15	3.15	5.8	5.2	30.47052154	0.93877551	120	80	FALSE	city_over_100	TRUE	average	FALSE	TRUE	FALSE	6	FALSE	92	10.7	17.92857143	0.358212777	-1.343594556	-0.390318777	[-0.484, 0.387)	[-2.114,-0.505)	[-0.455, 0.275)	0.502	0.214
m	normal weight	32.05479452	FALSE	FALSE	1	0	3.71	2.11	1.31	35	0.64	5.1	5	23.89	0.845360825	144	71	FALSE	city_over_100	TRUE	average	FALSE	FALSE	TRUE	10	FALSE	82	10.4	10.71428571	-0.367200576	-0.748167386	0.406423223	[-0.484, 0.387)	[-2.114,-0.505)	[ 0.275, 5.091]	0.3	0.208
m	overweight	32.09041096	FALSE	FALSE	5	1	7.56	5.92	0.49	6	2.54	5.6	5	26.03	0.920671181	138	86	FALSE	city_over_100	TRUE	average	FALSE	FALSE	TRUE	19	FALSE	91.434	21.3	17.64285714	-1.053686599	-0.477715422	-0.357927913	[-2.231,-0.484)	[-0.505, 0.266)	[-0.455, 0.275)	0.494	0.426
m	overweight	32.16986301	FALSE	FALSE	1	0	3.08	0.94	1.78	58	0.8	5.1	5.2	25.66	0.956043956	132	74	FALSE	city_over_100	TRUE	above_average	TRUE	FALSE	TRUE	8	FALSE	87	6.9	14.42857143	-0.599801857	-0.308190789	-1.048389628	[-2.231,-0.484)	[-0.505, 0.266)	[-2.656,-0.455)	0.404	0.138
f	normal weight	18.59452055	FALSE	FALSE	0	0	3.26	1	1.99	61	0.6	4.2	4.9	17.56	0.725274725	100	65	FALSE	city_over_100	TRUE	average	FALSE	TRUE	FALSE	14	FALSE	66	26.2	20.57142857	0.825405035	-0.524894104	2.30178563	[ 0.387, 3.526]	[-2.114,-0.505)	[ 0.275, 5.091]	0.576	0.524
m	overweight	30.63561644	TRUE	FALSE	1	0	3.91	1.87	1.79	46	0.54	5.1	5.1	26.04	0.783783784	143	80	FALSE	city_20_100	TRUE	average	FALSE	FALSE	TRUE	14	FALSE	87	19.9	21.71428571	0.93286192	0.852288124	-0.955861923	[ 0.387, 3.526]	[ 0.266, 5.061]	[-2.656,-0.455)	0.608	0.398
m	normal weight	25.61917808	FALSE	FALSE	0	0	4.9	2.62	1.83	37	0.98	5	4.9	23.27	0.918367347	120	83	TRUE	city_over_100	TRUE	above_average	TRUE	TRUE	TRUE	12	FALSE	90	14.9	11.28571429	-0.75183141	0.127331794	-0.726761384	[-2.231,-0.484)	[-0.505, 0.266)	[-2.656,-0.455)	0.316	0.298
m	normal weight	25.37260274	FALSE	FALSE	2	1	5.54	3.22	1.28	23	2.29	4.9	4.7	24.22	0.966666667	105	68	TRUE	city_over_100	TRUE	average	FALSE	FALSE	TRUE	14	FALSE	87	15.1	16.5	0.178508974	0.051860703	-0.854983969	[-0.484, 0.387)	[-0.505, 0.266)	[-2.656,-0.455)	0.462	0.302
m	normal weight	34.30136986	FALSE	FALSE	3	1	4.58	2.38	1.3	28	1.99	6.3	5.4	24.78	0.958333333	130	80	FALSE	city_over_100	TRUE	above_average	TRUE	FALSE	TRUE	21	FALSE	92	25.6	12.57142857	0.30874119	0.10559497	1.222661322	[-0.484, 0.387)	[-0.505, 0.266)	[ 0.275, 5.091]	0.352	0.512
m	overweight	28.32876712	FALSE	FALSE	2	1	5.08	3.18	1.29	25	1.35	5.6	5.1	26.32	1	154	96	FALSE	village	FALSE	average	FALSE	FALSE	TRUE	9	TRUE	102	22.8	13.07142857	-0.073436086	0.369052778	0.780279561	[-0.484, 0.387)	[ 0.266, 5.061]	[ 0.275, 5.091]	0.366	0.456
m	normal weight	27.8739726	FALSE	FALSE	1	0	4.92	3.42	1.05	21	1	4.5	5	23.56663223	0.858823529	133	79	TRUE	city_over_100	TRUE	average	FALSE	FALSE	FALSE	4	FALSE	73	11.9	17.71428571	1.17321877	-0.17925017	-0.476115713	[ 0.387, 3.526]	[-0.505, 0.266)	[-2.656,-0.455)	0.496	0.238
m	overweight	35.26849315	TRUE	FALSE	1	0	5.83	3.59	2.11	36	0.71	5.4	5.1	27.1430375	0.91	120	70	TRUE	city_over_100	TRUE	average	FALSE	FALSE	FALSE	10	FALSE	91	24	26.42857143	1.144055347	-0.367494131	-0.467178137	[ 0.387, 3.526]	[-0.505, 0.266)	[-2.656,-0.455)	0.74	0.48
m	normal weight	28.40547945	FALSE	FALSE	1	0	4.8	2.85	1.45	30	1.1	4.5	4.8	24.21	0.811111111	137	83	FALSE	city_20_100	TRUE	average	FALSE	FALSE	TRUE	14	FALSE	73	11.5	26.85714286	0.998671496	-1.878622551	1.828146311	[ 0.387, 3.526]	[-2.114,-0.505)	[ 0.275, 5.091]	0.752	0.23
f	normal weight	29.90136986	FALSE	FALSE	1	0	4.38	1.55	2.33	53	1.11	5	4.8	22.86	0.777777778	131	77	FALSE	city_over_100	TRUE	average	FALSE	FALSE	TRUE	17	FALSE	70	18.4	17.5	-1.566322598	-1.066590245	-0.348487486	[-2.231,-0.484)	[-2.114,-0.505)	[-0.455, 0.275)	0.49	0.368
f	normal weight	28.67123288	FALSE	FALSE	1	0	4.25	1.46	2.3	54	1.08	4.9	4.8	21.19	0.848101266	138	99	FALSE	city_over_100	TRUE	average	FALSE	TRUE	FALSE	14	FALSE	67	11.7	21.28571429	0.085513848	-1.218858264	0.206643544	[-0.484, 0.387)	[-2.114,-0.505)	[-0.455, 0.275)	0.596	0.234
f	overweight	24.45479452	FALSE	TRUE	0	0	5.68	3.71	1.35	24	1.36	4.6	5	29.74	0.945454545	119.3628	74.0245	TRUE	city_over_100	TRUE	average	FALSE	FALSE	FALSE	11	TRUE	104	15.6	9.571428571	-0.516719864	-0.294806667	-0.167357157	[-2.231,-0.484)	[-0.505, 0.266)	[-0.455, 0.275)	0.268	0.312
f	overweight	34.51780822	FALSE	FALSE	0	0	3.91	1.88	1.73	44	0.65	4.4	5.1	25.71	0.788990826	110	67	FALSE	village	FALSE	average	FALSE	FALSE	TRUE	15	FALSE	86	42.1	11.5	-0.945866867	-0.100796536	0.910942823	[-2.231,-0.484)	[-0.505, 0.266)	[ 0.275, 5.091]	0.322	0.842
f	normal weight	24.42191781	TRUE	FALSE	0	0	5.32	2.33	2.7	51	0.64	4.3	5.1	17.51	0.777777778	109	68	TRUE	city_20_100	TRUE	average	FALSE	FALSE	TRUE	15	FALSE	70	26.7	12.07142857	0.463824282	-0.49292531	1.90035332	[ 0.387, 3.526]	[-0.505, 0.266)	[ 0.275, 5.091]	0.338	0.534
f	normal weight	23.80821918	FALSE	FALSE	0	0	2.99	1.09	1.47	49	0.95	5.3	4.8	21.6	0.788888889	118	63	FALSE	city_over_100	TRUE	average	FALSE	FALSE	TRUE	15	FALSE	71	35.6	5.142857143	-1.724840714	0.190780188	-0.092459292	[-2.231,-0.484)	[-0.505, 0.266)	[-0.455, 0.275)	0.144	0.712
f	normal weight	32.95068493	FALSE	TRUE	0	0	4.3	2.11	1.88	44	0.68	4.5	4.9	21.34	0.760869565	108	67	FALSE	city_over_100	TRUE	average	FALSE	FALSE	TRUE	12	FALSE	70	20.9	13.78571429	-1.03910283	0.850188276	-0.863437916	[-2.231,-0.484)	[ 0.266, 5.061]	[-2.656,-0.455)	0.386	0.418
m	overweight	31.16164384	FALSE	FALSE	2	1	5.96	3.42	2.04	34	1.08	4.7	4.7	29.39	0.885714286	148	98	FALSE	city_over_100	TRUE	above_average	TRUE	TRUE	FALSE	5	FALSE	93	12.2	22.07142857	0.519975259	-0.333004266	-2.05071017	[ 0.387, 3.526]	[-0.505, 0.266)	[-2.656,-0.455)	0.618	0.244
f	normal weight	28.01369863	FALSE	FALSE	1	0	5.66	4.01	1.15	20	1.1	4.8	5	19.96	0.643564356	113	63	FALSE	city_below_20	FALSE	average	FALSE	FALSE	TRUE	13	FALSE	65	34.2	9.5	-0.043096311	0.388107998	0.43105253	[-0.484, 0.387)	[ 0.266, 5.061]	[ 0.275, 5.091]	0.266	0.684
f	obese	30.93972603	TRUE	FALSE	0	0	5.24	3.69	1.29	25	1.47	5.5	5.4	30.85960738	0.897196262	110	70	TRUE	city_20_100	TRUE	average	FALSE	FALSE	TRUE	9	TRUE	96	7.6	9.714285714	-1.191701542	-1.062366215	-0.246381002	[-2.231,-0.484)	[-2.114,-0.505)	[-0.455, 0.275)	0.272	0.152
m	overweight	26.12328767	FALSE	FALSE	4	1	5.85	3.53	1.53	26	1.74	5.8	5.1	28.7	0.873786408	146	92	FALSE	city_below_20	FALSE	average	FALSE	TRUE	FALSE	10	FALSE	90	2.2	14.5	0.089374808	-1.42662569	-1.549489042	[-0.484, 0.387)	[-2.114,-0.505)	[-2.656,-0.455)	0.406	0.044
f	normal weight	24.29315068	FALSE	FALSE	1	0	5.44	3.36	1.77	33	0.69	5.4	5.1	23.71	0.766990291	130	75	TRUE	city_below_20	FALSE	average	FALSE	FALSE	TRUE	17	FALSE	79	28.4	10.21428571	0.354590421	2.324029102	-0.936533233	[-0.484, 0.387)	[ 0.266, 5.061]	[-2.656,-0.455)	0.286	0.568
f	normal weight	30.22191781	TRUE	TRUE	0	0	5.3	2.85	2.1	40	0.78	5.1	5	24.24	0.80211412	110	72	FALSE	city_below_20	FALSE	average	FALSE	TRUE	TRUE	17	FALSE	75.3345	28.7	17.42857143	0.934270121	-0.890500098	1.371549983	[ 0.387, 3.526]	[-2.114,-0.505)	[ 0.275, 5.091]	0.488	0.574
f	overweight	27.56164384	FALSE	FALSE	2	1	4.93	3.15	1.27	26	1.12	5.6	4.8	26.67	0.88	110	72	FALSE	city_over_100	TRUE	average	FALSE	FALSE	TRUE	17	TRUE	88	20.9	13.64285714	0.073081984	-0.051160865	-0.439805894	[-0.484, 0.387)	[-0.505, 0.266)	[-0.455, 0.275)	0.382	0.418
m	overweight	32.09863014	FALSE	FALSE	2	1	6.66	4.1	2.22	33	0.75	4.4	5.2	25.15	1	129	85	FALSE	city_below_20	FALSE	average	FALSE	FALSE	FALSE	9	FALSE	95	19.1	25.14285714	2.045007579	0.42194429	-0.510193714	[ 0.387, 3.526]	[ 0.266, 5.061]	[-2.656,-0.455)	0.704	0.382
f	normal weight	29.15068493	FALSE	FALSE	0	0	5.71	3.14	2.1	37	1.03	4.8	4.8	19.81	0.761904762	120	72	FALSE	city_20_100	TRUE	average	FALSE	FALSE	FALSE	12	FALSE	64	10.8	15.5	0.81311497	-0.155271154	-0.067443955	[ 0.387, 3.526]	[-0.505, 0.266)	[-0.455, 0.275)	0.434	0.216
m	overweight	30.62739726	FALSE	FALSE	2	1	7.7	5.33	1.81	24	1.23	5.2	4.9	29.67	0.821782178	131	83	TRUE	city_over_100	TRUE	average	FALSE	FALSE	TRUE	10	FALSE	83	17.4	34.78571429	1.65542379	0.580956954	-0.825707478	[ 0.387, 3.526]	[ 0.266, 5.061]	[-2.656,-0.455)	0.974	0.348
m	overweight	34.37260274	FALSE	FALSE	0	0	4.58	2.75	1.51	33	0.71	4.9	5.2	25.18	0.861702128	125	78	FALSE	city_below_20	FALSE	average	FALSE	FALSE	FALSE	12	FALSE	81	28.8	16.92857143	-0.265482153	0.845898057	1.159621053	[-0.484, 0.387)	[ 0.266, 5.061]	[ 0.275, 5.091]	0.474	0.576
f	overweight	27.94520548	FALSE	FALSE	0	0	4.9	2.41	1.99	41	1.11	4.1	4.9	26.17	0.791666667	111	76	FALSE	city_over_100	TRUE	above_average	TRUE	TRUE	TRUE	18	FALSE	76	6.6	17.14285714	-0.462273484	-0.704480849	-0.642860889	[-0.484, 0.387)	[-2.114,-0.505)	[-2.656,-0.455)	0.48	0.132
m	obese	27.89589041	FALSE	FALSE	2	1	4.95	2.65	1.15	25	2.3	5	5.1	36.52	0.973913043	132	77	FALSE	city_over_100	TRUE	average	FALSE	TRUE	FALSE	13	TRUE	112	4.8	12.78571429	1.149808226	-0.872352438	-1.307203046	[ 0.387, 3.526]	[-2.114,-0.505)	[-2.656,-0.455)	0.358	0.096
f	overweight	31.48493151	TRUE	FALSE	0	0	6.15	4.23	1.33	22	1.21	5	4.8	27.47562949	0.89	121	80	TRUE	city_below_20	FALSE	average	FALSE	TRUE	FALSE	8	TRUE	89	14.8	5.357142857	-1.181601833	0.150802927	0.804200739	[-2.231,-0.484)	[-0.505, 0.266)	[ 0.275, 5.091]	0.15	0.296
m	overweight	25.58082192	FALSE	FALSE	2	1	4.55	2.88	0.9	20	1.69	4.7	5.1	25.38	0.852631579	117	71	FALSE	city_over_100	TRUE	average	FALSE	FALSE	TRUE	7	FALSE	81	31	19.85714286	-0.809479865	-0.356971633	1.749513172	[-2.231,-0.484)	[-0.505, 0.266)	[ 0.275, 5.091]	0.556	0.62
m	normal weight	26.8630137	FALSE	FALSE	1	0	3.08	2	0.84	27	0.53	5	4.8	24.96	0.93258427	113	66	FALSE	city_20_100	TRUE	average	FALSE	FALSE	TRUE	10	FALSE	83	25.3	15.64285714	0.289963371	-0.28670372	-0.16002168	[-0.484, 0.387)	[-0.505, 0.266)	[-0.455, 0.275)	0.438	0.506
m	overweight	21.18630137	FALSE	FALSE	1	0	2.53	1.48	0.89	35	0.36	4.9	4.5	25.15	0.89010989	125	75	FALSE	city_20_100	TRUE	average	FALSE	FALSE	FALSE	9	FALSE	81	27.4	20.21428571	-0.725435306	0.268275502	0.03307872	[-2.231,-0.484)	[ 0.266, 5.061]	[-0.455, 0.275)	0.566	0.548
f	normal weight	24.04931507	FALSE	FALSE	2	1	5.45	3.16	1.5	28	1.73	4.8	5.1	20.06	0.733333333	130	71	FALSE	city_over_100	TRUE	above_average	TRUE	FALSE	TRUE	18	FALSE	66	20.6	22.35714286	1.236087623	-0.165948895	0.670128008	[ 0.387, 3.526]	[-0.505, 0.266)	[ 0.275, 5.091]	0.626	0.412
m	normal weight	27.07945205	TRUE	FALSE	2	1	5.72	3.66	1.64	29	0.93	4.5	4.6	24.49	0.967032967	131	77	FALSE	city_over_100	TRUE	average	FALSE	FALSE	TRUE	12	FALSE	88	21	12.28571429	1.191814556	2.113029823	0.012349411	[ 0.387, 3.526]	[ 0.266, 5.061]	[-0.455, 0.275)	0.344	0.42
m	overweight	35.89315068	FALSE	FALSE	3	1	6.42	3.94	0.96	15	4.77	5.5	4.9	29.7	0.935830121	120	80	FALSE	city_over_100	TRUE	above_average	TRUE	TRUE	TRUE	11.8035	FALSE	94.64766667	20.0706	22.92914286	-0.123729665	-0.934471923	1.409721942	[-0.484, 0.387)	[-2.114,-0.505)	[ 0.275, 5.091]	0.641488	0.400396
m	overweight	24.64657534	FALSE	FALSE	0	0	4.24	2.43	1.46	34	0.76	4.5	4.5	29.07	0.847619048	124	69	FALSE	city_over_100	TRUE	above_average	TRUE	FALSE	TRUE	20	FALSE	89	36	11	-1.115760688	0.920522789	1.105238855	[-2.231,-0.484)	[ 0.266, 5.061]	[ 0.275, 5.091]	0.308	0.72
m	overweight	25	FALSE	FALSE	1	0	4.88	3.25	1.12	23	1.12	5.1	4.6	27.8	0.9	125	85	TRUE	city_over_100	TRUE	above_average	TRUE	TRUE	TRUE	16	FALSE	90	9.4	10.78571429	-0.224001861	-0.819280765	-0.93519208	[-0.484, 0.387)	[-2.114,-0.505)	[-2.656,-0.455)	0.302	0.188
f	overweight	21.67123288	TRUE	FALSE	1	0	4.83	2.71	1.3	27	1.8	4.3	4.9	27.13	0.772727273	118	71	TRUE	city_over_100	TRUE	below_average	FALSE	FALSE	FALSE	17	FALSE	85	18.7	11	-0.34451375	-0.383607989	-0.376343487	[-0.484, 0.387)	[-0.505, 0.266)	[-0.455, 0.275)	0.308	0.374
m	overweight	25.89589041	TRUE	FALSE	2	1	6.31	4.1	1.22	19	2.18	4.6	5	28.81	0.807017544	122	81	FALSE	city_over_100	TRUE	average	FALSE	FALSE	TRUE	10	FALSE	92	21	15.5	-0.149307745	0.148683244	-0.496325254	[-0.484, 0.387)	[-0.505, 0.266)	[-2.656,-0.455)	0.434	0.42
m	overweight	35.89315068	TRUE	FALSE	1	0	5.03	3.28	1.36	27	1.32	5	4.9	28.39372634	0.942307692	135	89	FALSE	city_over_100	TRUE	above_average	TRUE	FALSE	TRUE	17	FALSE	98	35.6	25.57142857	1.552253753	1.911484668	-0.455344401	[ 0.387, 3.526]	[ 0.266, 5.061]	[-2.656,-0.455)	0.716	0.712
f	normal weight	25.97260274	FALSE	FALSE	1	0	3.71	1.79	1.64	44	0.62	3.9	4.4	22.49	0.83908046	138	101	FALSE	city_20_100	TRUE	average	FALSE	FALSE	TRUE	20	FALSE	73	38.1	25.57142857	0.324444352	-0.269084915	0.162861108	[-0.484, 0.387)	[-0.505, 0.266)	[-0.455, 0.275)	0.716	0.762
f	normal weight	25.8739726	FALSE	FALSE	1	0	5.1	2.26	2.39	47	0.98	3.9	4.6	18.1	0.722222222	131	87	FALSE	city_over_100	TRUE	average	FALSE	FALSE	TRUE	18	FALSE	65	48.9	7.642857143	-1.063861013	1.369357231	-0.417275669	[-2.231,-0.484)	[ 0.266, 5.061]	[-0.455, 0.275)	0.214	0.978
m	overweight	25.61369863	FALSE	FALSE	0	0	3.6	2.1	1.12	31	0.7	4.6	4.8	25.38	0.882978723	129	78	FALSE	city_20_100	TRUE	above_average	TRUE	FALSE	TRUE	17	FALSE	83	15.9	34.42857143	1.659395244	-1.012486251	0.036470094	[ 0.387, 3.526]	[-2.114,-0.505)	[-0.455, 0.275)	0.964	0.318
m	normal weight	28.07671233	FALSE	FALSE	1	0	5.19	2.69	2.14	41	0.79	4.8	5.1	21.85	0.88172043	111	72	TRUE	city_over_100	TRUE	average	FALSE	FALSE	TRUE	11	FALSE	82	31.3	33.78571429	1.007878915	0.984842464	-1.26500273	[ 0.387, 3.526]	[ 0.266, 5.061]	[-2.656,-0.455)	0.946	0.626
f	normal weight	31.19178082	FALSE	FALSE	0	0	4.93	2.78	1.83	37	0.7	4.7	4.7	21.08	0.858695652	120	76	FALSE	city_over_100	TRUE	average	FALSE	FALSE	TRUE	10	FALSE	79	21.9	11.64285714	-1.011186633	0.984739759	-0.551094823	[-2.231,-0.484)	[ 0.266, 5.061]	[-2.656,-0.455)	0.326	0.438
m	overweight	24.79726027	FALSE	FALSE	0	0	3.59	1.9	1.25	35	0.97	5.1	5.1	25.06	0.862745098	125	72	FALSE	city_over_100	TRUE	average	FALSE	FALSE	TRUE	17	FALSE	88	18.5	9.714285714	-1.669962556	-0.568577092	2.850022759	[-2.231,-0.484)	[-2.114,-0.505)	[ 0.275, 5.091]	0.272	0.37
f	overweight	24.60547945	FALSE	FALSE	1	0	5.04	2.26	1.92	38	1.9	4.9	5	28.04	0.891891892	119	78	FALSE	city_over_100	TRUE	average	FALSE	TRUE	TRUE	19	TRUE	99	34.5	22.5	-0.226311223	0.089630568	0.75998352	[-0.484, 0.387)	[-0.505, 0.266)	[ 0.275, 5.091]	0.63	0.69
f	normal weight	25.94246575	FALSE	FALSE	0	0	4.72	2.66	1.57	33	1.07	5.3	5.1	24.09	0.795918367	104	73	FALSE	city_over_100	TRUE	average	FALSE	TRUE	TRUE	11	FALSE	78	15.1	15.21428571	-0.187253889	-0.413082287	1.087414844	[-0.484, 0.387)	[-0.505, 0.266)	[ 0.275, 5.091]	0.426	0.302
m	overweight	28.45753425	FALSE	FALSE	1	0	4.9	2.63	1.84	38	0.94	5.6	4.9	25.8	0.966666667	121	70	FALSE	city_below_20	FALSE	average	FALSE	FALSE	TRUE	10	FALSE	87	13.1	15.35714286	-0.809566099	-1.343685913	0.027231016	[-2.231,-0.484)	[-2.114,-0.505)	[-0.455, 0.275)	0.43	0.262
m	overweight	27.3369863	FALSE	FALSE	0	0	3.72	2.22	1.15	31	0.76	5	4.8	27.46	0.77	125	81	FALSE	village	FALSE	below_average	FALSE	FALSE	TRUE	19	FALSE	77	31.5	5.571428571	-1.687121203	0.849153062	-0.771570962	[-2.231,-0.484)	[ 0.266, 5.061]	[-2.656,-0.455)	0.156	0.63
f	normal weight	28.13424658	TRUE	FALSE	1	0	4.19	2.03	1.83	44	1.17	4.8	5	21.71	0.75	131	84	TRUE	city_over_100	TRUE	above_average	TRUE	FALSE	TRUE	11	FALSE	75	34.1	21.07142857	-0.090325082	0.172259882	5.090792092	[-0.484, 0.387)	[-0.505, 0.266)	[ 0.275, 5.091]	0.59	0.682
m	normal weight	25.27123288	FALSE	FALSE	2	1	6.98	3.44	1.47	21	4.57	5.5	4.7	24.52	0.989361702	128	80	FALSE	village	FALSE	above_average	TRUE	FALSE	FALSE	6	FALSE	93	14.8	19.28571429	0.960289091	-0.31885834	-0.242850867	[ 0.387, 3.526]	[-0.505, 0.266)	[-0.455, 0.275)	0.54	0.296
m	overweight	28.80273973	FALSE	FALSE	0	0	5.02	3.08	1.26	25	1.5	4.5	5.3	25.06	0.876190476	113	75	FALSE	city_over_100	TRUE	above_average	TRUE	FALSE	TRUE	11	FALSE	92	16.6	19.28571429	0.152668148	-0.088677054	-0.407570759	[-0.484, 0.387)	[-0.505, 0.266)	[-0.455, 0.275)	0.54	0.332
m	normal weight	28.4630137	FALSE	FALSE	0	0	4.66	2.62	1.59	34	1	4.6	4.8	21.72	0.821052632	129	80	FALSE	city_over_100	TRUE	average	FALSE	FALSE	TRUE	19	FALSE	78	13	9.785714286	-0.256606715	-1.006166614	0.010661153	[-0.484, 0.387)	[-2.114,-0.505)	[-0.455, 0.275)	0.274	0.26
f	normal weight	27.39726027	FALSE	TRUE	0	0	4.44	2.09	2.03	46	0.7	4.6	4.6	18.03	0.695652174	111	60	FALSE	city_over_100	TRUE	average	FALSE	FALSE	TRUE	21	FALSE	64	36.3	5.071428571	-1.411053123	0.881826761	1.016316819	[-2.231,-0.484)	[ 0.266, 5.061]	[ 0.275, 5.091]	0.142	0.726
m	overweight	29.67671233	FALSE	FALSE	0	0	4.36	2.59	1.31	30	1.02	5	4.8	26.59500014	1	117	73	FALSE	city_over_100	TRUE	average	FALSE	FALSE	TRUE	12.753	TRUE	102	21.4359	11.12135714	-1.158018909	0.500469298	-0.37294573	[-2.231,-0.484)	[ 0.266, 5.061]	[-0.455, 0.275)	0.31974	0.427422
m	normal weight	29.2739726	FALSE	FALSE	3	1	7.3	4.63	0.9	12	3.9	4.3	5	23.09540901	0.988372093	120	69	FALSE	city_over_100	TRUE	average	FALSE	FALSE	FALSE	12.4595	FALSE	85	19.6735	14.309	-1.229275079	-0.554780483	0.648299101	[-2.231,-0.484)	[-2.114,-0.505)	[ 0.275, 5.091]	0.398782	0.398294
f	normal weight	29.18082192	FALSE	FALSE	0	0	3.76	1.69	1.84	49	0.51	5	4.8	20.34	0.790697674	105	62	FALSE	city_over_100	TRUE	average	FALSE	FALSE	TRUE	18	FALSE	68	28.7	8.785714286	-1.721559378	1.03507312	-0.567411636	[-2.231,-0.484)	[ 0.266, 5.061]	[-2.656,-0.455)	0.246	0.574
m	overweight	30.6739726	FALSE	FALSE	0	0	3.44	1.52	1.56	45	0.8	5.1	4.9	25.7	0.961538462	129	72	FALSE	city_over_100	TRUE	above_average	TRUE	FALSE	TRUE	12	FALSE	100	16.6	17	-0.927023998	-0.124378433	-0.456059431	[-2.231,-0.484)	[-0.505, 0.266)	[-2.656,-0.455)	0.476	0.332
f	normal weight	21.75068493	TRUE	TRUE	0	0	4.1	1.83	1.98	48	0.64	4.7	4.9	18.78	0.776470588	97	56	FALSE	village	FALSE	average	FALSE	FALSE	FALSE	15	FALSE	66	19.5	20	0.545169946	-0.118465706	1.361864603	[ 0.387, 3.526]	[-0.505, 0.266)	[ 0.275, 5.091]	0.56	0.39
f	obese	28.42739726	TRUE	FALSE	1	0	3.79	2.27	1.25	33	0.6	5.1	4.7	33.14	0.804511278	123	78	FALSE	village	FALSE	average	FALSE	FALSE	TRUE	17	TRUE	107	23.1	14.35714286	-0.740080509	-0.156292639	-0.00413039	[-2.231,-0.484)	[-0.505, 0.266)	[-0.455, 0.275)	0.402	0.462
m	overweight	29.1369863	TRUE	TRUE	3	1	5.51	4.03	1.18	21	1.32	5.6	4.9	26.81221871	0.971428571	132	85	FALSE	village	FALSE	average	FALSE	FALSE	FALSE	14	TRUE	102	24.8	22.47107143	0.361152955	-0.908391266	1.075615127	[-0.484, 0.387)	[-2.114,-0.505)	[ 0.275, 5.091]	0.630806	0.496
f	obese	35.62465753	FALSE	FALSE	2	1	4.47	1.57	2.09	47	1.79	4.5	5.2	30.8	0.899159664	154	101	FALSE	city_over_100	TRUE	average	FALSE	FALSE	FALSE	12	TRUE	107	38.1	8.714285714	-1.688636395	-0.269583611	-0.562865416	[-2.231,-0.484)	[-0.505, 0.266)	[-2.656,-0.455)	0.244	0.762
f	overweight	30.5369863	FALSE	FALSE	0	0	5.7	3.61	1.54	27	1.2	5.2	4.7	27.68	0.761904762	110	72	FALSE	city_over_100	TRUE	average	FALSE	TRUE	TRUE	15	FALSE	80	13	24.28571429	-0.42698879	-1.198694675	-0.676448158	[-0.484, 0.387)	[-2.114,-0.505)	[-2.656,-0.455)	0.68	0.26
m	normal weight	26.28219178	FALSE	FALSE	1	0	5.92	3.61	1.76	30	1.2	5.2	4.5	23.53	0.882978723	128	75	FALSE	city_over_100	TRUE	average	FALSE	FALSE	TRUE	14	FALSE	83	33.1	14.35714286	0.172796461	-0.968909767	2.39579619	[-0.484, 0.387)	[-2.114,-0.505)	[ 0.275, 5.091]	0.402	0.662
m	obese	27.62739726	TRUE	TRUE	2	1	4.44	2.97	0.75	17	1.58	5.1	4.8	33.02	0.981818182	137	82	FALSE	city_over_100	TRUE	average	FALSE	FALSE	FALSE	12	TRUE	108	17.2	21.28571429	-0.21813349	-1.108794412	0.774029962	[-0.484, 0.387)	[-2.114,-0.505)	[ 0.275, 5.091]	0.596	0.344
m	obese	32.36	FALSE	TRUE	1	0	5.65	3.59	1.35	24	1.57	5.2	5	33.2	1	110	72	FALSE	city_over_100	TRUE	average	FALSE	TRUE	FALSE	7	TRUE	110	12.6	15.64285714	0.783504467	-0.263873281	0.225186914	[ 0.387, 3.526]	[-0.505, 0.266)	[-0.455, 0.275)	0.438	0.252
m	normal weight	32.28219178	TRUE	FALSE	0	0	2.98	1.63	1.05	35	0.65	5	5.1	24.42	0.891304348	118	75	FALSE	city_below_20	FALSE	above_average	TRUE	FALSE	FALSE	12	FALSE	82	51	18.21428571	-1.18210493	1.422110921	-0.733559108	[-2.231,-0.484)	[ 0.266, 5.061]	[-2.656,-0.455)	0.51	1.02
f	overweight	31.66027397	FALSE	FALSE	0	0	5.75	3.88	1.42	25	0.99	4.7	4.9	28.26	0.9375	109	78	FALSE	city_over_100	TRUE	average	FALSE	FALSE	TRUE	15	TRUE	90	45.6	27.64285714	0.167221561	1.266646583	2.437732217	[-0.484, 0.387)	[ 0.266, 5.061]	[ 0.275, 5.091]	0.774	0.912
m	overweight	32.92328767	FALSE	FALSE	0	0	4.15	2.67	1.1	27	0.83	5	4.8	29	0.910891089	125	80	FALSE	city_over_100	TRUE	average	FALSE	FALSE	TRUE	13	FALSE	92	31.5	22.28571429	-0.418922499	0.815967102	0.37496866	[-0.484, 0.387)	[ 0.266, 5.061]	[ 0.275, 5.091]	0.624	0.63
f	normal weight	30.56712329	FALSE	FALSE	1	0	4.91	3.11	1.45	30	0.77	4.2	5.1	20.66	0.855555556	118	88	FALSE	city_over_100	TRUE	average	FALSE	FALSE	FALSE	14	FALSE	77	36.4	19.71428571	-0.334209801	1.752436557	0.180642155	[-0.484, 0.387)	[ 0.266, 5.061]	[-0.455, 0.275)	0.552	0.728
m	normal weight	25.69589041	FALSE	FALSE	0	0	3.44	1.49	1.52	44	0.95	4.4	4.9	21.33	0.802079437	119	75	FALSE	city_over_100	TRUE	average	FALSE	FALSE	TRUE	20	FALSE	75.59626	21.9	9.5	-0.504820457	1.125396539	-1.475138387	[-2.231,-0.484)	[ 0.266, 5.061]	[-2.656,-0.455)	0.266	0.438
m	overweight	31.43835616	TRUE	FALSE	0	0	5.17	3.29	1.65	32	0.85	5.3	5.4	26.8744961	0.969387755	100	60	TRUE	city_over_100	TRUE	below_average	FALSE	TRUE	FALSE	12	FALSE	95	14.1	14.35714286	-1.370998553	-1.640876103	-0.906408305	[-2.231,-0.484)	[-2.114,-0.505)	[-2.656,-0.455)	0.402	0.282
f	normal weight	33.22739726	FALSE	FALSE	0	0	4.05	1.66	2.03	50	0.79	4.8	5	20.44913742	0.776595745	105	65	FALSE	city_over_100	TRUE	above_average	TRUE	FALSE	TRUE	15.375	FALSE	73	34.94435	9.302321429	-1.222778027	2.161522067	0.477467207	[-2.231,-0.484)	[ 0.266, 5.061]	[ 0.275, 5.091]	0.259502	0.704314
m	normal weight	35.6630137	TRUE	FALSE	1	0	7.92	6.03	1.21	15	1.49	5.5	4.8	24.07407407	1.096774194	117	73	TRUE	city_over_100	TRUE	above_average	TRUE	FALSE	TRUE	11.502	TRUE	102	18.7362	16.97342857	-0.453059462	-0.107877067	-0.815663175	[-0.484, 0.387)	[-0.505, 0.266)	[-2.656,-0.455)	0.481692	0.378888
f	normal weight	25.50136986	FALSE	FALSE	0	0	4.1	2.13	1.52	37	1	5.3	4.6	22.18391905	0.768421053	113	68	FALSE	city_over_100	TRUE	average	FALSE	TRUE	TRUE	14.18	FALSE	73	23.6683	10.03621429	-0.877183312	0.807688421	-0.608711613	[-2.231,-0.484)	[ 0.266, 5.061]	[-2.656,-0.455)	0.28384	0.47127
m	normal weight	28.20273973	FALSE	FALSE	0	0	3.29	1.04	1.52	46	1.61	5.4	4.7	23.99945917	1	120	72	FALSE	city_over_100	TRUE	average	FALSE	TRUE	TRUE	11.564	FALSE	90	20.3074	16.67671429	0.312300289	0.620443707	-0.766889623	[-0.484, 0.387)	[ 0.266, 5.061]	[-2.656,-0.455)	0.472036	0.40833
f	normal weight	22.72328767	FALSE	FALSE	1	0	3.67	1.23	1.62	44	1.8	4.6	4.6	24.3496358	0.754901961	107	65	FALSE	city_over_100	TRUE	average	FALSE	TRUE	TRUE	13.431	FALSE	77	23.4997	9.922571429	-1.437086868	-0.108255498	0.808142576	[-2.231,-0.484)	[-0.505, 0.266)	[ 0.275, 5.091]	0.278522	0.468108
m	overweight	23.70410959	FALSE	FALSE	1	0	3.73	1.98	1.19	32	1.23	5.6	4.9	25.82644628	1.149425287	107	71	FALSE	city_over_100	TRUE	average	FALSE	TRUE	TRUE	11.107	FALSE	100	16.2612	16.59857143	0.30162799	-0.446861239	-0.638567024	[-0.484, 0.387)	[-0.505, 0.266)	[-2.656,-0.455)	0.468636	0.321852
f	normal weight	29.7	FALSE	FALSE	1	0	6.18	3.52	1.5	24	2.55	4.5	4.7	20.2020202	0.833333333	116	70	FALSE	city_over_100	TRUE	average	FALSE	FALSE	TRUE	16	FALSE	65	19.1	7.857142857	-0.511655097	-0.918408261	-0.813085301	[-2.231,-0.484)	[-2.114,-0.505)	[-2.656,-0.455)	0.22	0.382
m	overweight	26	TRUE	FALSE	0	0	4.93	2.8	1.76	36	0.82	4.9	5.2	25.10239133	0.895833333	123.082	71.252	TRUE	village	FALSE	average	FALSE	FALSE	FALSE	9	FALSE	86	24.6	25.92857143	1.605921592	0.46297116	0.662998673	[ 0.387, 3.526]	[ 0.266, 5.061]	[ 0.275, 5.091]	0.726	0.492
m	obese	33.22191781	TRUE	FALSE	3	1	7.21	5.41	1.23	17	2.58	5.3	5.2	40.91	0.975609756	132	92	TRUE	city_20_100	TRUE	average	FALSE	FALSE	FALSE	10	TRUE	120	36.3	46.92857143	3.055479601	1.254229111	-0.799701492	[ 0.387, 3.526]	[ 0.266, 5.061]	[-2.656,-0.455)	1.314	0.726
m	normal weight	35.49589041	TRUE	TRUE	3	1	6.08	3.65	1.68	28	1.78	5.6	5.4	23.51020408	1.022222222	120	80	TRUE	city_over_100	TRUE	average	FALSE	TRUE	FALSE	10	FALSE	92	6	30.21428571	0.625452229	-0.432372304	0.024899741	[ 0.387, 3.526]	[-0.505, 0.266)	[-0.455, 0.275)	0.846	0.12
f	normal weight	28.4630137	TRUE	FALSE	1	0	4.34	2.57	1.56	36	0.83	5.6	5.6	21.77	0.858695652	110	70	FALSE	city_below_20	FALSE	average	FALSE	FALSE	FALSE	9	FALSE	79	34.5	11.57142857	-0.498364344	-0.197068366	-0.24190877	[-2.231,-0.484)	[-0.505, 0.266)	[-0.455, 0.275)	0.324	0.69
m	overweight	31.01369863	TRUE	FALSE	1	0	4.19	2.58	1.58	38	0.49	5	5.3	26.2911287	0.911504425	123	85	FALSE	city_below_20	FALSE	above_average	TRUE	FALSE	TRUE	14	TRUE	103	10.5	32	1.587153778	-0.168535454	-0.924636067	[ 0.387, 3.526]	[-0.505, 0.266)	[-2.656,-0.455)	0.896	0.21
m	normal weight	31	TRUE	TRUE	2	1	5.05	3.38	1.07	21	2.32	5.2	5.1	24.96800974	0.861111111	144	83	FALSE	city_20_100	TRUE	average	FALSE	FALSE	FALSE	8	FALSE	93	16.9	31.92857143	1.548682888	-0.760663746	0.747456473	[ 0.387, 3.526]	[-2.114,-0.505)	[ 0.275, 5.091]	0.894	0.338
m	overweight	30.35890411	TRUE	FALSE	4	1	5.34	3.67	1.21	23	2.21	5.7	5.7	28.08901095	0.981818182	136	98	TRUE	city_over_100	TRUE	average	FALSE	TRUE	TRUE	6	TRUE	108	12.4	11.14285714	-0.836283263	-1.230069915	-0.191948108	[-2.231,-0.484)	[-2.114,-0.505)	[-0.455, 0.275)	0.312	0.248
m	overweight	33.46575342	TRUE	FALSE	1	0	4.81	3.04	1.5	31	0.99	5.8	5.3	27.1430375	0.896907216	120	80	FALSE	city_20_100	TRUE	average	FALSE	FALSE	TRUE	8	FALSE	87	19.9	22.78571429	0.849624855	0.039971166	0.191522617	[ 0.387, 3.526]	[-0.505, 0.266)	[-0.455, 0.275)	0.638	0.398
m	normal weight	28.92876712	TRUE	FALSE	1	0	5.16	3.7	1.33	26	1.07	5.7	5.3	24.16326531	0.914893617	100	60	FALSE	city_20_100	TRUE	average	FALSE	TRUE	TRUE	12	FALSE	86	15.9	19.28571429	0.351752972	0.240332246	-0.17074156	[-0.484, 0.387)	[-0.505, 0.266)	[-0.455, 0.275)	0.54	0.318
m	overweight	28.14794521	TRUE	FALSE	4	1	8.35	3.21	0.64	8	11.87	5.5	5.7	27.6816609	0.915789474	140	90	TRUE	city_over_100	TRUE	below_average	FALSE	FALSE	FALSE	6	FALSE	87	16.2	27.85714286	1.584244465	-0.559829367	1.492454381	[ 0.387, 3.526]	[-2.114,-0.505)	[ 0.275, 5.091]	0.78	0.324
f	normal weight	22.43561644	TRUE	TRUE	2	1	4.83	2.05	2.6	54	1.04	5.6	4.6	22.03856749	0.806451613	133	70	FALSE	city_20_100	TRUE	average	FALSE	FALSE	FALSE	11	FALSE	75	23.9	16.78571429	0.514841701	-0.173266692	0.588607206	[ 0.387, 3.526]	[-0.505, 0.266)	[ 0.275, 5.091]	0.47	0.478
m	overweight	28.04109589	TRUE	TRUE	1	0	3.87	2.13	1.39	36	0.83	5.5	4.8	29.11452647	0.896551724	137	68	TRUE	city_over_100	TRUE	average	FALSE	FALSE	TRUE	14	TRUE	104	22.3	19.78571429	-0.847381926	-0.05595652	0.10265672	[-2.231,-0.484)	[-0.505, 0.266)	[-0.455, 0.275)	0.554	0.446
m	normal weight	31.54794521	TRUE	FALSE	2	1	3.95	2.56	1.16	29	1.1	5.6	4.9	23.50355606	0.830188679	142	83	TRUE	city_over_100	TRUE	average	FALSE	FALSE	FALSE	12	FALSE	88	16.6	17.78571429	-0.005084328	-0.421189902	-0.785188221	[-0.484, 0.387)	[-0.505, 0.266)	[-2.656,-0.455)	0.498	0.332
m	overweight	34.59726027	TRUE	FALSE	0	0	3.99	2.46	1.52	38	0.49	5.3	5.3	25.39343112	0.946236559	120	80	FALSE	city_below_20	FALSE	above_average	TRUE	TRUE	TRUE	10	FALSE	88	7.8	15.42857143	0.583385442	-1.259531183	-1.430649331	[ 0.387, 3.526]	[-2.114,-0.505)	[-2.656,-0.455)	0.432	0.156
m	normal weight	22.13424658	TRUE	FALSE	2	1	5.23	2.93	2.13	41	0.78	4.7	5.1	22.47120876	0.852272727	120	90	TRUE	city_below_20	FALSE	above_average	TRUE	FALSE	FALSE	15	FALSE	75	48.2	39.78571429	2.07292617	2.949477913	0.644359847	[ 0.387, 3.526]	[ 0.266, 5.061]	[ 0.275, 5.091]	1.114	0.964
m	overweight	30.78630137	TRUE	FALSE	0	0	4.85	2.67	2.13	44	0.54	5.1	5	25.14741589	0.9	120	80	FALSE	city_over_100	TRUE	above_average	TRUE	FALSE	TRUE	12	FALSE	90	10.4	14.85714286	-0.277794384	-0.971220186	1.071287962	[-0.484, 0.387)	[-2.114,-0.505)	[ 0.275, 5.091]	0.416	0.208
f	normal weight	24.86575342	TRUE	FALSE	1	0	6.1	3.63	2.02	33	2.31	4.5	5.1	23.4375	0.776470588	110	70	FALSE	city_below_20	FALSE	average	FALSE	FALSE	FALSE	11	FALSE	66	28	9	-1.360552748	0.437934173	-0.062315961	[-2.231,-0.484)	[ 0.266, 5.061]	[-0.455, 0.275)	0.252	0.56
f	overweight	24.53424658	TRUE	FALSE	1	0	5.1	3.03	1.83	36	1.7	5.3	5.4	26.9357195	0.869565217	120	80	FALSE	city_below_20	FALSE	above_average	TRUE	FALSE	TRUE	10	FALSE	80	45.7	7.428571429	-1.557821505	1.097875137	0.3622781	[-2.231,-0.484)	[ 0.266, 5.061]	[ 0.275, 5.091]	0.208	0.914
f	overweight	28.2	TRUE	FALSE	0	0	5.05	3.28	1.51	30	0.75	5.3	5.1	26.89232314	0.83	100	60	FALSE	city_below_20	FALSE	average	FALSE	FALSE	TRUE	13	FALSE	83	40.7	2.714285714	-1.854298332	0.921897041	-0.046854711	[-2.231,-0.484)	[ 0.266, 5.061]	[-0.455, 0.275)	0.076	0.814
f	obese	32.91506849	TRUE	FALSE	2	1	6.1	4.48	0.97	16	2.09	5	5.1	33.80205516	0.814516129	110	70	FALSE	city_over_100	TRUE	above_average	TRUE	TRUE	TRUE	14	TRUE	101	17.7	12.71428571	-1.156685705	-0.98221418	0.594186668	[-2.231,-0.484)	[-2.114,-0.505)	[ 0.275, 5.091]	0.356	0.354
m	normal weight	30.14794521	TRUE	FALSE	0	0	3.11	1.08	2.2	71	0.27	5.4	5.3	22.69401893	0.896907216	109	52	FALSE	city_over_100	TRUE	average	FALSE	FALSE	TRUE	9	FALSE	87	33.4	8.928571429	-1.086861881	1.20575553	-0.404576888	[-2.231,-0.484)	[ 0.266, 5.061]	[-0.455, 0.275)	0.25	0.668
f	overweight	25.11780822	TRUE	FALSE	0	0	4.06	2.37	1.55	38	0.63	5	5.3	27.82	0.886792453	108	73	FALSE	city_20_100	TRUE	average	FALSE	FALSE	TRUE	15	TRUE	94	12.6	7.857142857	-0.081028249	-0.563790863	-0.188168517	[-0.484, 0.387)	[-2.114,-0.505)	[-0.455, 0.275)	0.22	0.252
m	normal weight	21.83835616	TRUE	FALSE	0	0	3.38	2.11	1.06	31	0.43	5.4	5	24.97959184	0.846153846	127	60	FALSE	city_20_100	TRUE	below_average	FALSE	TRUE	FALSE	10	FALSE	88	24.2	22.64285714	-0.3520366	-1.118641316	0.909479632	[-0.484, 0.387)	[-2.114,-0.505)	[ 0.275, 5.091]	0.634	0.484
